# Supplementary material
Source: PubMed Central journal article supplement (PMC2575246)

C:\Users\ffuwa\HF15152.1  
 HF15152  
 01-10-2004 12:09:49  
 1H  
 single.pulse.ex2  
 399.78 MHz  
 4.19 KHz  
 7.29 Hz  
 8192  
 7503.00 Hz  
 16  
 1.0918 sec  
 30.0000 sec  
 5.85 usec  
 1H  
 22.6 c  
 CDCL3  
 7.24 ppm  
 0.12 Hz  
 42

DFILE  
 COMNT  
 DATIM  
 OBNUC  
 EXMOD  
 OBFRQ  
 OBSET  
 OBFIN  
 POINT  
 FREQU  
 SCANS  
 ACQTM  
 PD  
 PW1  
 IRNUC  
 CTEMP  
 SLVNT  
 EXREF  
 BF  
 RGAIN

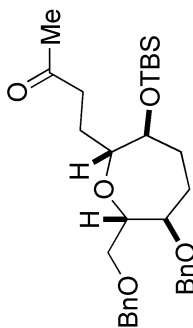

58

(400 MHz, CDCl<sub>3</sub>)

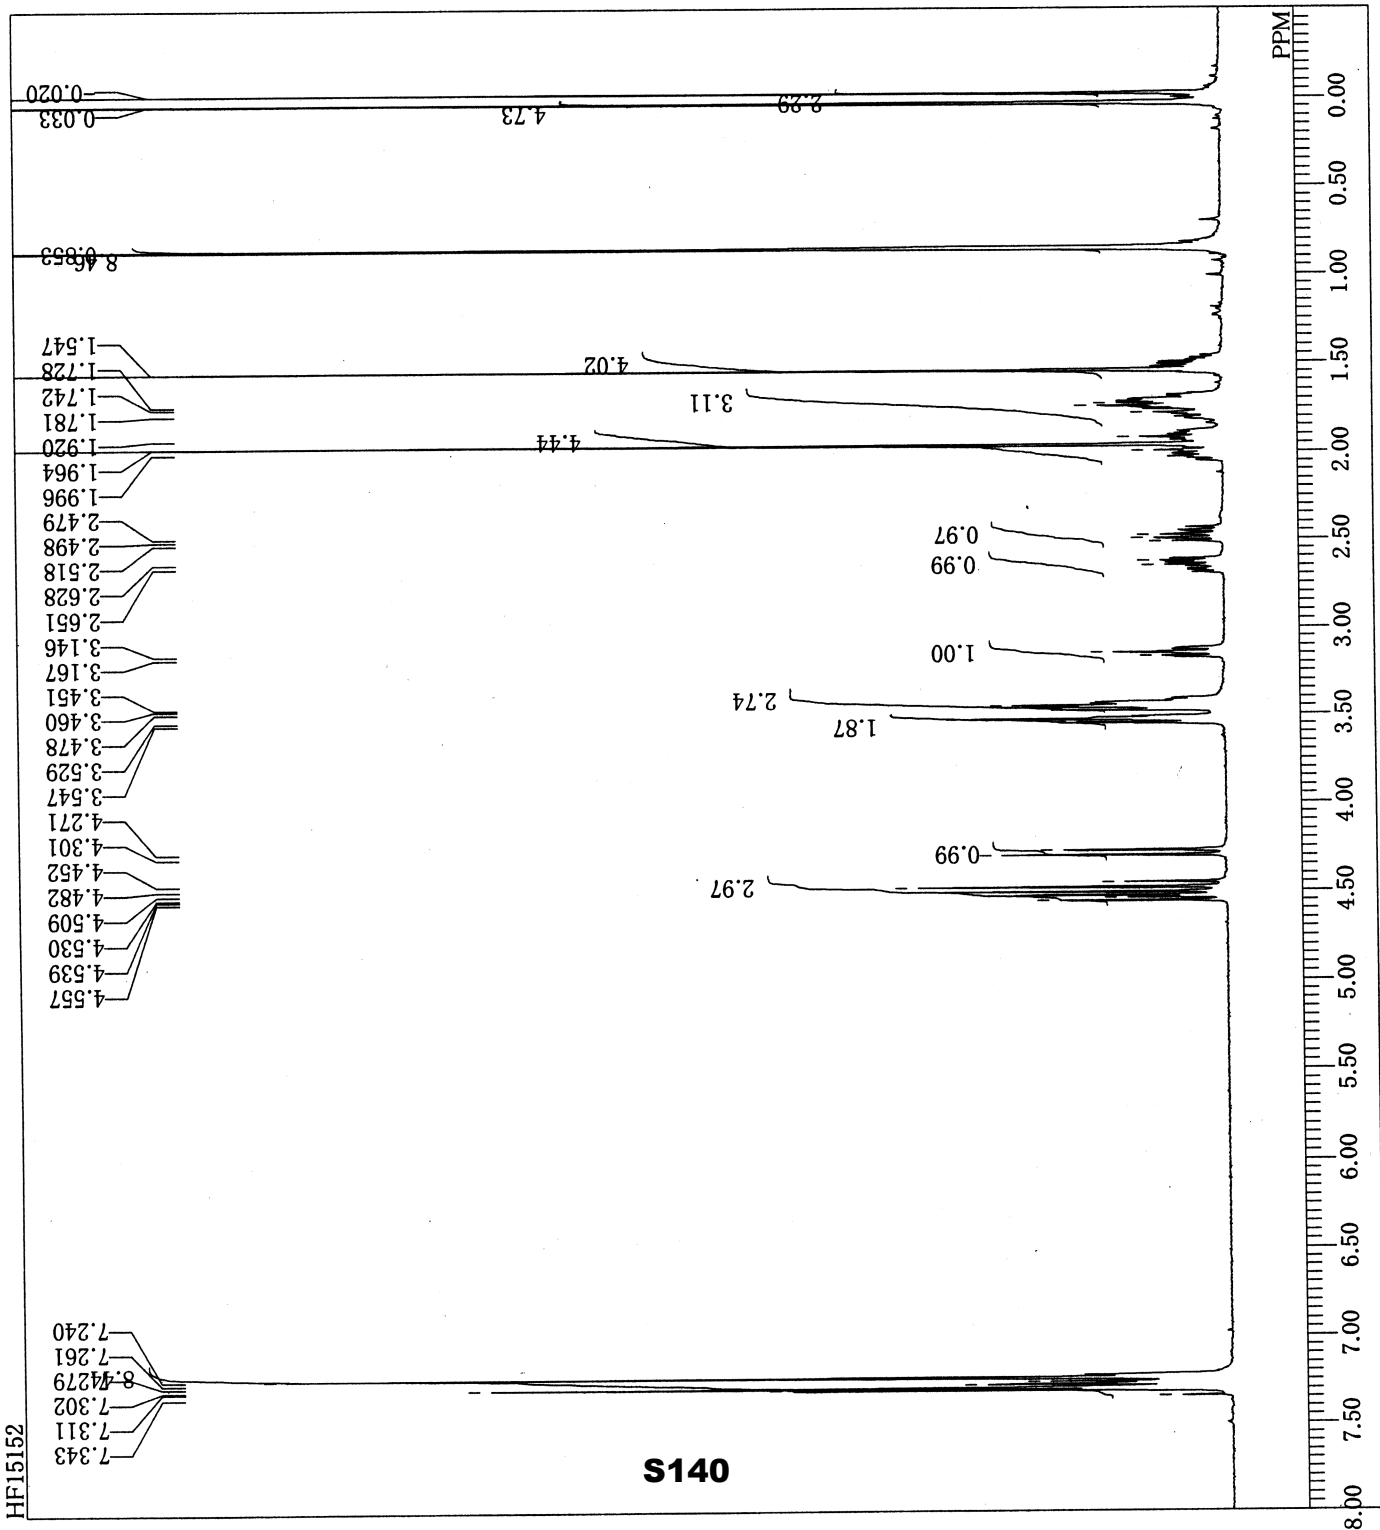

HF15156

DFILE  
COMINT  
DATIM  
OBNUC  
EXMOD  
OBFRQ  
OBSET  
OBFIN  
POINT  
FREQU  
SCANS  
ACQTM  
PD  
PW1  
IRNUC  
CTEMP  
SLVNT  
EXREF  
BF  
RGAIN

C:\Users\fuwa\HF15156.1  
HF15156  
02-10-2004 15:01:28  
1H  
single\_pulse.ex2  
399.78 MHz  
4.19 KHz  
7.29 Hz  
8192  
7503.00 Hz  
16  
1.0918 sec  
30.0000 sec  
5.85 usec  
1H  
22.7 c  
C6D6  
7.15 ppm  
0.12 Hz  
40

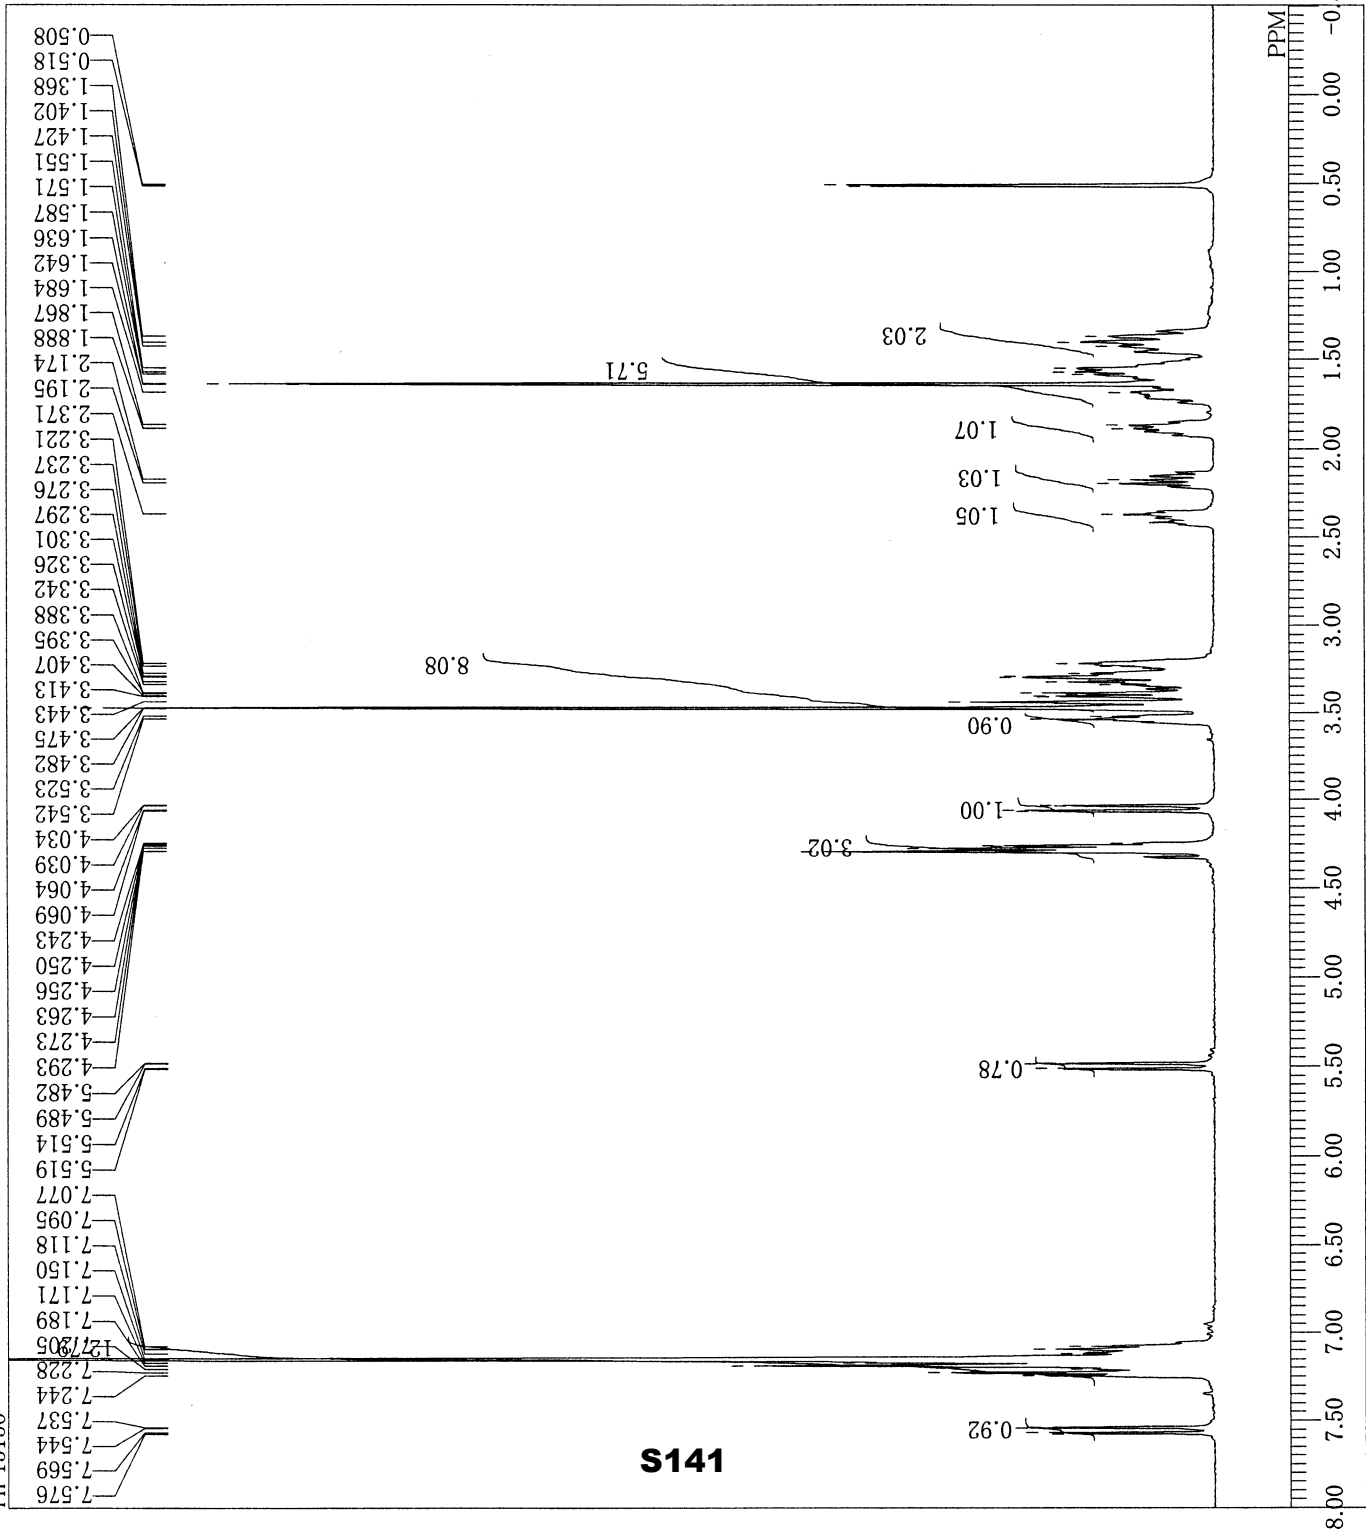

S141

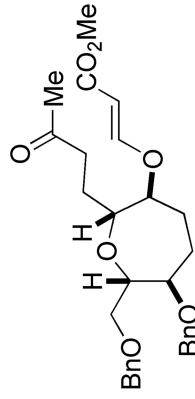

59

(400 MHz, C<sub>6</sub>D<sub>6</sub>)

HF15157a

DFILE  
 COMNT  
 DATIM  
 OBNUC  
 EXMOD  
 OBFREQ  
 OBSET  
 OBFIN  
 POINT  
 FREQU  
 SCANS  
 ACQTM  
 PD  
 PW1  
 IRNUC  
 CTEMP  
 SLVNT  
 EXREF  
 BF  
 RGAIN

C:\Users\Yfuwa\HF15157a.1  
 HF15157a  
 02-10-2004 18:16:50  
 1H  
 single.pulse.ex2  
 399.78 MHz  
 4.19 KHz  
 7.29 Hz  
 8192  
 7503.00 Hz  
 16  
 1.0918 sec  
 30.0000 sec  
 5.85 usec  
 1H  
 22.6 c  
 C6D6  
 7.15 ppm  
 0.12 Hz  
 36

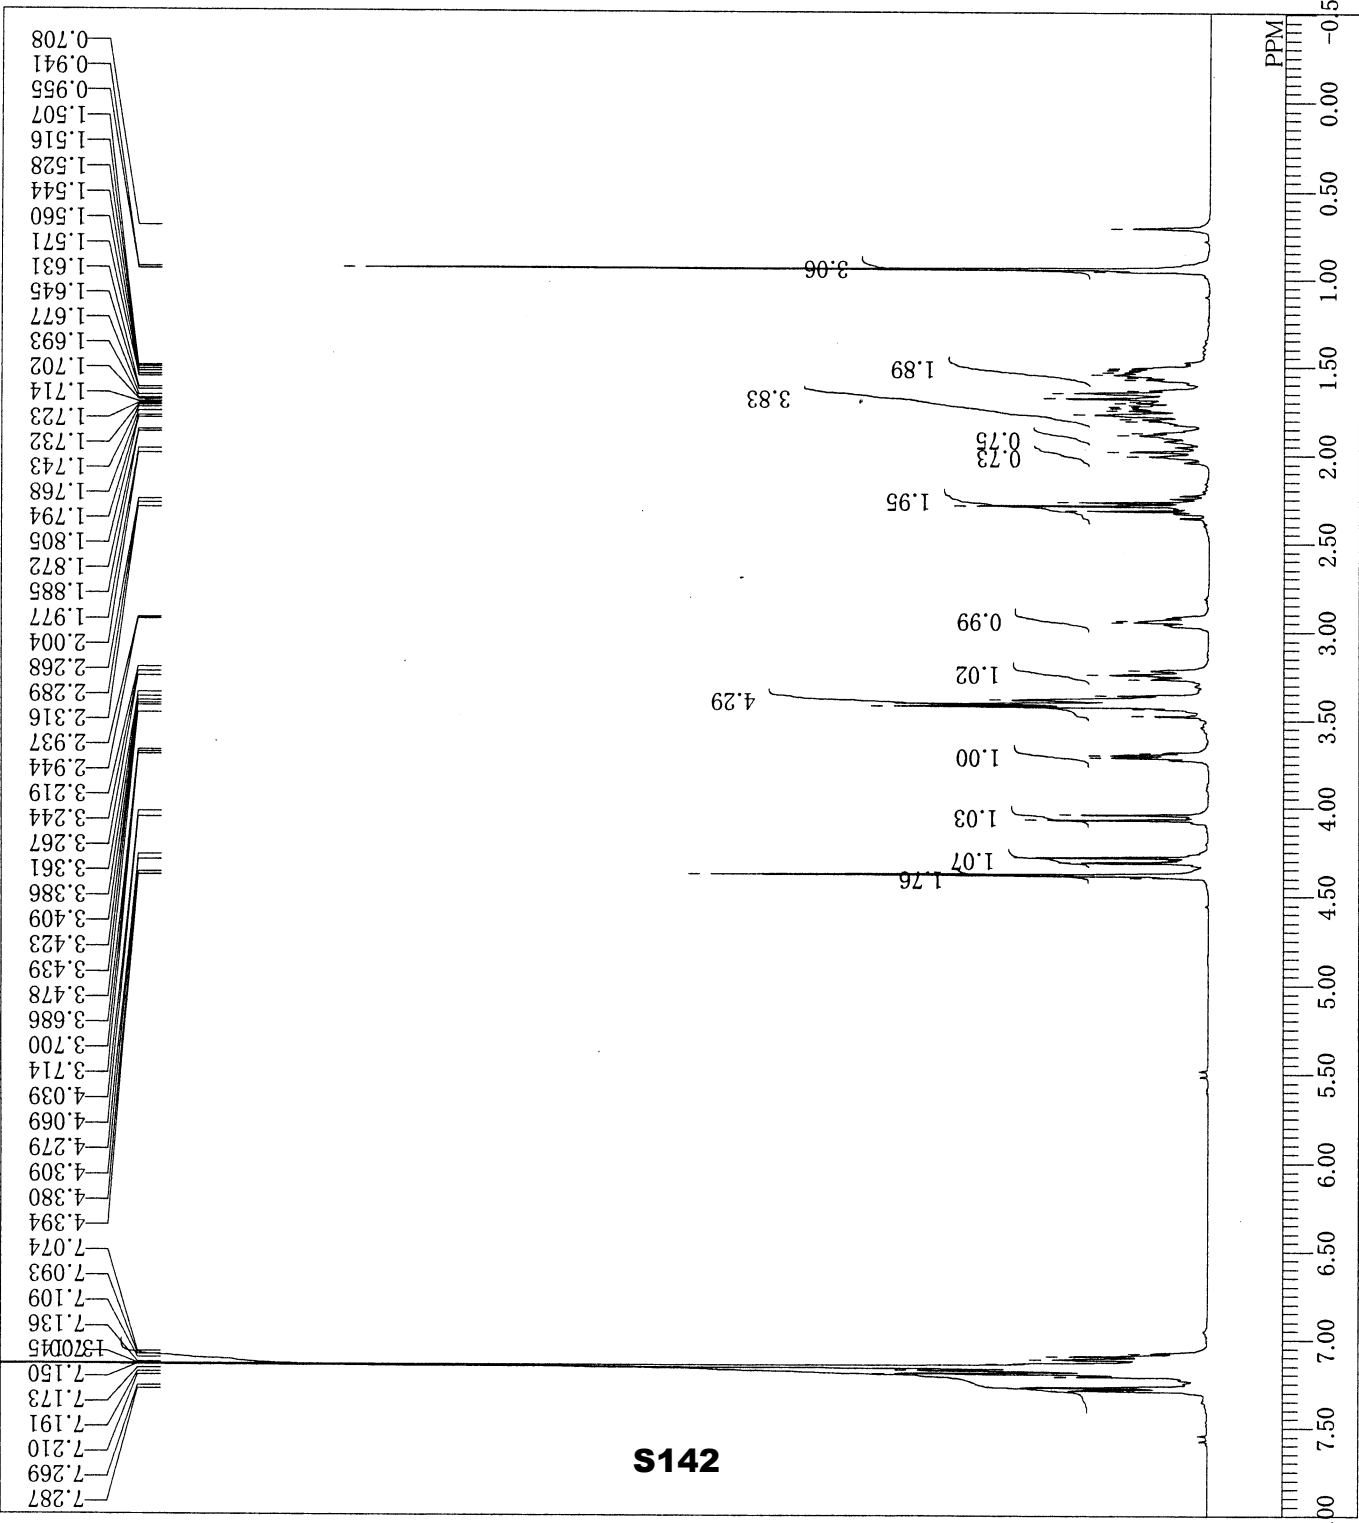

S142

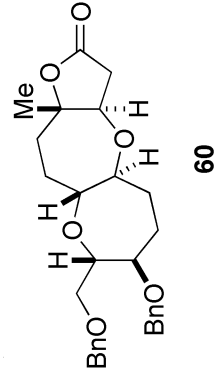

(400 MHz, C<sub>6</sub>D<sub>6</sub>)

DFILE  
 COMNT  
 DATIM  
 OBNUC  
 EXMOD  
 OBFRQ  
 OBSET  
 OBFIN  
 POINT  
 FREQU  
 SCANS  
 ACQTM  
 PD  
 PWI  
 IRNUC  
 CTEMP  
 SLVNT  
 EXREF  
 BF  
 RGAIN

C:\Users\fuwa\HF15157a\_bcm.1  
 HF15157a  
 02-10-2004 19:29:57  
 13C  
 single\_pulse\_dec  
 100.53 MHz  
 5.35 KHz  
 5.86 Hz  
 32768  
 32938.08 Hz  
 256  
 0.9948 sec  
 1.5000 sec  
 3.13 usec  
 1H  
 23.3 c  
 C6D6  
 128.00 ppm  
 0.12 Hz  
 60

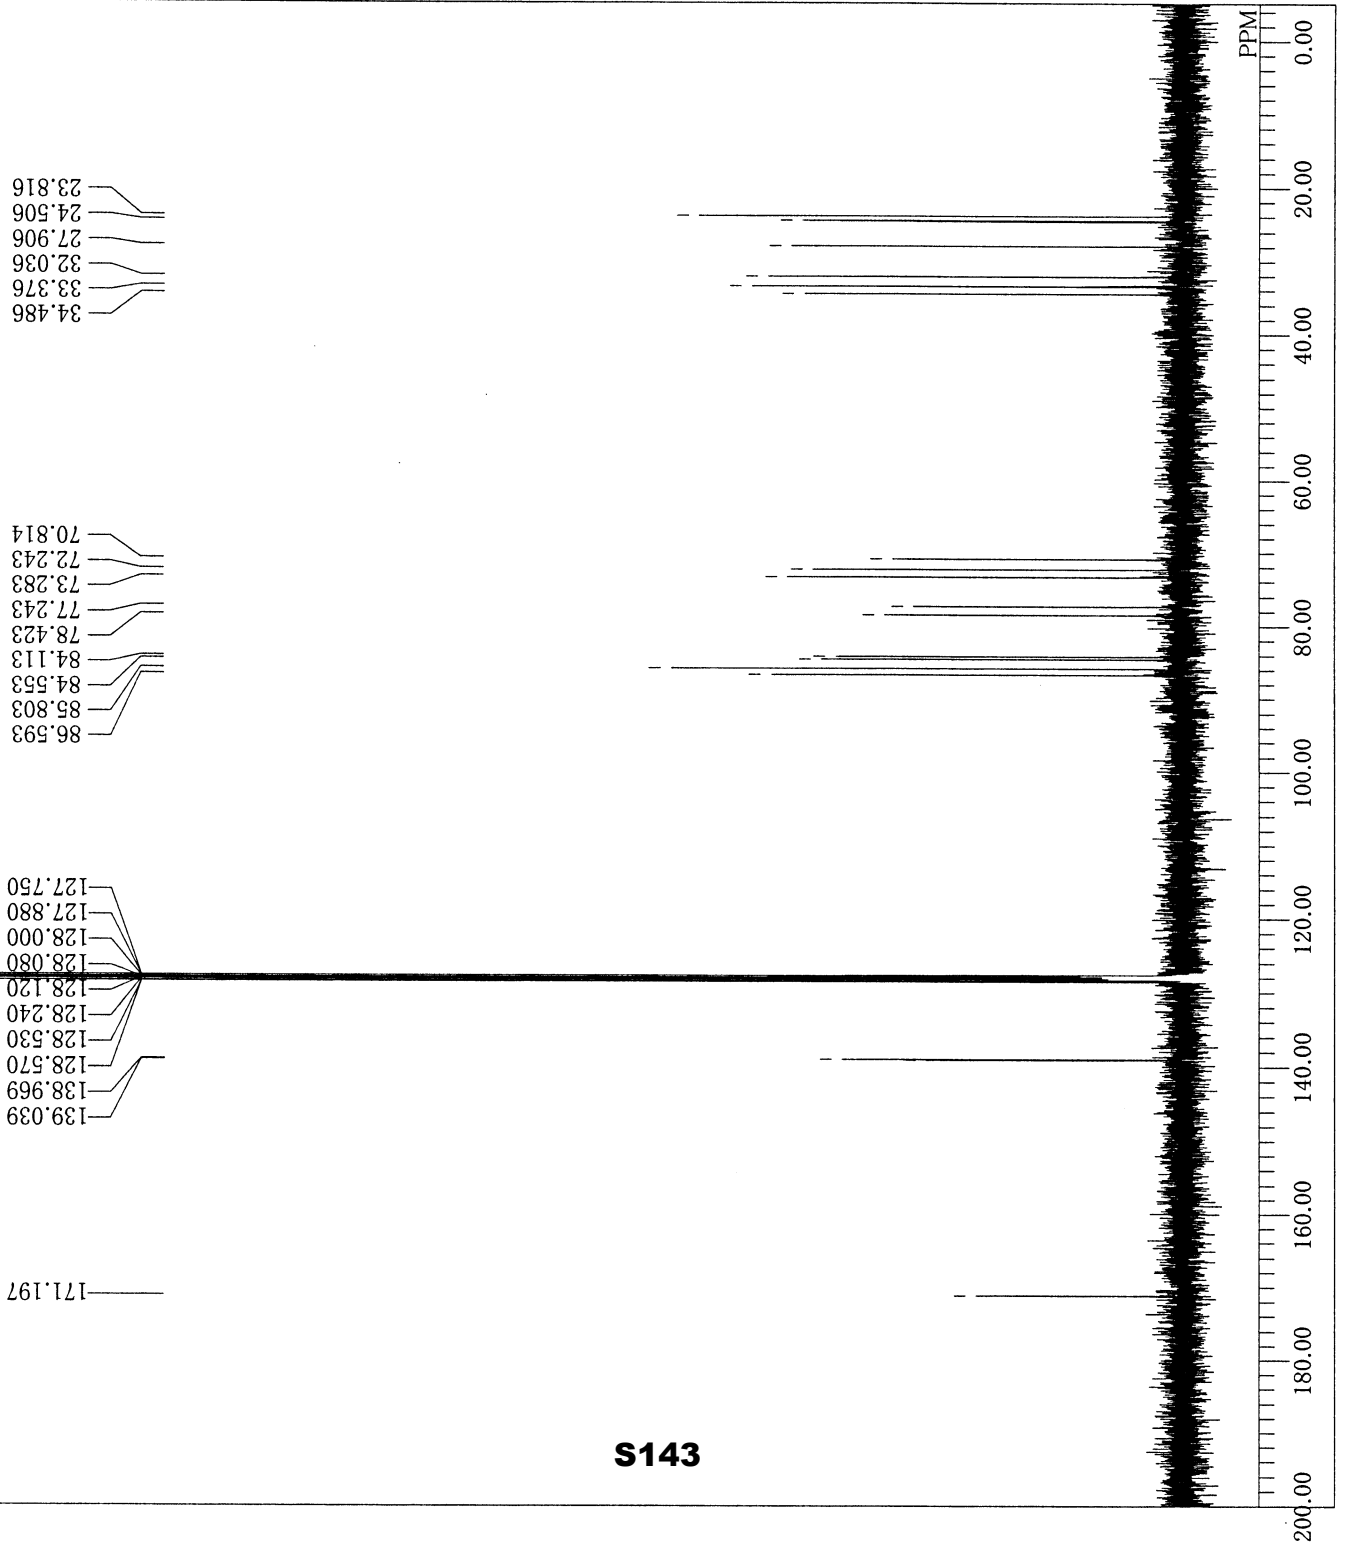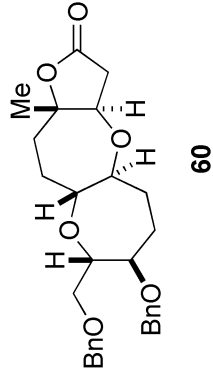

(100 MHz, C<sub>6</sub>D<sub>6</sub>)

HF15157b

S144

DFILE  
 COMNT  
 DATIM  
 OBNUC  
 EXMOD  
 OBFRQ  
 OBSST  
 OBFIN  
 POINT  
 FREQU  
 SCANS  
 ACQTM  
 PD  
 PW1  
 IRNUC  
 CTEMP  
 SLVNT  
 EXREF  
 BF  
 RGAIN

C:\Users\fuwa\HF15157b.1  
 HF15157b  
 02-10-2004 18:22:22  
 1H  
 single\_pulse.ex2  
 399.78 MHz  
 4.19 KHz  
 7.29 Hz  
 8192  
 7503.00 Hz  
 16  
 1.0918 sec  
 30.0000 sec  
 5.85 usec  
 1H  
 22.6 c  
 C6D6  
 7.15 ppm  
 0.12 Hz  
 36

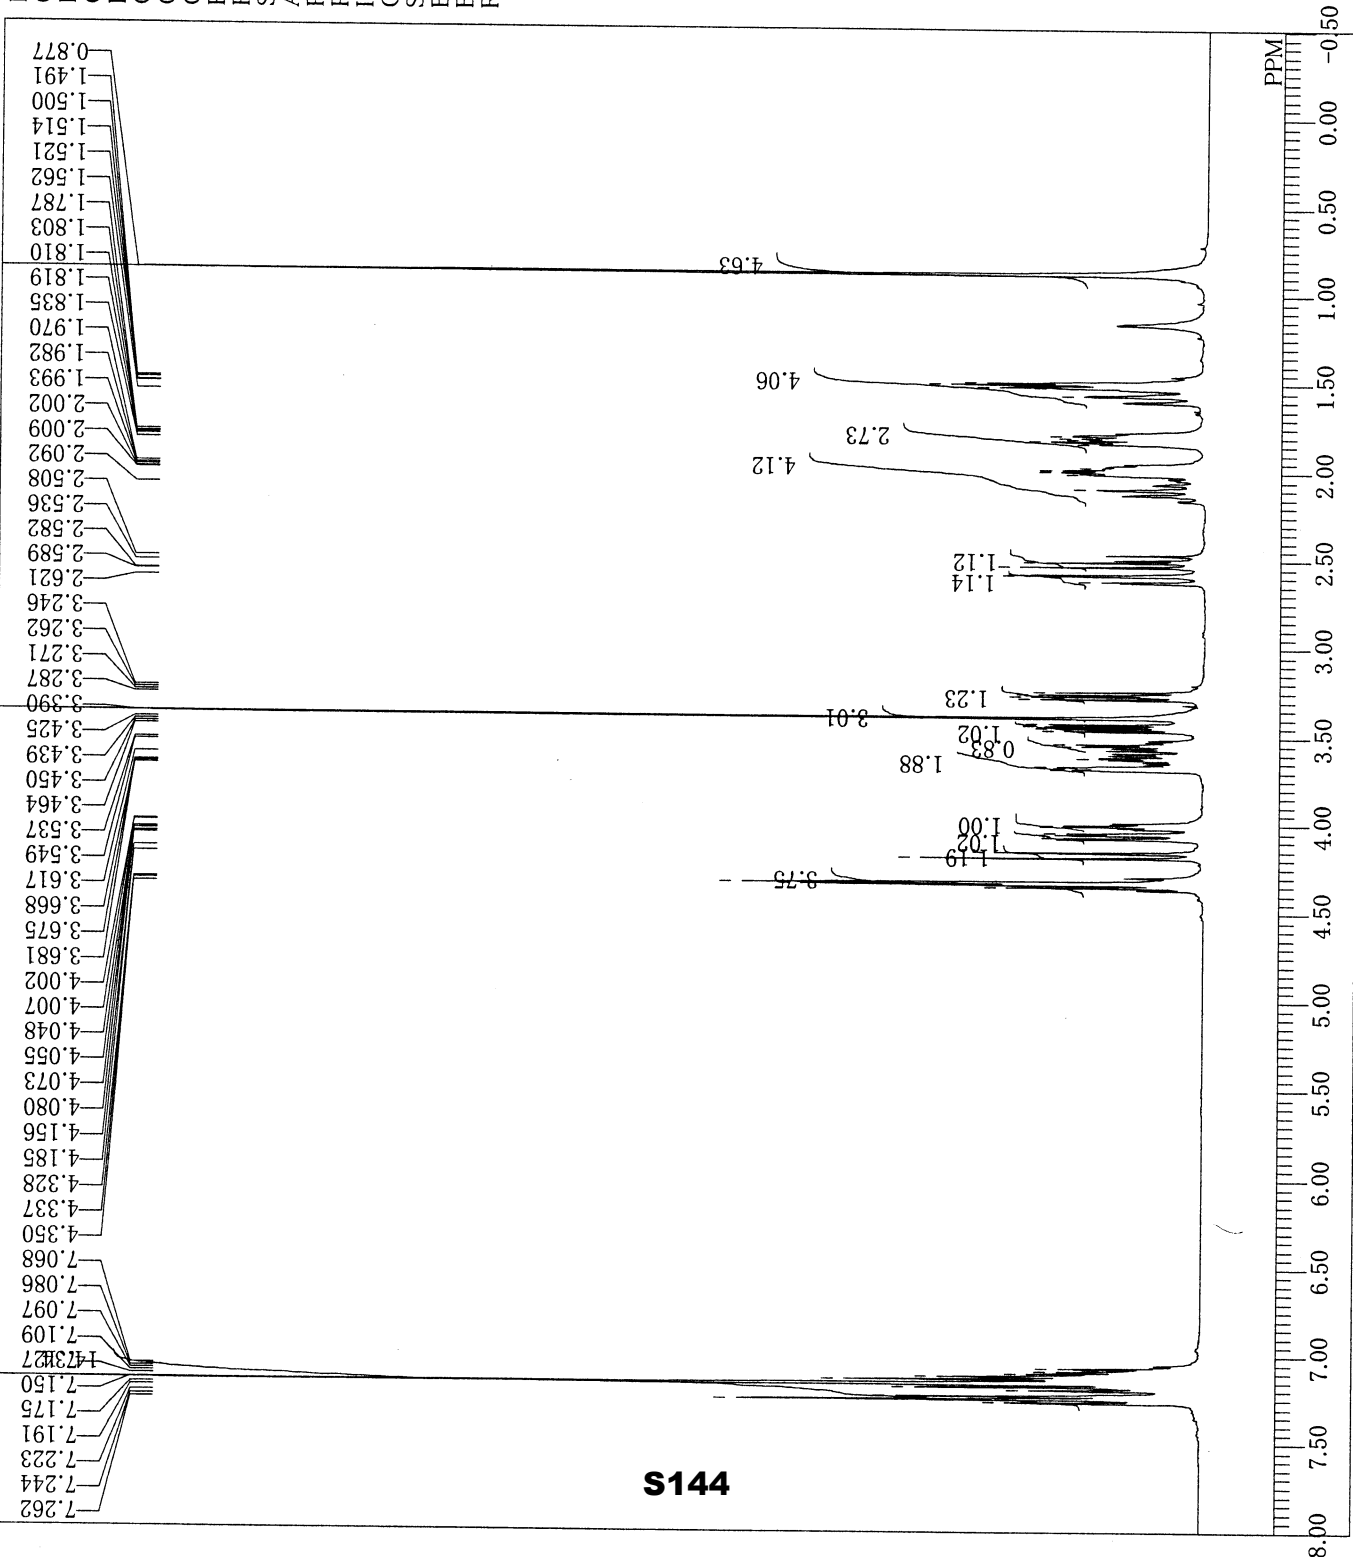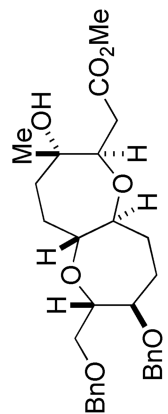

61

(400 MHz, C<sub>6</sub>D<sub>6</sub>)

DFILE  
COMNT  
DATIM  
OBNUC  
EXMOD  
OBFRQ  
OBSET  
OBFIN  
POINT  
FREQU  
SCANS  
ACQTM  
PD  
PW1  
IRNUC  
CTEMP  
SLVNT  
EXREF  
BF  
RGAIN

C:\Users\Yfuwa\HF15157b\_bcm.1  
HF15157b  
02-10-2004 19:48:30  
13C  
single\_pulse\_dec  
100.53 MHz  
5.35 KHz  
5.86 Hz  
32768  
32938.08 Hz  
256  
0.9948 sec  
1.5000 sec  
3.13 usec  
1H 23.3 c  
C6D6  
128.00 ppm  
0.12 Hz  
60

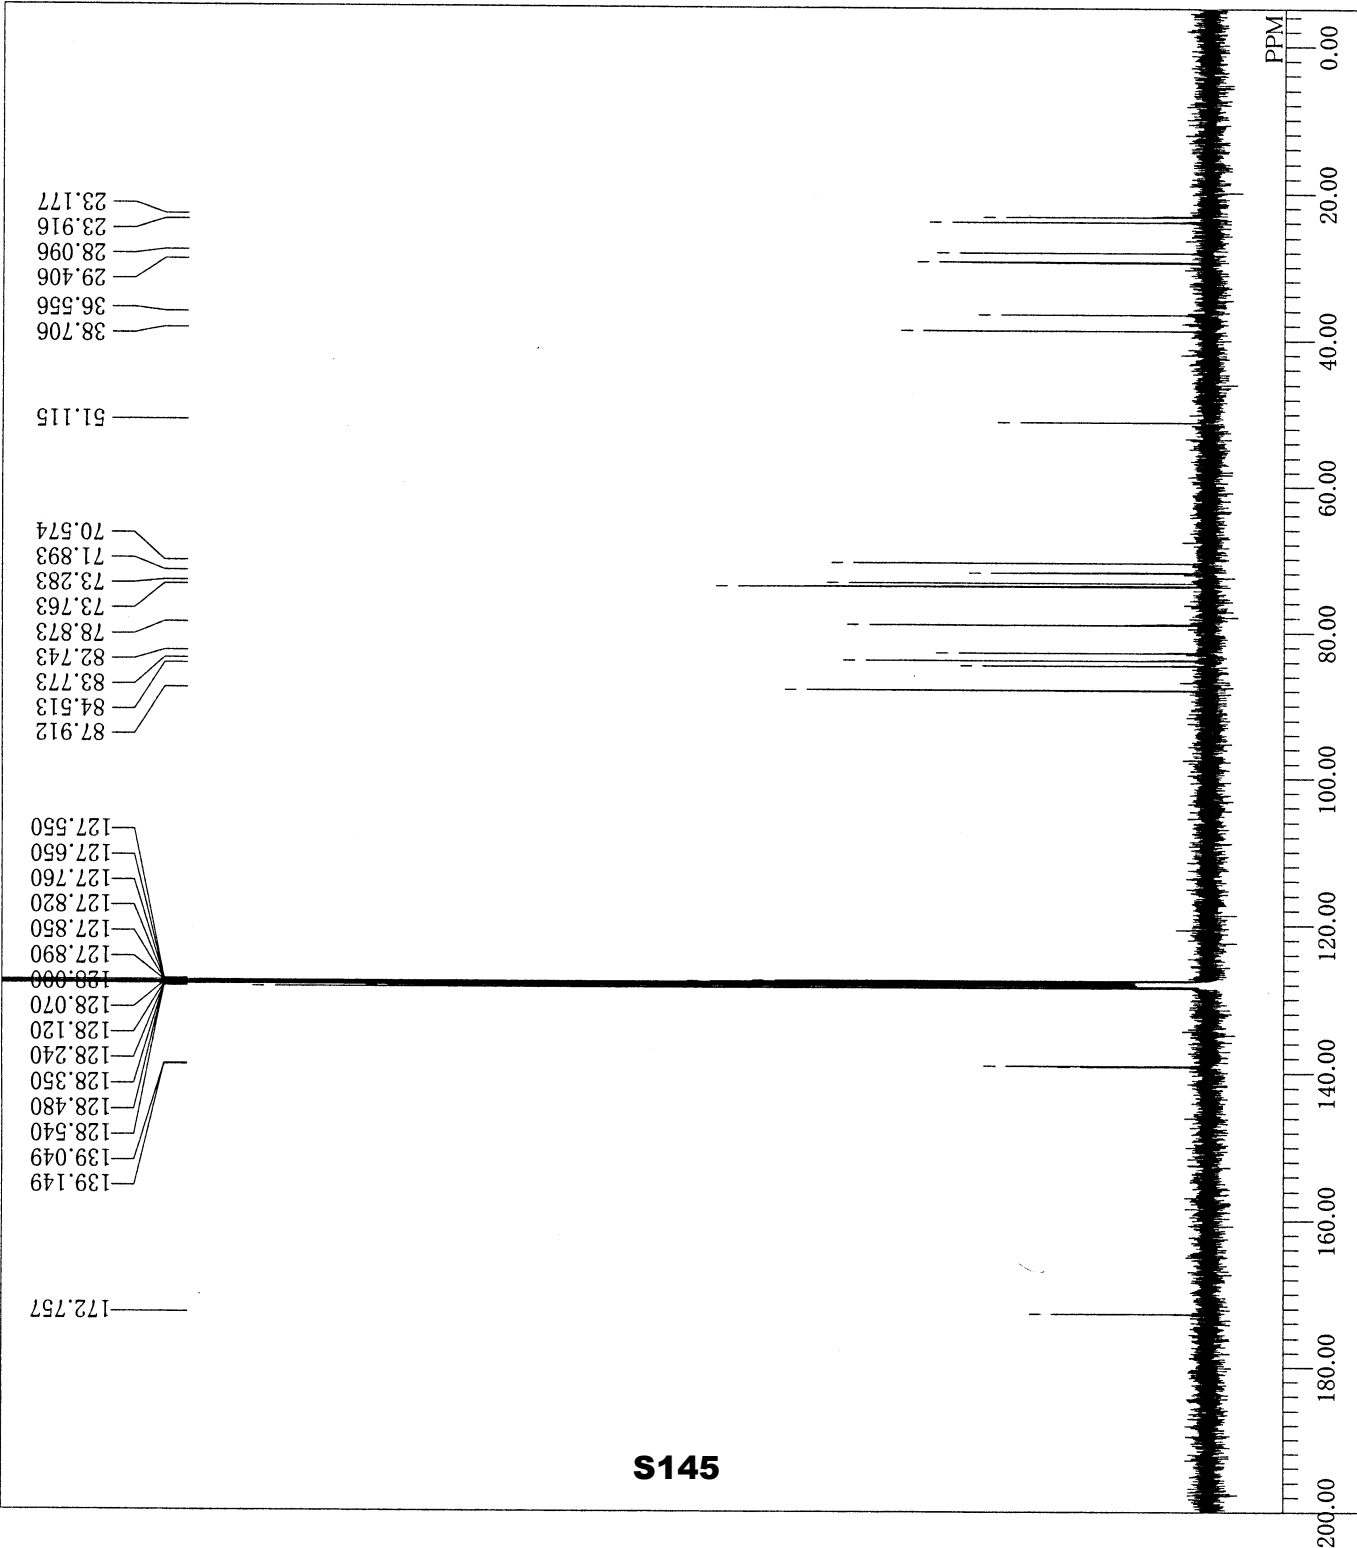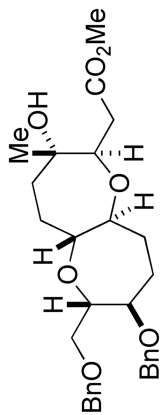

(100 MHz, C<sub>6</sub>D<sub>6</sub>)

HF15158

DFILE  
 COMINT  
 DATIM  
 OBNUC  
 EXMOD  
 OBFRQ  
 OBSET  
 OBFIN  
 POINT  
 FREQU  
 SCANS  
 ACQTM  
 PD  
 PW1  
 IRNUC  
 CTEMP  
 SLVNT  
 EXREF  
 BF  
 RGAIN

C:\Users\fuwa\HF15158CDCI3.1  
 HF15158  
 15-10-2004 14:44:50  
 1H  
 single\_pulse.ex2  
 399.78 MHz  
 4.19 KHz  
 7.29 Hz  
 8192  
 7503.00 Hz  
 16  
 1.0918 sec  
 30.0000 sec  
 5.85 usec  
 1H  
 22.8 c  
 CDCL3  
 0.00 ppm  
 0.12 Hz  
 42

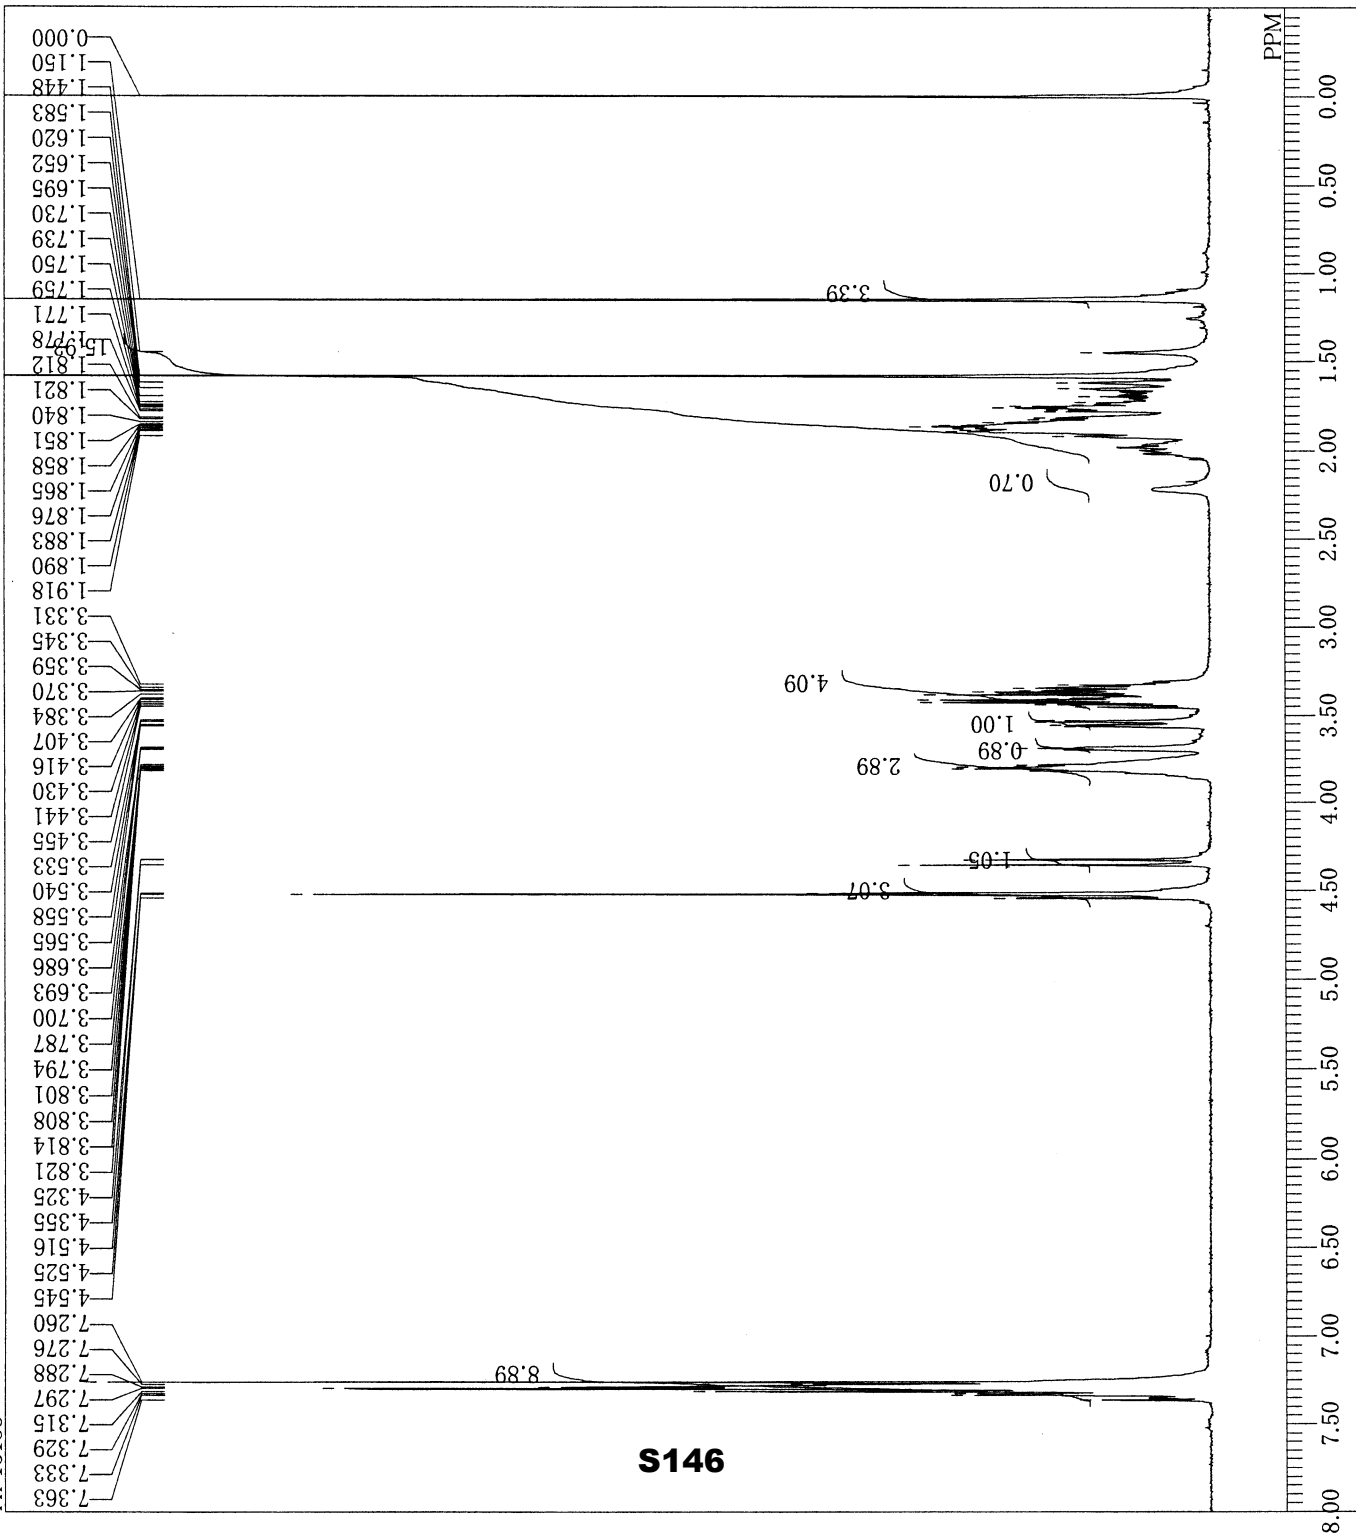

S146

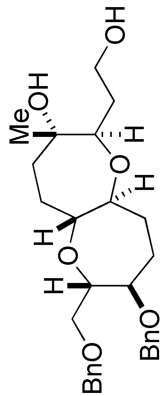

62

(400 MHz, CDCl<sub>3</sub>)

DFILE  
COMNT  
DATIM  
OBNUC  
EXMOD  
OBFRQ  
OBSET  
OBFIN  
POINT  
FREQU  
SCANS  
ACQTM  
PD  
PWI  
IRNUC  
CTEMP  
SLVNT  
EXREF  
BF  
RGAIN

C:\Users\fuwa\HF15158bcm.1  
HF15158  
15-10-2004 18:49:18  
13C  
single.pulse.dec  
100.53 MHz  
5.35 KHz  
5.86 Hz  
32768  
32938.08 Hz  
128  
0.9948 sec  
1.5000 sec  
3.13 usec  
1H  
23.1 c  
CDCL3  
77.00 ppm  
0.12 Hz  
60

38.302  
33.123  
28.733  
27.683  
23.993  
23.223

87.069  
85.929  
84.380  
82.460  
78.330  
77.320  
77.000  
76.720  
76.680  
74.580  
73.160  
71.420  
70.500  
61.211

138.366  
138.206  
128.317  
127.587  
127.547  
127.497

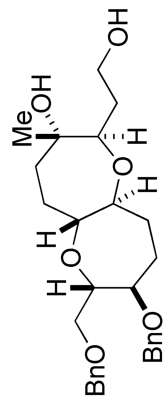

62

(100 MHz, CDCl<sub>3</sub>)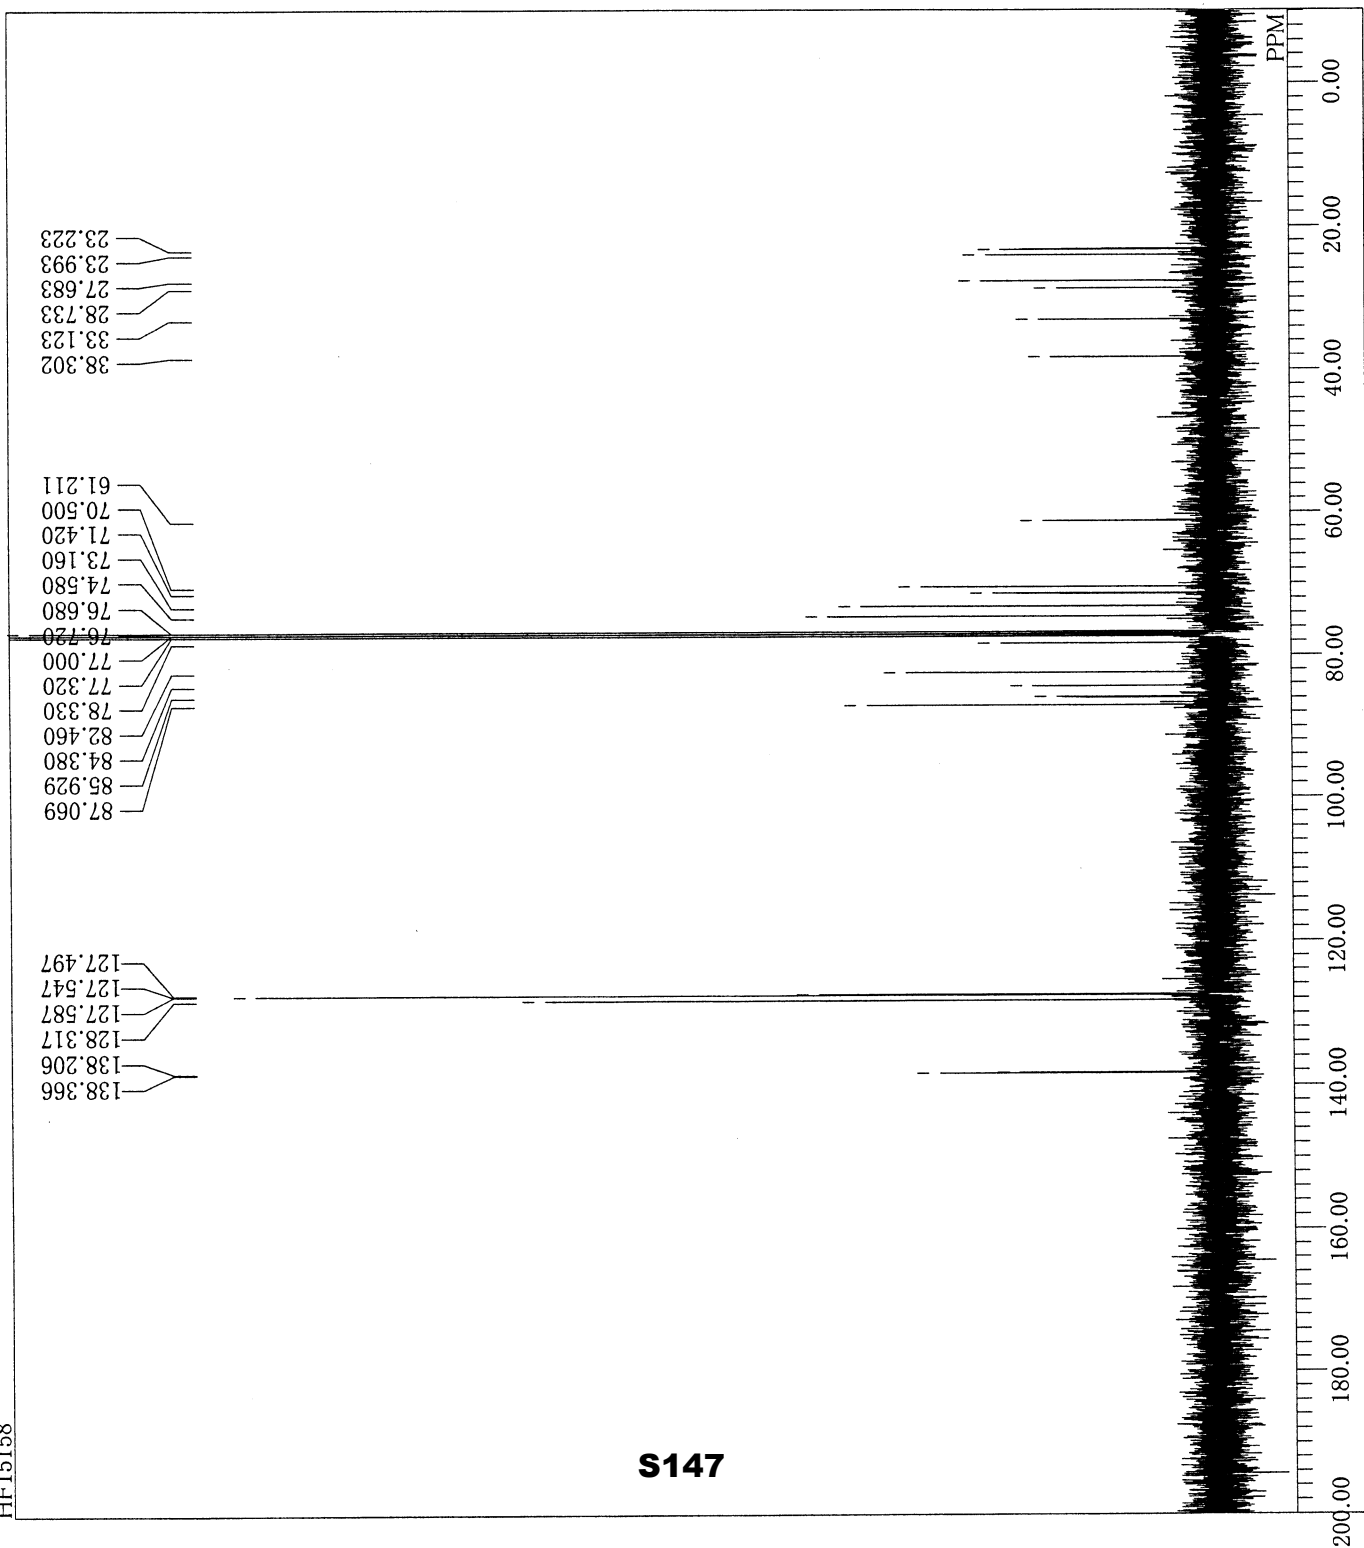



DFILE  
 COMNT  
 DATIM  
 OBNUC  
 EXMOD  
 OBFRO  
 OBSRT  
 OBFIN  
 POINT  
 FREQU  
 SCANS  
 ACQTM  
 PD  
 PW1  
 IRNUC  
 CTEMP  
 SLVNT  
 EXREF  
 BF  
 RGAIN

C:\Users\fuwa\HF15164.1  
 HF15164  
 13-10-2004 17:59:15  
 1H  
 single.pulse.ex2  
 399.78 MHz  
 4.19 KHz  
 7.29 Hz  
 8192  
 7503.00 Hz  
 16  
 1.0918 sec  
 30.0000 sec  
 5.85 usec  
 1H  
 23.0 c  
 C6D6  
 7.15 ppm  
 0.12 Hz  
 40

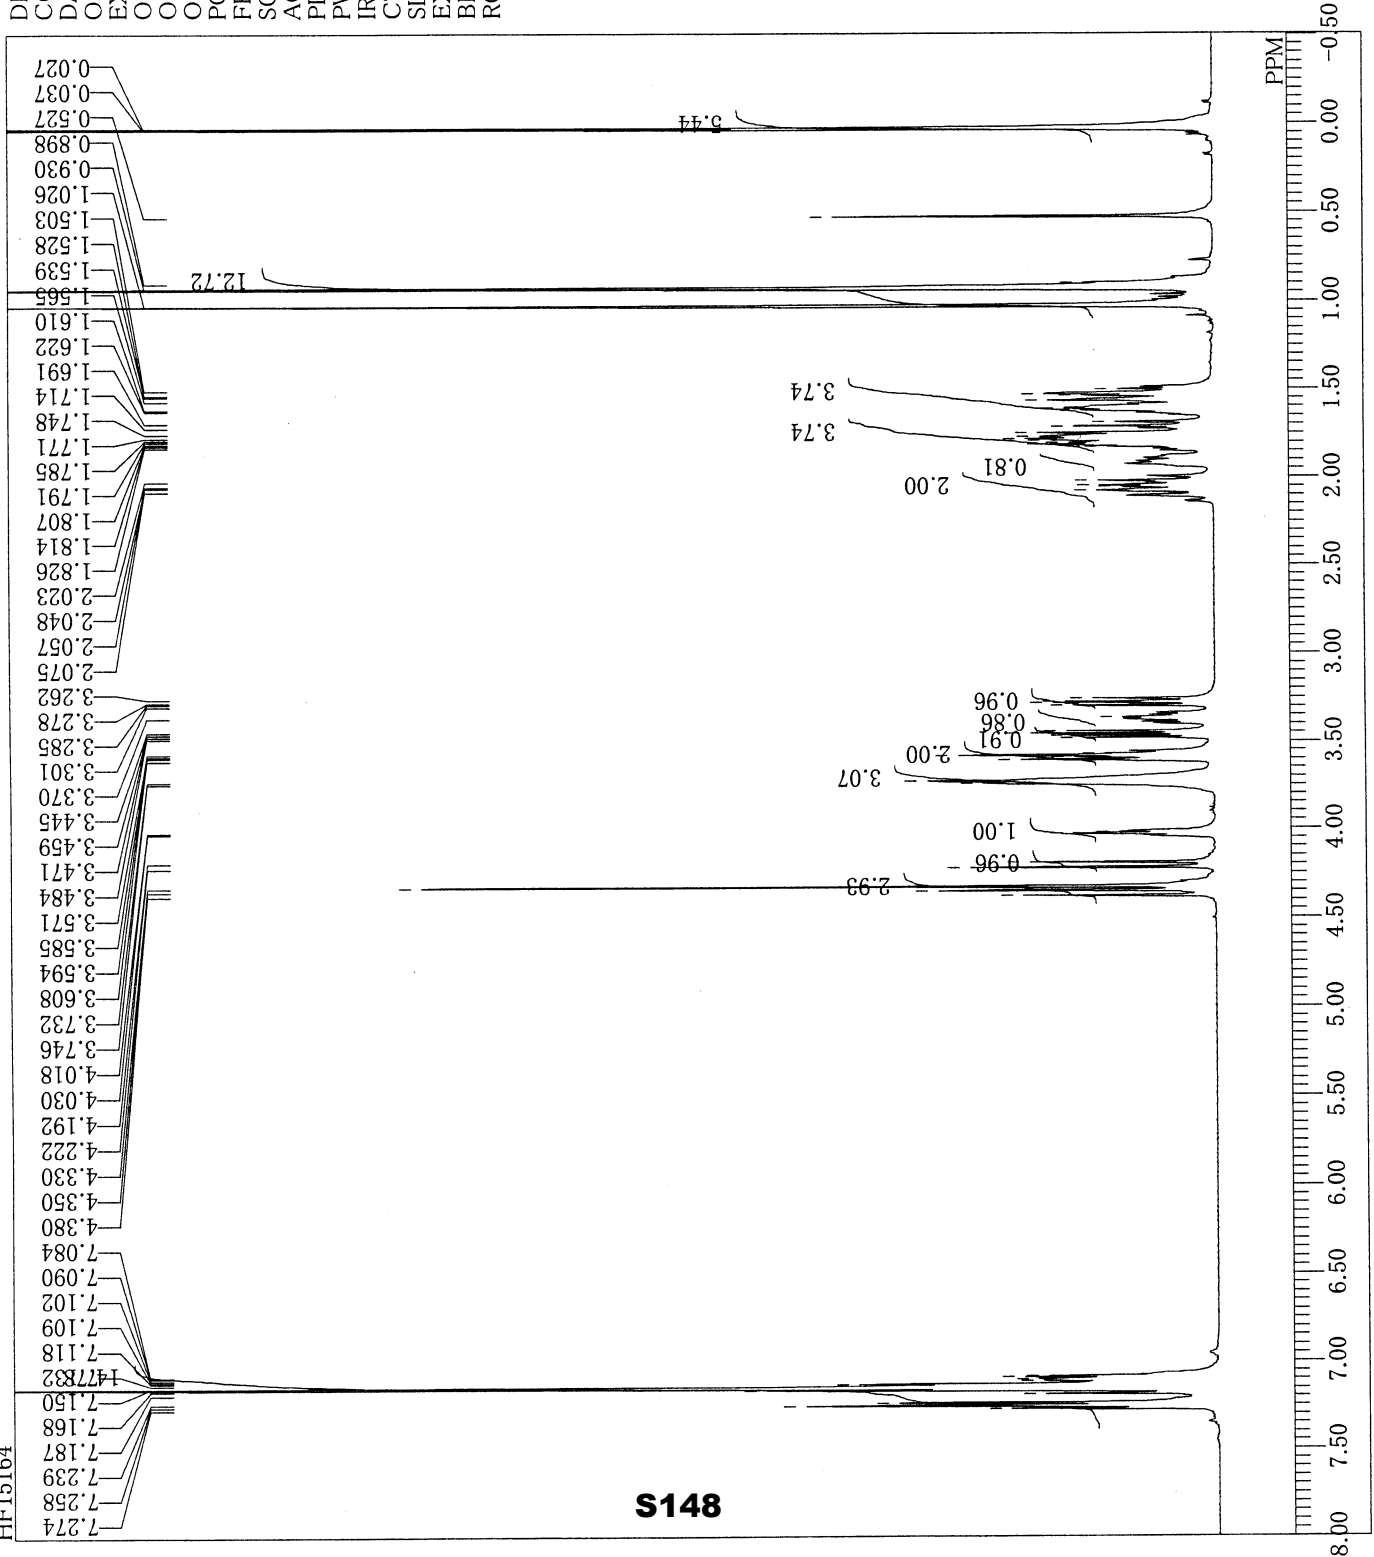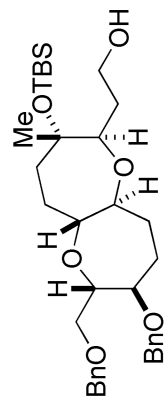

63

(400 MHz, C<sub>6</sub>D<sub>6</sub>)

DFILE  
COMNT  
DATIM  
OBNUC  
EXMOD  
OBFRQ  
OBSET  
OBFIN  
POINT  
FREQU  
SCANS  
ACQTM  
PD  
PW1  
IRNUC  
CTEMP  
SLVNT  
EXREF  
BF  
RGAIN

C:\Users\yfuwa\HF15164bcm.1  
HF15164  
13-10-2004 18:18:13  
13C  
single\_pulse\_dec  
100.53 MHz  
5.35 KHz  
5.86 Hz  
32768  
32938.08 Hz  
384  
0.9948 sec  
1.5000 sec  
3.13 usec  
1H 23.5 c  
C6D6  
128.00 ppm  
0.12 Hz  
60

139.119  
138.959  
128.530  
128.360  
128.240  
128.120  
128.070  
128.000  
127.890  
127.840  
127.760  
127.610  
87.623  
86.763  
84.033  
82.473  
78.813  
77.573  
73.343  
71.923  
70.614  
61.374  
37.916  
33.426  
29.326  
28.086  
25.986  
24.416  
23.147  
18.277  
-2.052  
-2.202

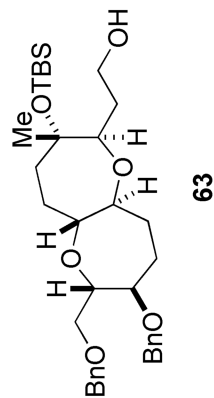

(100 MHz, C<sub>6</sub>D<sub>6</sub>)

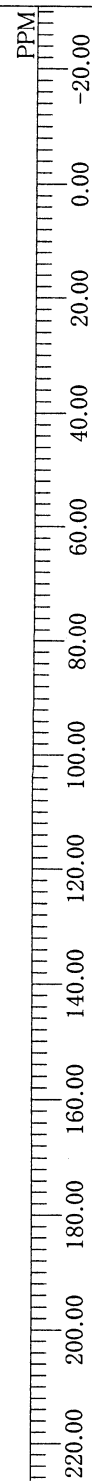

HF15167

DFILE  
 COMNT  
 DATIM  
 OBNUC  
 EXMOD  
 OBFRQ  
 OBSET  
 OBFIN  
 POINT  
 FREQU  
 SCANS  
 ACQTM  
 PD  
 PW1  
 IRNUC  
 CTEMP  
 SLVNT  
 EXREF  
 BF  
 RGAIN

C:\Users\Yfuwa\HF15167.1  
 HF15167  
 18-10-2004 14:46:34  
 1H  
 single\_pulse.ex2  
 399.78 MHz  
 4.19 KHz  
 7.29 Hz  
 8192  
 7503.00 Hz  
 16  
 1.0918 sec  
 30.0000 sec  
 5.85 usec  
 1H  
 22.9 c  
 C6D6  
 7.15 ppm  
 0.12 Hz  
 36

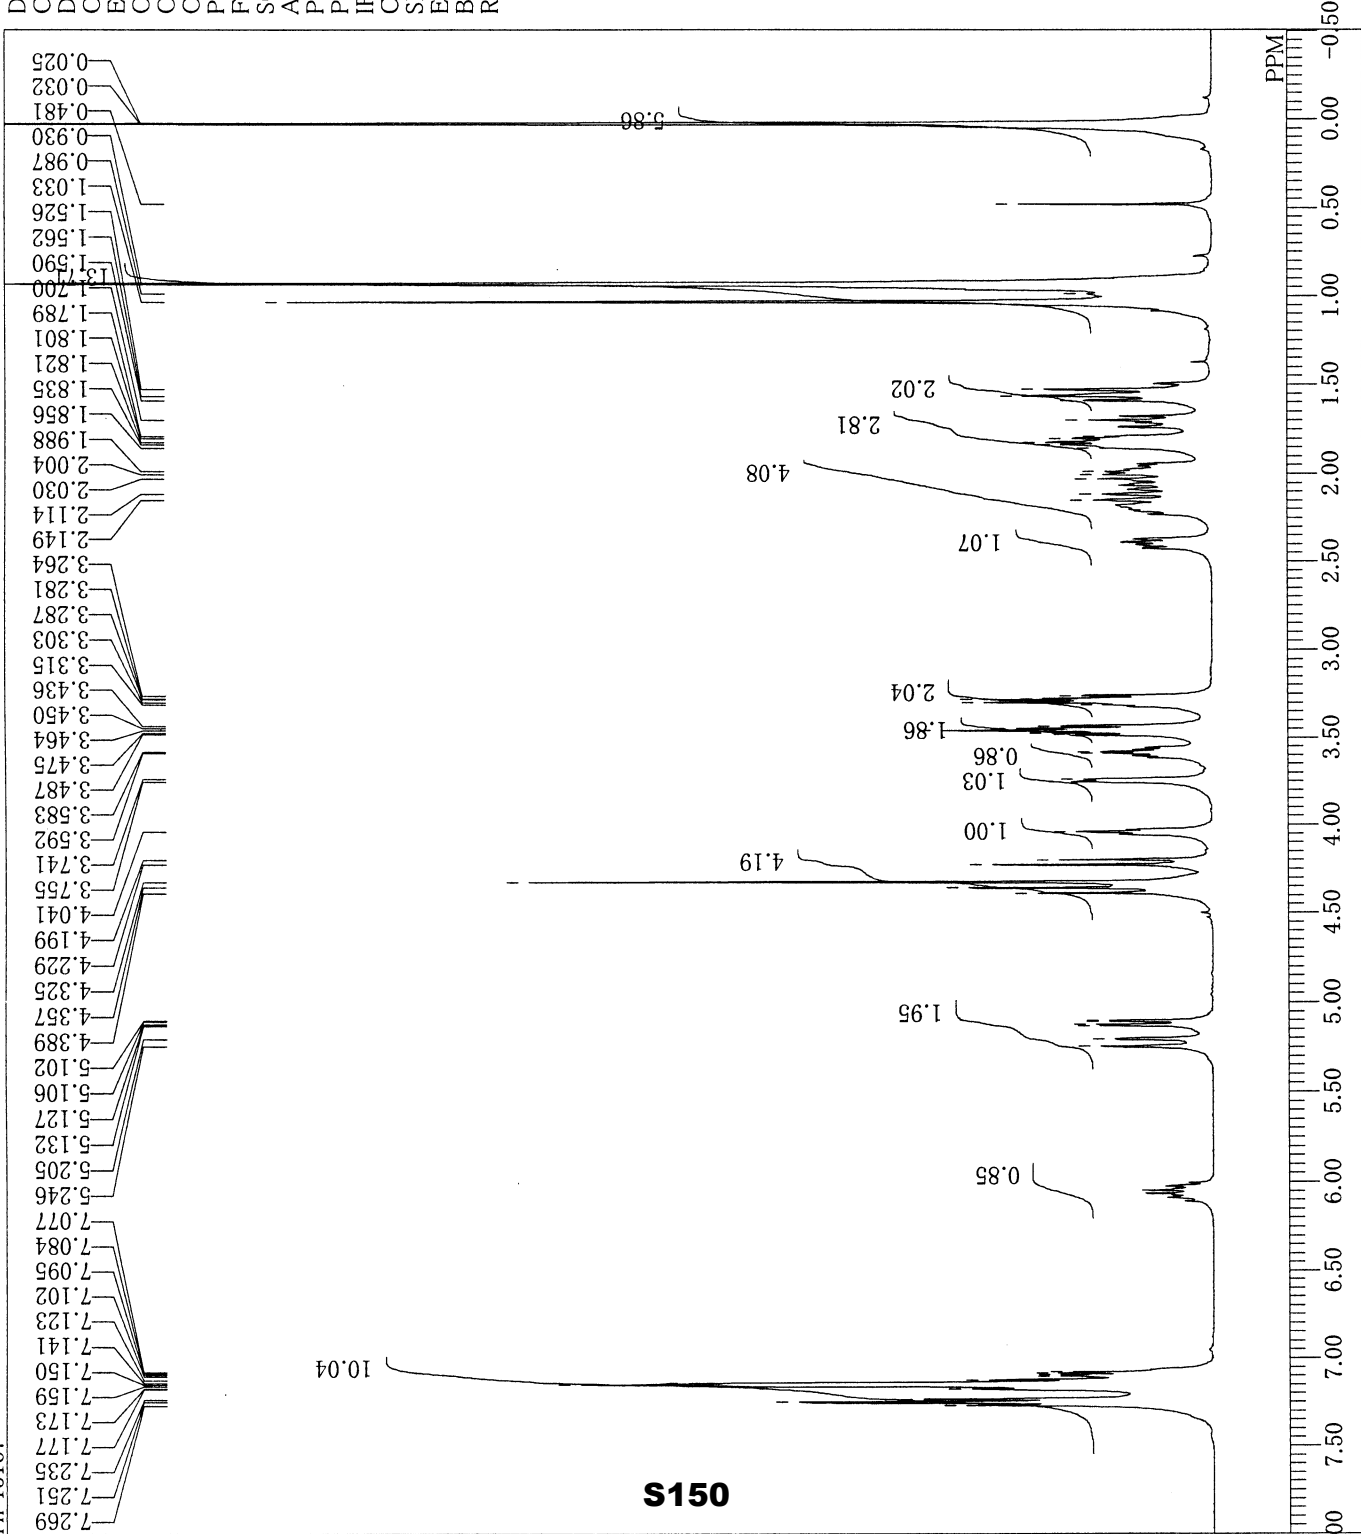

S150

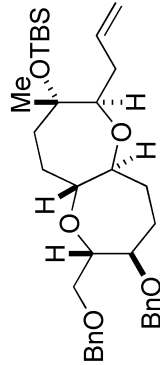

64

(400 MHz, C<sub>6</sub>D<sub>6</sub>)

DFILE  
 COMNT  
 DATIM  
 OBNUC  
 EXMOD  
 OBFRQ  
 OBSST  
 OBFIN  
 POINT  
 FREQU  
 SCANS  
 ACQTM  
 PD  
 PW1  
 IRNUC  
 CTEMP  
 SLVNT  
 EXREF  
 BF  
 RGAIN

C:\Users\yfuwa\HF15167bcm.1  
 HF15167  
 18-10-2004 14:57:52  
 13C  
 single\_pulse\_dec  
 100.53 MHz  
 5.35 KHz  
 5.86 Hz  
 32768  
 32938.08 Hz  
 192  
 0.9948 sec  
 1.5000 sec  
 3.13 usec  
 1H  
 23.4 c  
 C6D6  
 128.00 ppm  
 0.12 Hz  
 60

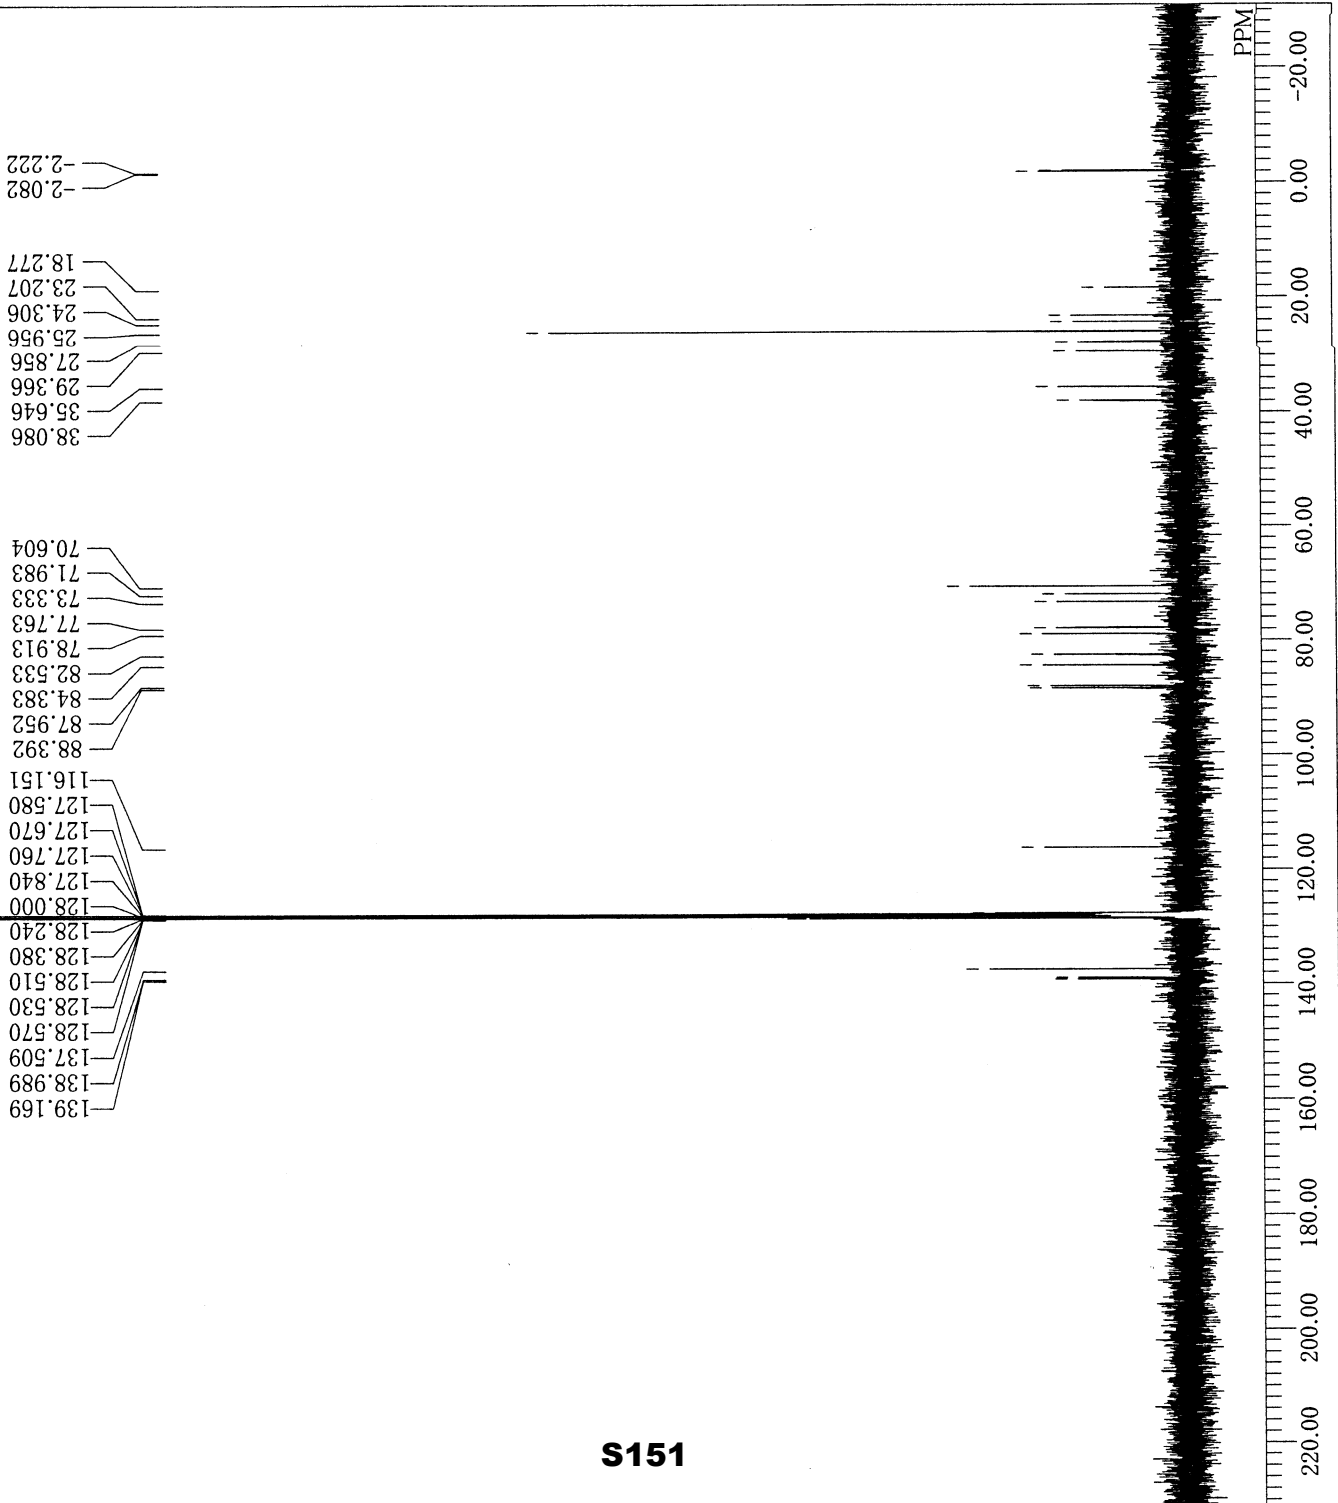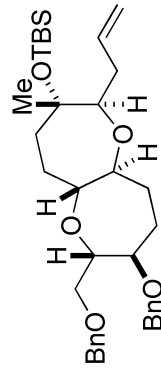

64

(100 MHz, C<sub>6</sub>D<sub>6</sub>)

HF15172

S152

DFILE  
 COMNT  
 DATIM  
 OBNUC  
 EXMOD  
 OBFRQ  
 OBSSET  
 OBFIN  
 POINT  
 FREQU  
 SCANS  
 ACQTM  
 PD  
 PW1  
 IRNUC  
 CRTEMP  
 SLVNT  
 EXREF  
 BF  
 RGAIN

C:\Users\fuwa\HF15172.1  
 HF15172  
 19-10-2004 18:13:58  
 1H  
 single\_pulse.ex2  
 399.78 MHz  
 4.19 KHz  
 7.29 Hz  
 8192  
 7503.00 Hz  
 16  
 1.0918 sec  
 30.0000 sec  
 5.85 usec  
 1H  
 22.8 c  
 C6D6  
 7.15 ppm  
 0.12 Hz  
 36

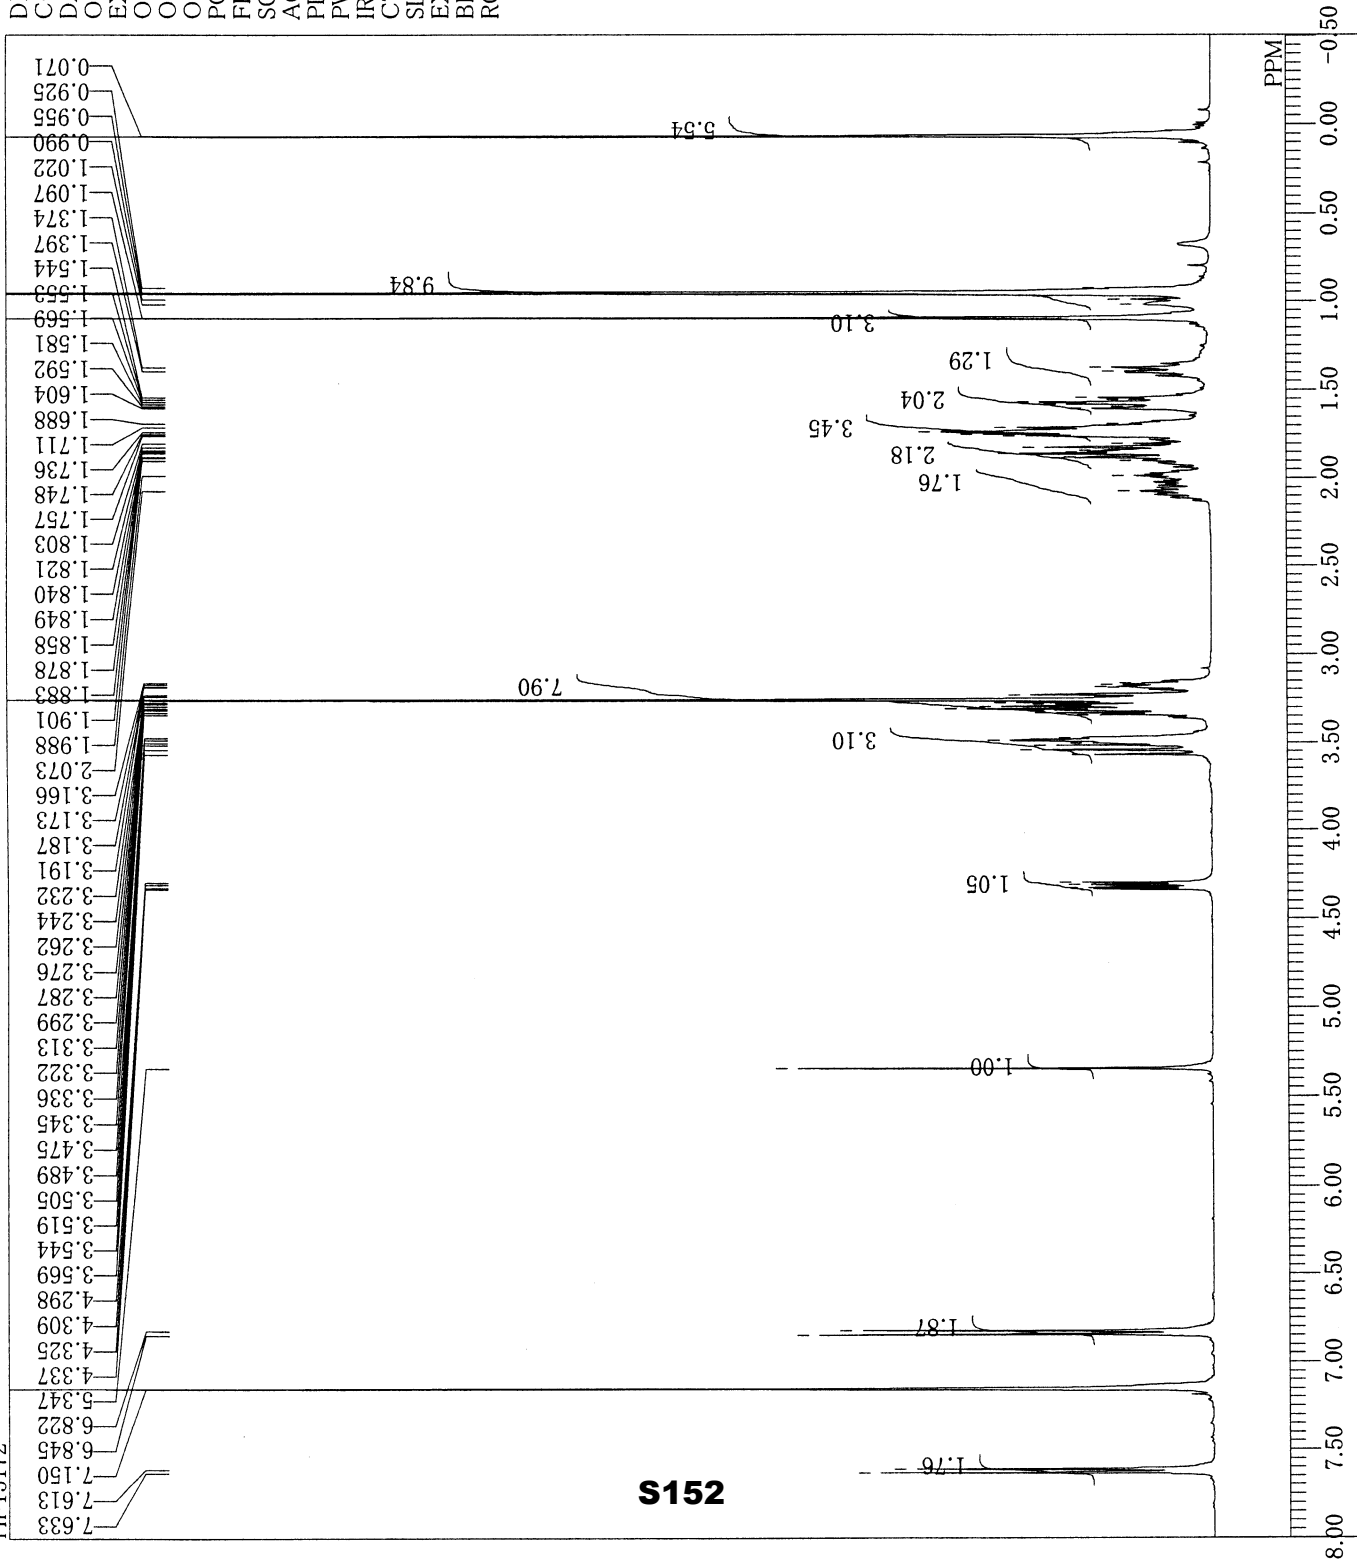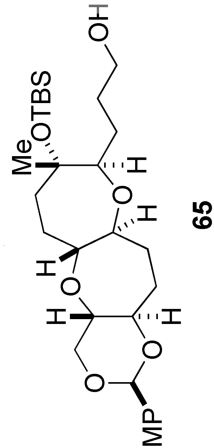

(400 MHz, C<sub>6</sub>D<sub>6</sub>)

DFILE  
COMNT  
DATIM  
OBNUC  
EXMOD  
OBFRQ  
OBSET  
OBFIN  
POINT  
FREQU  
SCANS  
ACQTM  
PD  
PW1  
IRNUC  
CTEMP  
SLVNT  
EXREF  
BF  
RGAIN

C:\Users\fuwa\HF15172bcm.1  
HF15172  
19-10-2004 18:24:53  
13C  
single\_pulse\_dec  
100.53 MHz  
5.35 KHz  
5.86 Hz  
32768  
32938.08 Hz  
192  
0.9948 sec  
1.5000 sec  
3.13 usec  
1H 23.6 c  
C6D6  
128.00 ppm  
0.12 Hz  
60

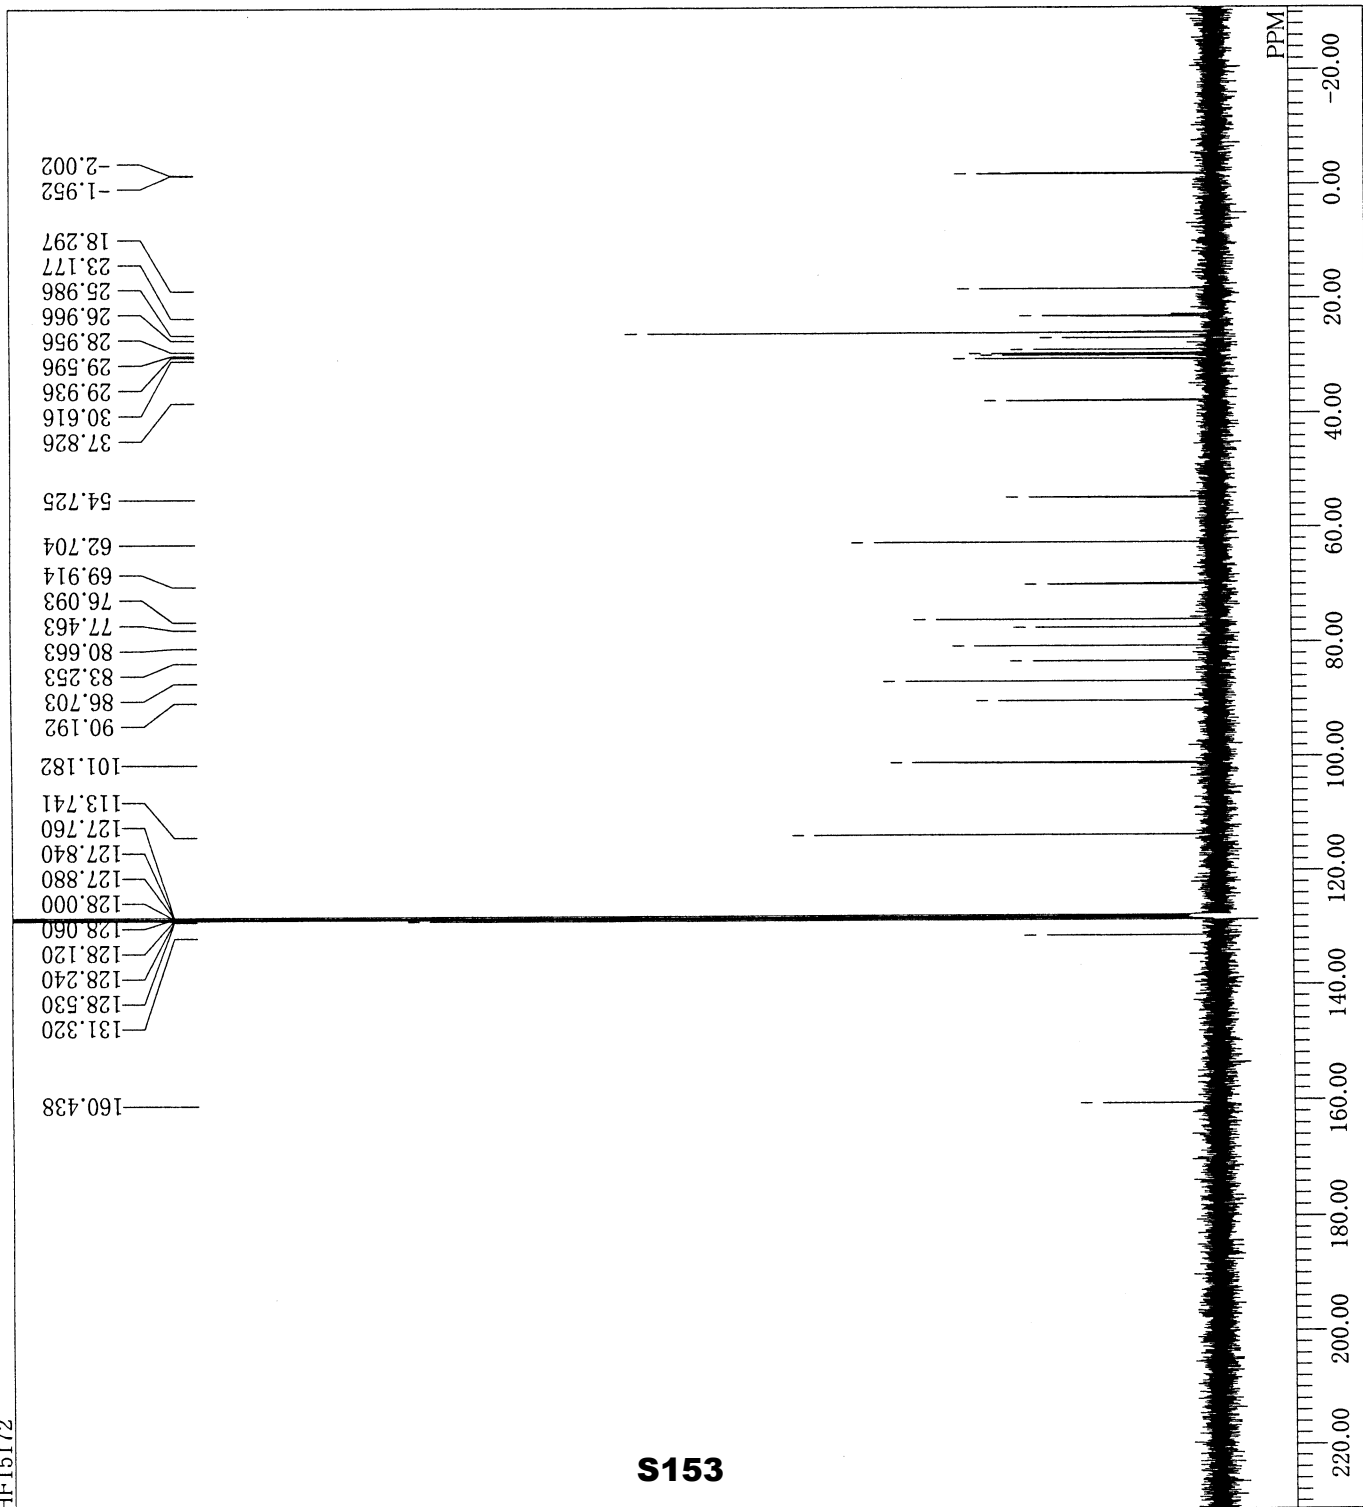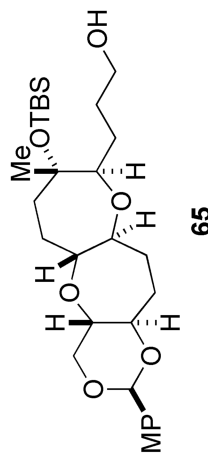

(100 MHz, C<sub>6</sub>D<sub>6</sub>)

HF15173

DFIL E  
 COMNT  
 DATIM  
 OBNUC  
 EXMOD  
 OBFRO  
 OBSET  
 OBFIN  
 POINT  
 FREQU  
 SCANS  
 ACQTM  
 PD  
 PW1  
 IRNUC  
 CTEMP  
 SLVNT  
 EXREF  
 BF  
 RGAIN

C:\Users\fluwa\HF15173.1  
 HF15173  
 20-10-2004 18:15:36  
 1H  
 single\_pulse.ex2  
 399.78 MHz  
 4.19 KHz  
 7.29 Hz  
 8192  
 7503.00 Hz  
 16  
 1.0918 sec  
 30.0000 sec  
 5.85 usec  
 1H 22.7 c  
 C6D6  
 7.15 ppm  
 0.12 Hz  
 36

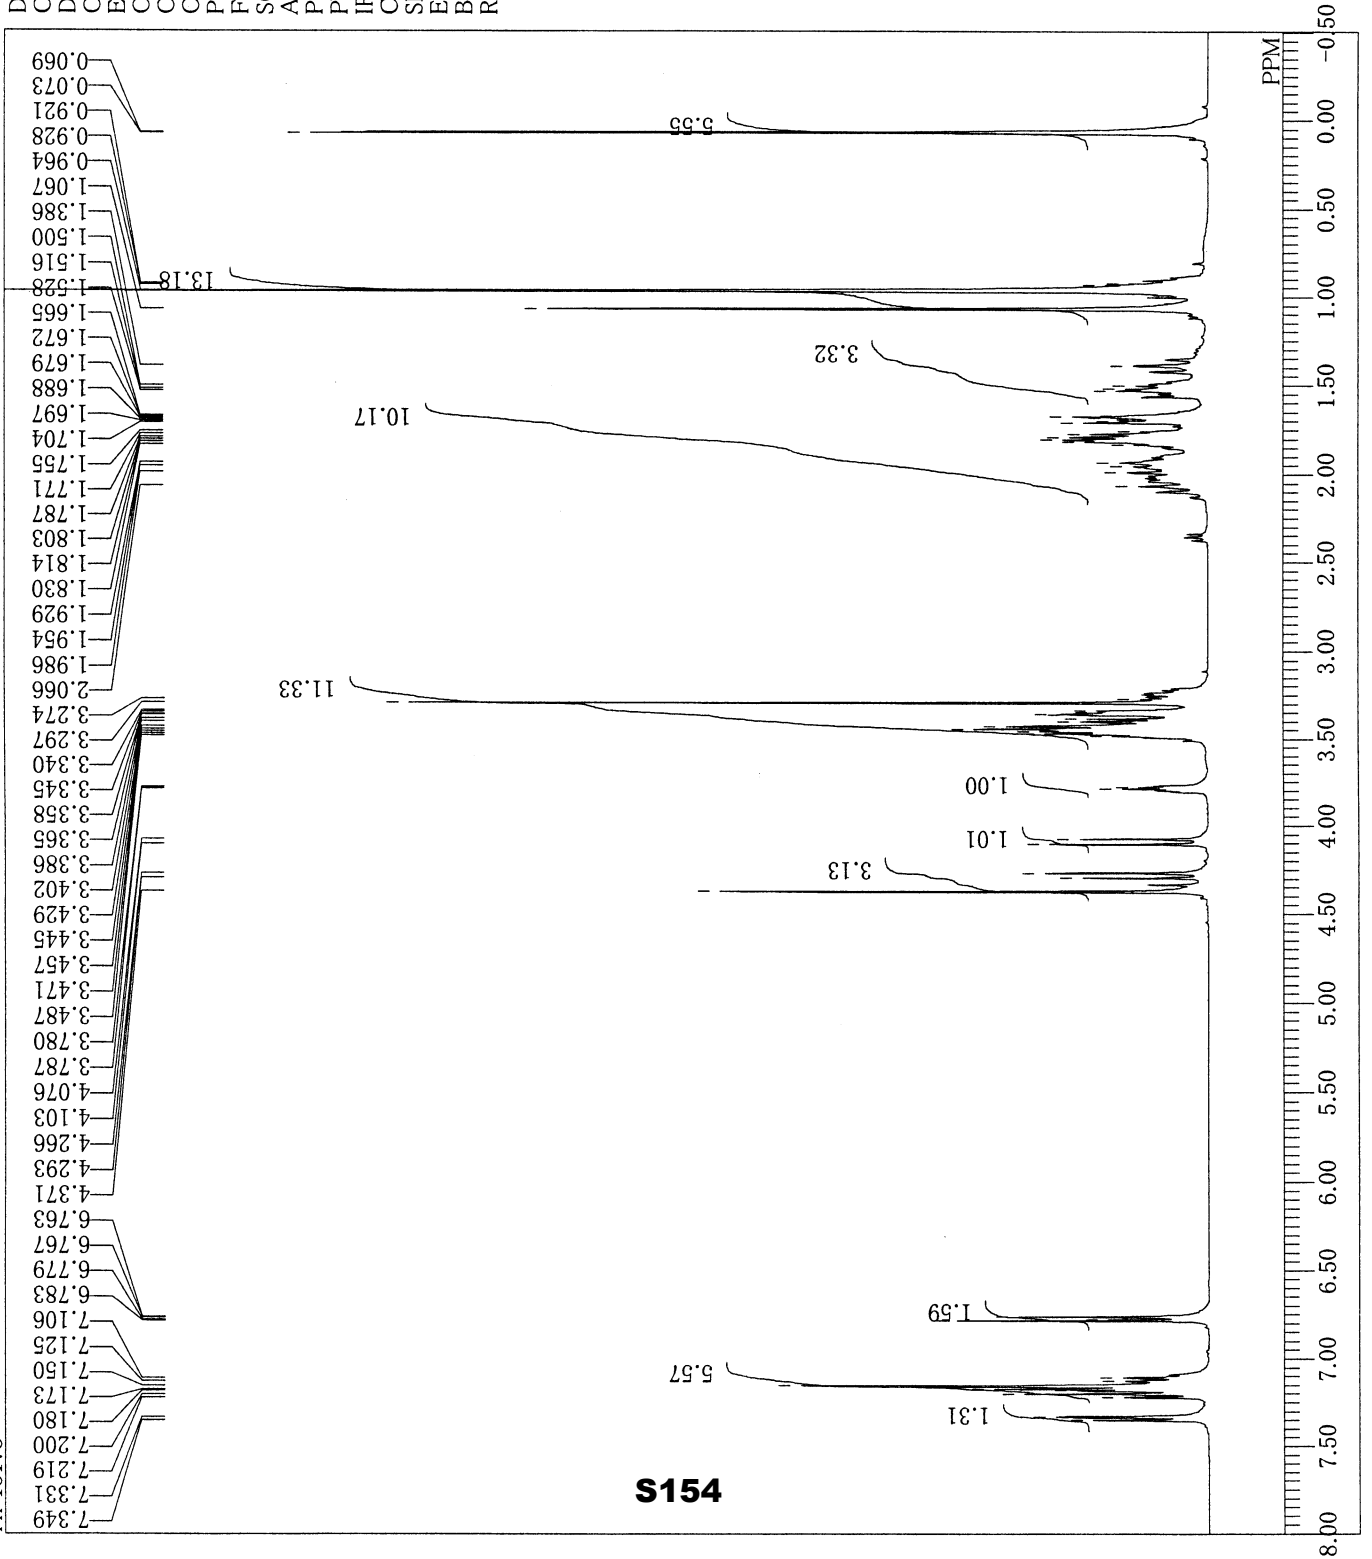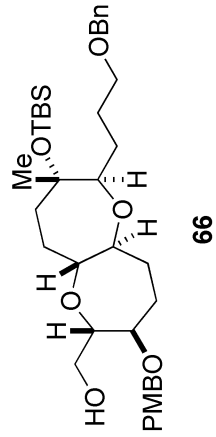

(400 MHz, C<sub>6</sub>D<sub>6</sub>)

DFILE  
 COMNT  
 DATIM  
 OBNUC  
 EXMOD  
 OBFRQ  
 OBSET  
 OBFIN  
 POINT  
 FREQU  
 SCANS  
 ACQTM  
 PD  
 PW1  
 IRNUC  
 CTEMP  
 SLVNT  
 EXREF  
 BF  
 RGAIN

C:\Users\fluwa\HF15173bcm.1  
 HF15173  
 20-10-2004 18:26:27  
 13C  
 single\_pulse\_dec  
 100.53 MHz  
 5.35 KHz  
 5.86 Hz  
 32768  
 32938.08 Hz  
 192  
 0.9948 sec  
 1.5000 sec  
 3.13 usec  
 1H  
 23.4 c  
 C6D6  
 128.00 ppm  
 0.12 Hz  
 60

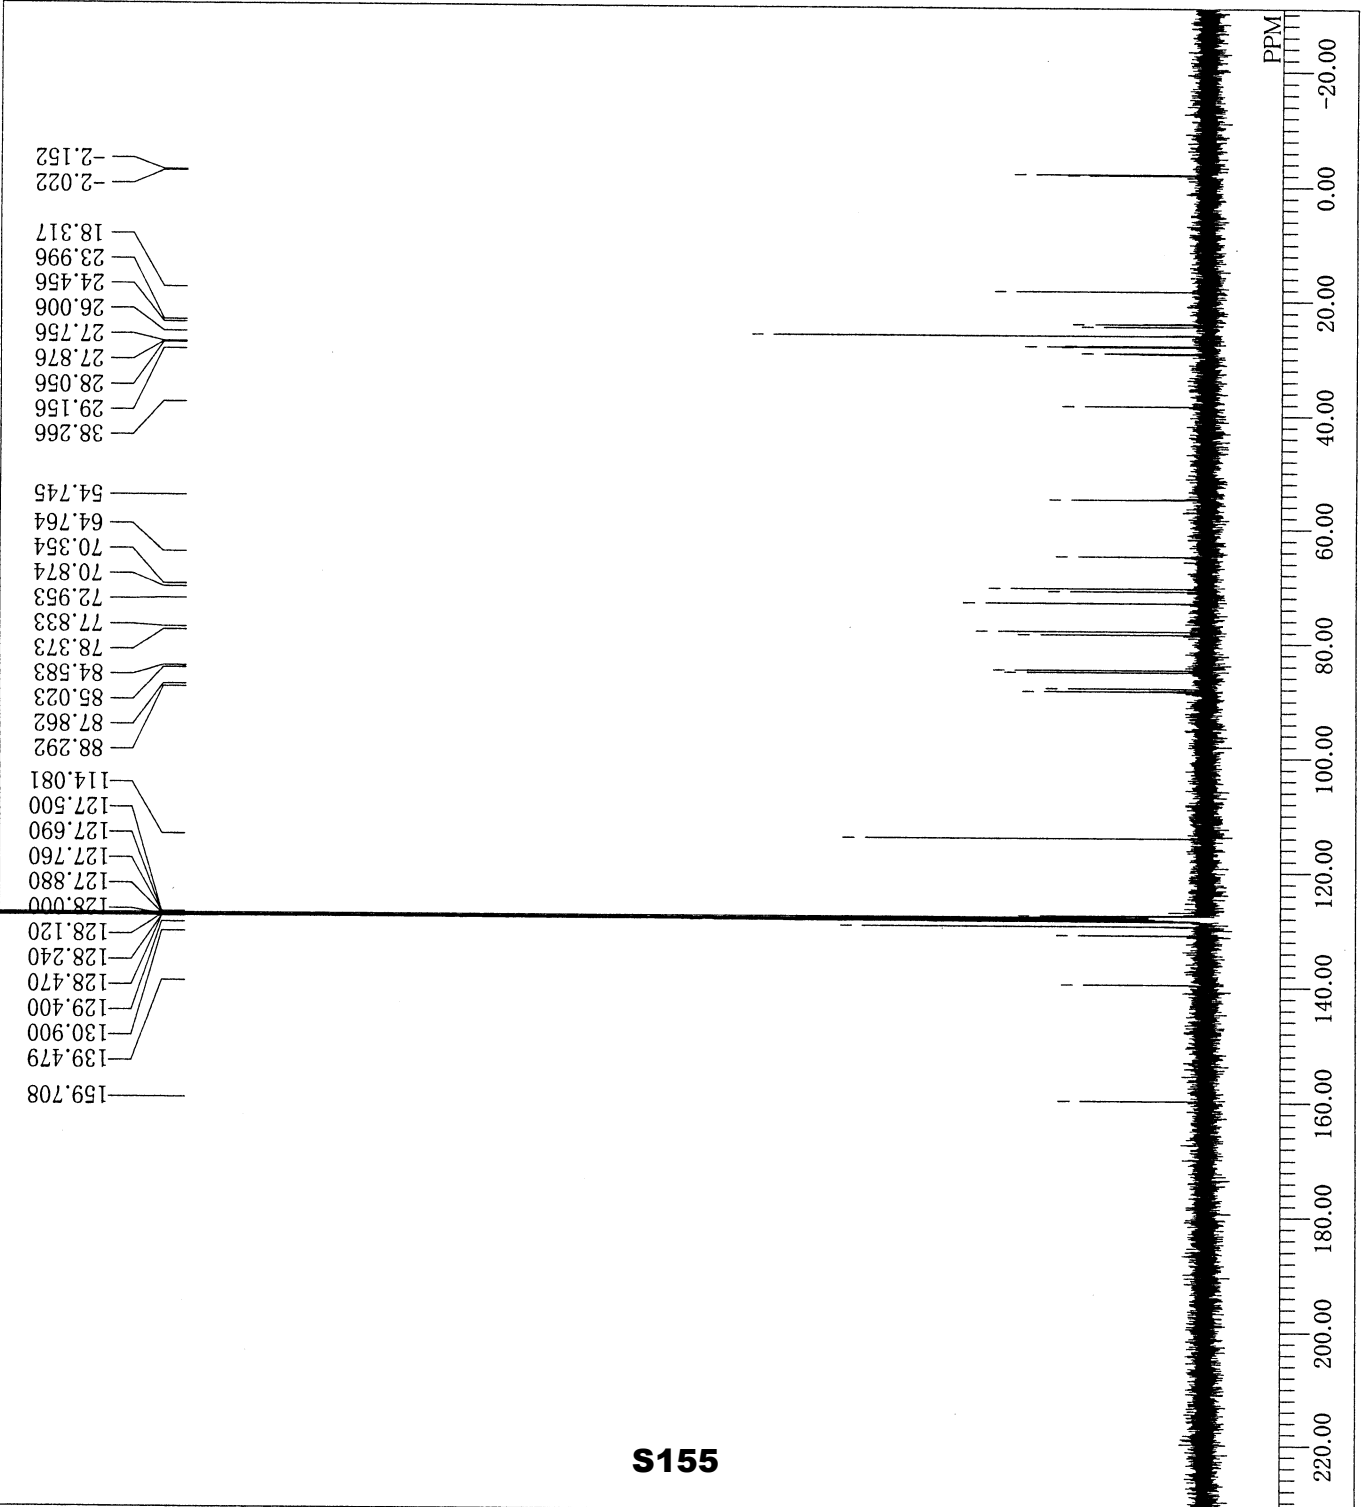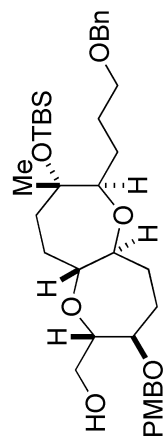

(100 MHz, C<sub>6</sub>D<sub>6</sub>)



Ebine III-30/C6D6

exp1 s2pul

|             |             |            |          |           |
|-------------|-------------|------------|----------|-----------|
| date        | Jan 11 2005 | dfrq       | 499.862  | DEC. & VT |
| solvent     | Benzene     | dn         | H1       |           |
| file        | exp         | dpwr       | 30       |           |
| ACQUISITION | exp         | dof        | 0        |           |
| sfrq        | 499.862     | dm         | nmh      |           |
| tn          | H1          | dmm        | C        |           |
| at          | 1.892       | dmf        | 200      |           |
| np          | 30272       | dseq       |          |           |
| sw          | 8000.0      | dres       | 1.0      |           |
| fb          | not used    | homo       | n        |           |
| bs          | 4           | temp       | 20.0     |           |
| tpwr        | 54          | PROCESSING |          |           |
| pw          | 2.5         | wffile     |          |           |
| d1          | 1.000       | proc       | lp       |           |
| tof         | -140.0      | fn         | not used |           |
| nt          | 8           | math       | f        |           |
| ct          | 8           | werr       | n        |           |
| alock       | not used    | wexp       | n        |           |
| gain        | not used    | wbs        | n        |           |
| FLAGS       |             | wnt        | wft      |           |
| il          | n           |            |          |           |
| in          | n           |            |          |           |
| dp          | y           |            |          |           |
| hs          | nn          |            |          |           |
| DISPLAY     |             |            |          |           |
| sp          | -250.0      |            |          |           |
| wp          | 4248.8      |            |          |           |
| vs          | 64          |            |          |           |
| sc          | 0           |            |          |           |
| wc          | 250         |            |          |           |
| h2mm        | 17.00       |            |          |           |
| is          | 2595.56     |            |          |           |
| rfl         | 5206.9      |            |          |           |
| rff         | 3574.0      |            |          |           |
| th          |             |            |          |           |
| ins         | 1.000       |            |          |           |
| ai          |             |            |          |           |
| ph          |             |            |          |           |

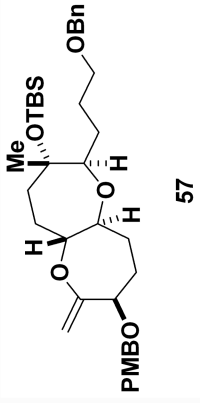

(500 MHz, C<sub>6</sub>D<sub>6</sub>)

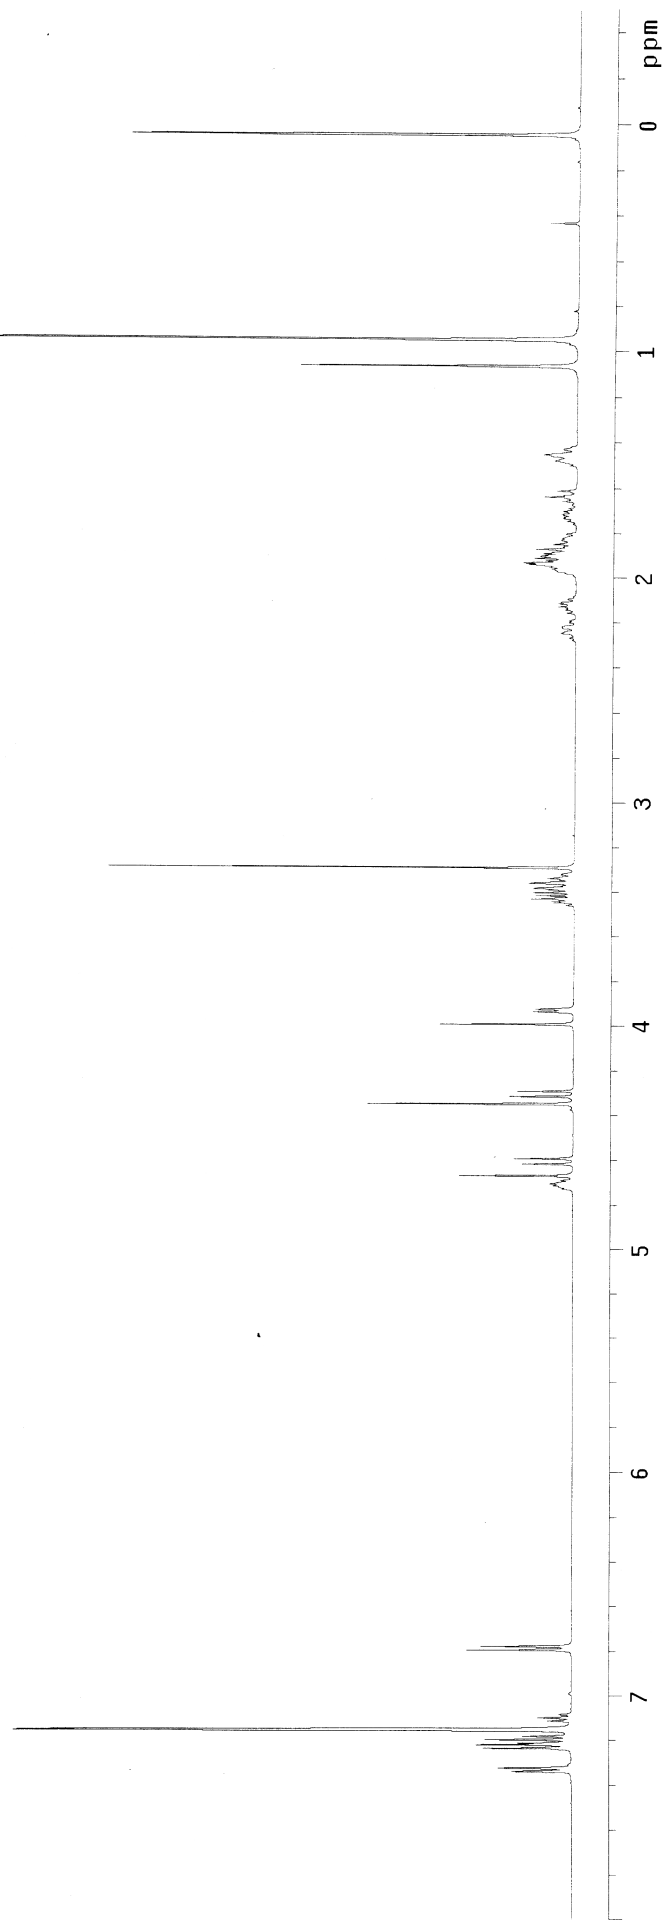

STANDARD PROTON PARAMETERS

exp1 s2pul

|                          |              |
|--------------------------|--------------|
| SAMPLE                   | DEC. & VT    |
| date Jun 21 2006         | dfrq 499.862 |
| solvent CDCl3            | H1           |
| file /export/home/~ dpwr | dn 30        |
| vnmr1/vnmrSYS/data~ dof  | 0            |
| /Sasaki_lab/Ebine/~ dm   | nnn          |
| ebineIII-122-H.fid       | dmm c        |
| ACQUISITION              | dmf 200      |
| sfrq 499.862             | dseq         |
| tn H1                    | dres 1.0     |
| at 1.892                 | homo n       |
| np 30272                 | temp 20.0    |
| sw 8000.0                | PROCESSING   |
| fb not used              | wtfile       |
| bs 4                     | proc lp      |
| tpwr 54                  | fn not used  |
| pw 2.5                   | math f       |
| d1 1.000                 |              |
| tof -140.0               | werr         |
| nt 64                    | wexp         |
| ct 64                    | wbs          |
| alock n                  | wnt          |
| gain not used            | wft          |

|         |          |       |
|---------|----------|-------|
| il      | n        | FLAGS |
| in      | n        |       |
| dp      | y        |       |
| hs      | nn       |       |
| DISPLAY |          |       |
| sp      | -250.4   |       |
| wp      | 4248.8   |       |
| vs      | 154      |       |
| sc      | 0        |       |
| wc      | 250      |       |
| hzmnm   | 17.00    |       |
| is      | 23283.22 |       |
| rfl     | 5277.2   |       |
| rfp     | 3619.0   |       |
| th      | 7        |       |
| ins     | 1.000    |       |
| nm      | ph       |       |

S157

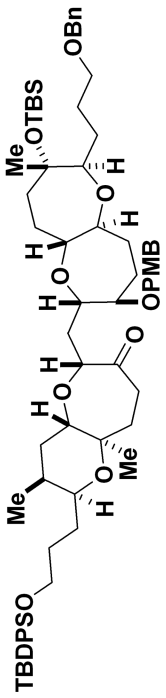

70

(500 MHz, CDCl<sub>3</sub>)

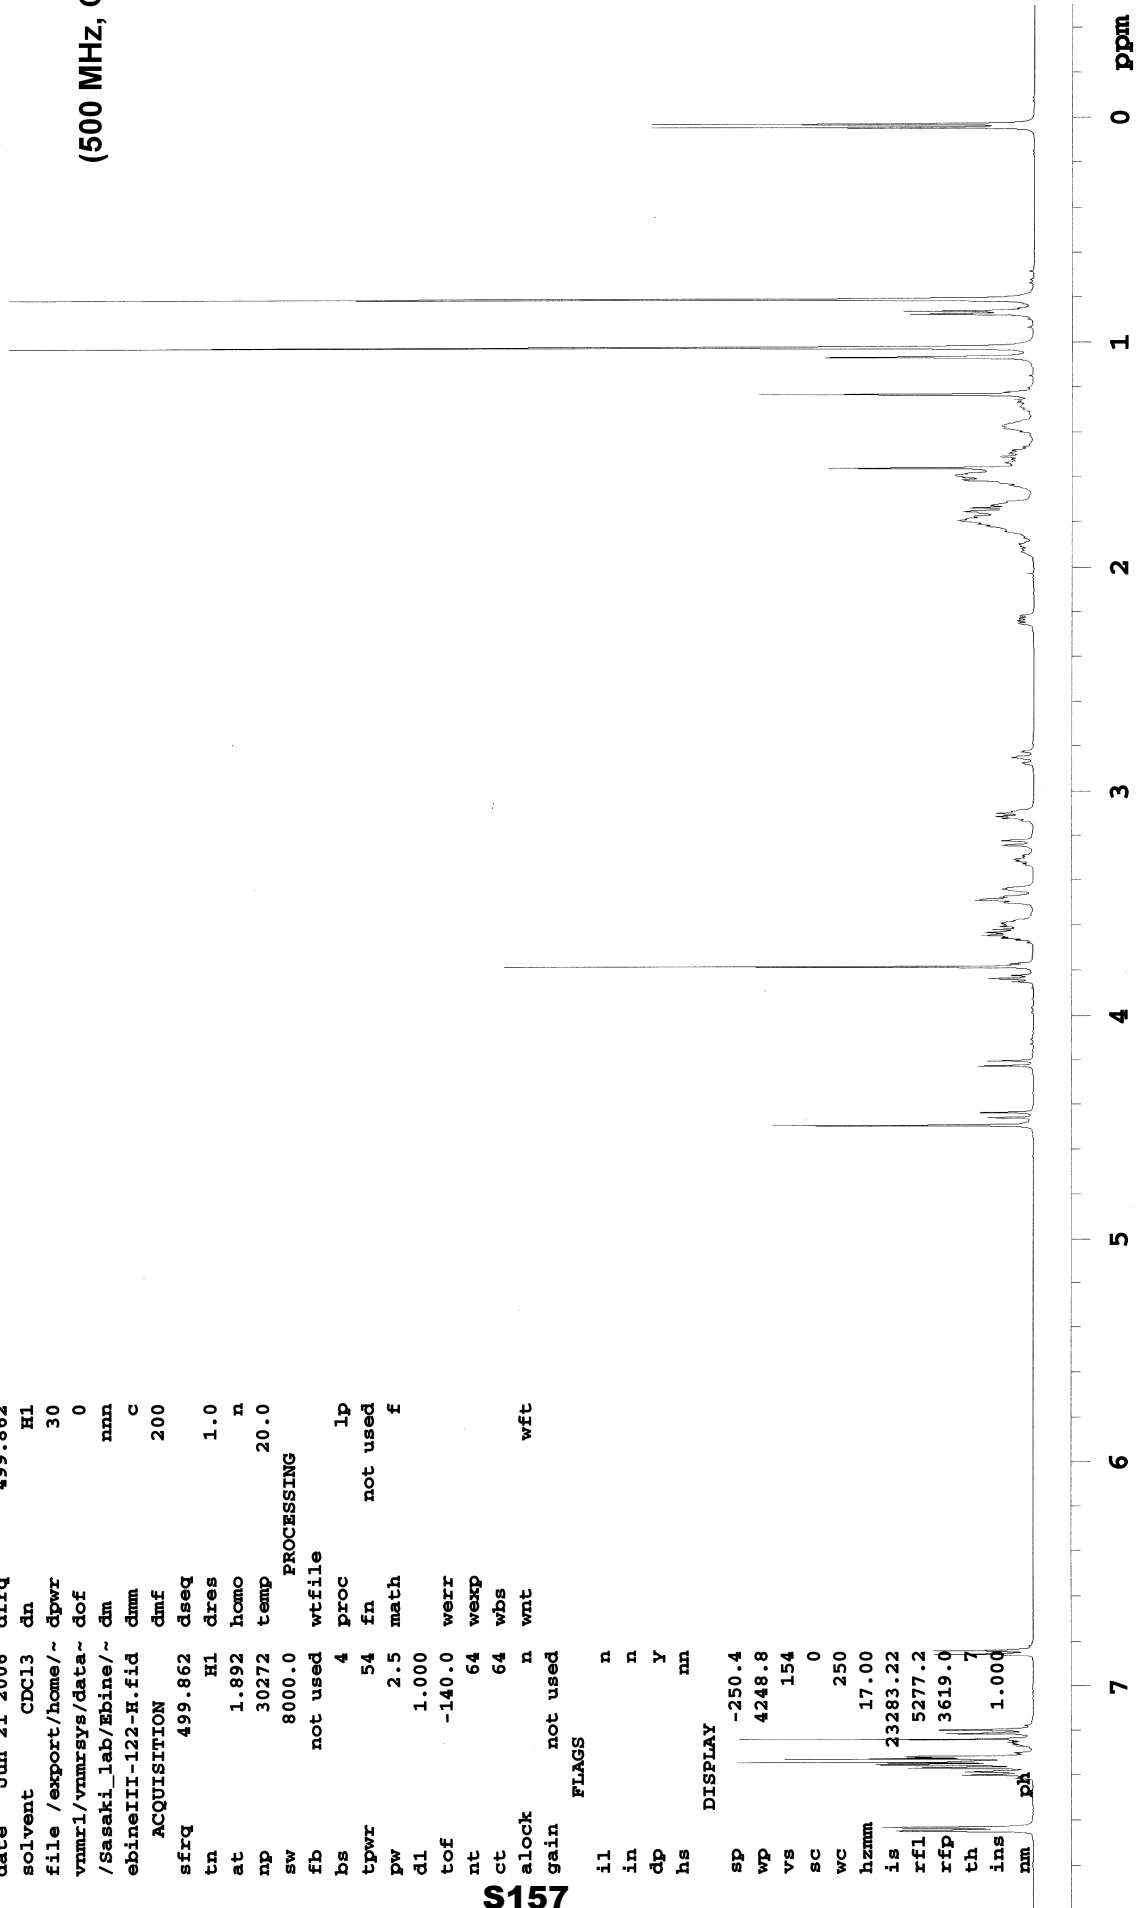

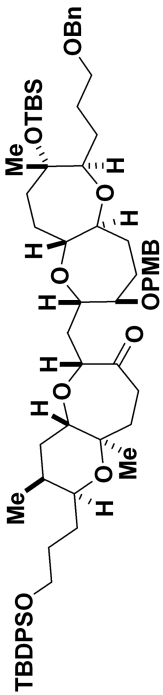

70

(125 MHz, CDCl<sub>3</sub>)

STANDARD CARBON PARAMETERS

```

exp1 s2pul
SAMPLE DEC. & VT
date Jun 21 2006 dfrq 499.862
solvent CDCl3 dn H1
file /export/home/~ dpwr 27
vnmr1/vnmrSYS/data~ dof 0
/Sasaki_lab/Ebine/~ dm YYY
ebineIII-122-C.fid dmm w
ACQUISITION dmf 12579
sfrq 125.704 dseq
tn C13 dres 1.0
at 1.298 homo n
np 97994 temp 20.0
sw 37735.8 PROCESSING
fb not used lb 0.50
bs 16 wtfile
tpwr 61 proc ft
pw 5.3 fn 131072
dl 0.700 math f
tof 1883.8
nt 5120 werr
ct 608 wexp wft
alock n wbs wft
gain 56 wnt
  
```

FLAGS

```

il n
in n
dp Y
hs nn
DISPLAY
sp -1257.1
wp 28908.1
vs 128
sc 0
wc 250
hzmm 115.63
is 500.00
rfl 14753.5
rfp 9678.1
th 12
ins 100.000
nm ph
  
```

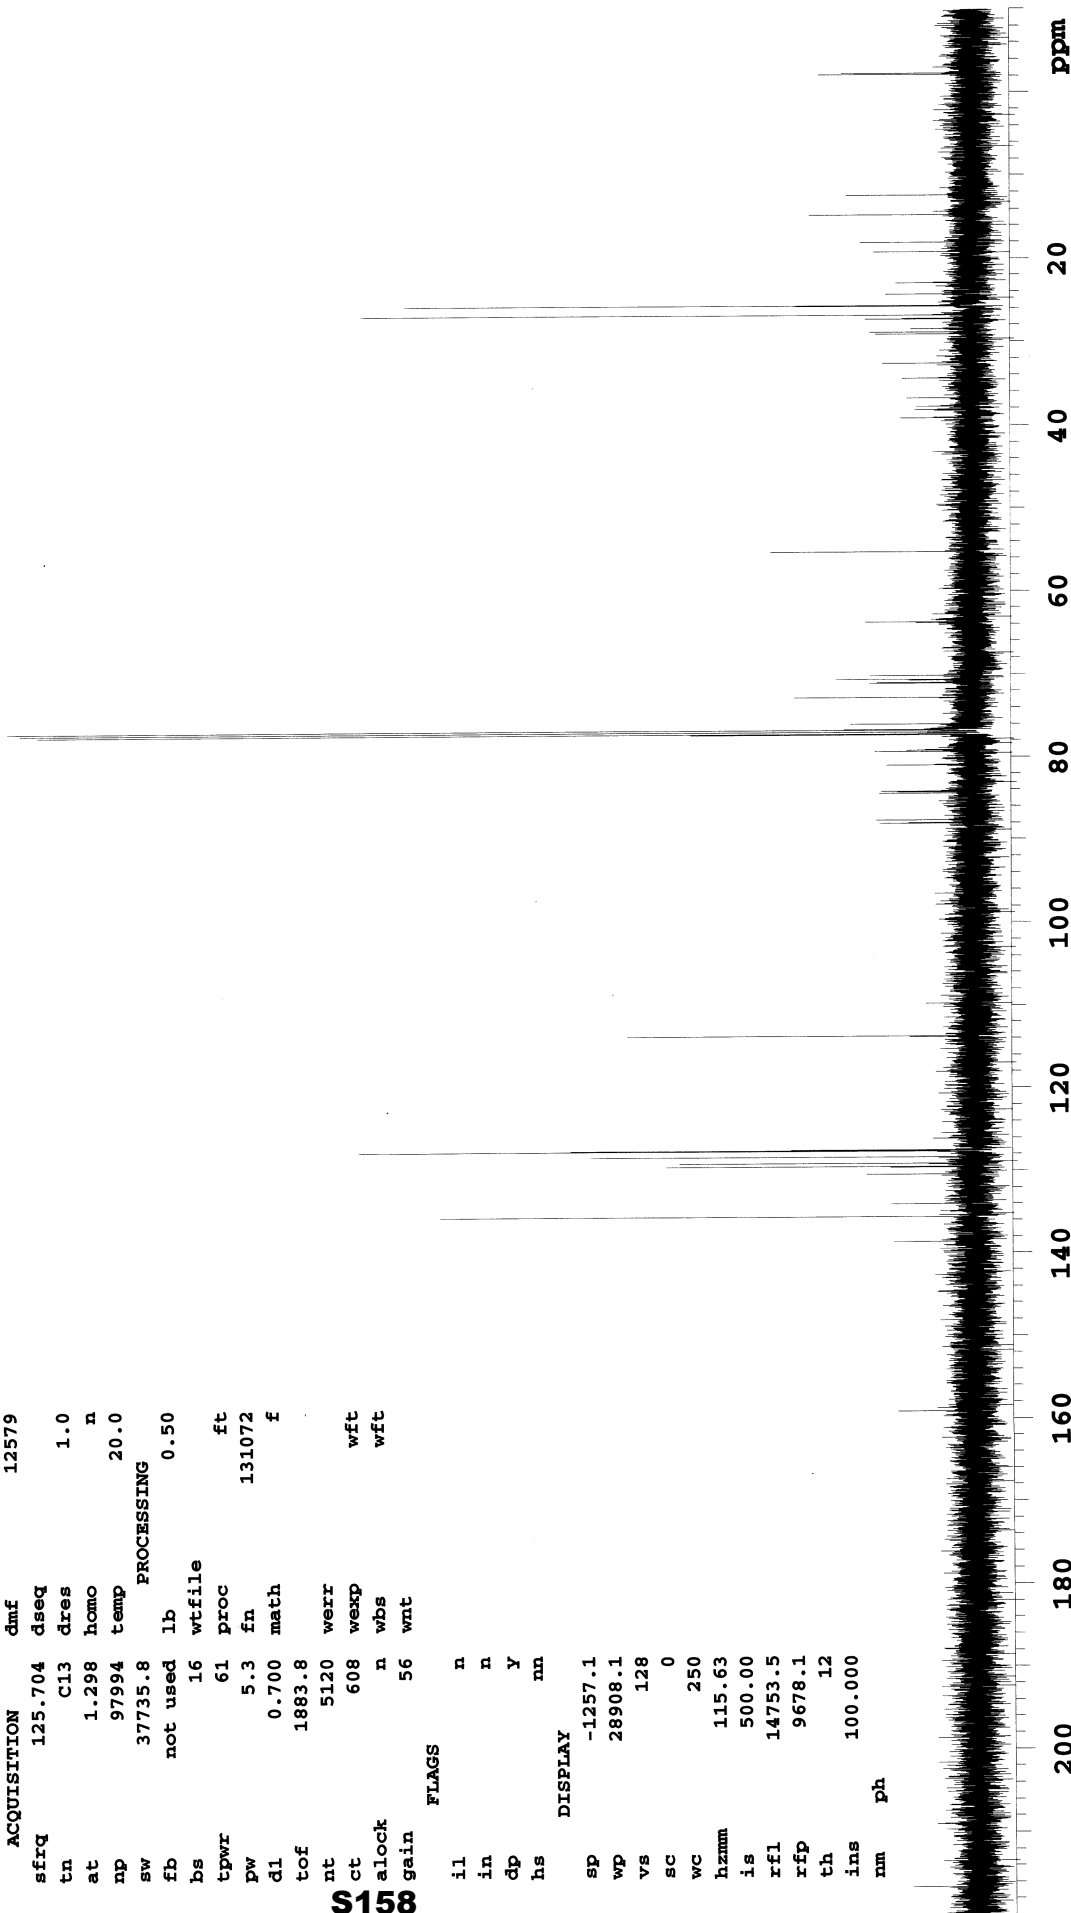

STANDARD PROTON PARAMETERS

exp1 s2pul  
 SAMPLE DEC. & VT  
 date Jun 24 2006 dfrq 499.862  
 solvent CDCl3 dn H1  
 file exp dpwr 30  
 ACQUISITION dof 0  
 sfrq 499.862 dm nnn  
 tn H1 dnm c  
 at 1.892 dmf 200  
 np 30272 dseq  
 sw 8000.0 dres 1.0  
 fb not used homo n  
 bs 4 temp 20.0  
 tpwr 54 PROCESSING  
 pw 2.5 wtfile  
 dl 1.000 proc lp  
 tof -140.0 fn not used  
 nt 64 math f  
 ct 64  
 alock n werr  
 gain not used wexp  
 FLAGS wbs wft  
 il n wnt  
 in n  
 dp y  
 hs nn  
 DISPLAY  
 sp -250.4  
 wp 4248.8  
 vs 137  
 sc 0  
 wc 250  
 hzmm 17.00  
 is 2964.34  
 rfl 5277.2  
 rfp 3619.0  
 th 7  
 ins 1.000  
 nm ph 7

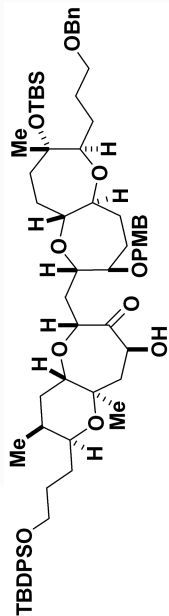

(500 MHz, CDCl<sub>3</sub>)

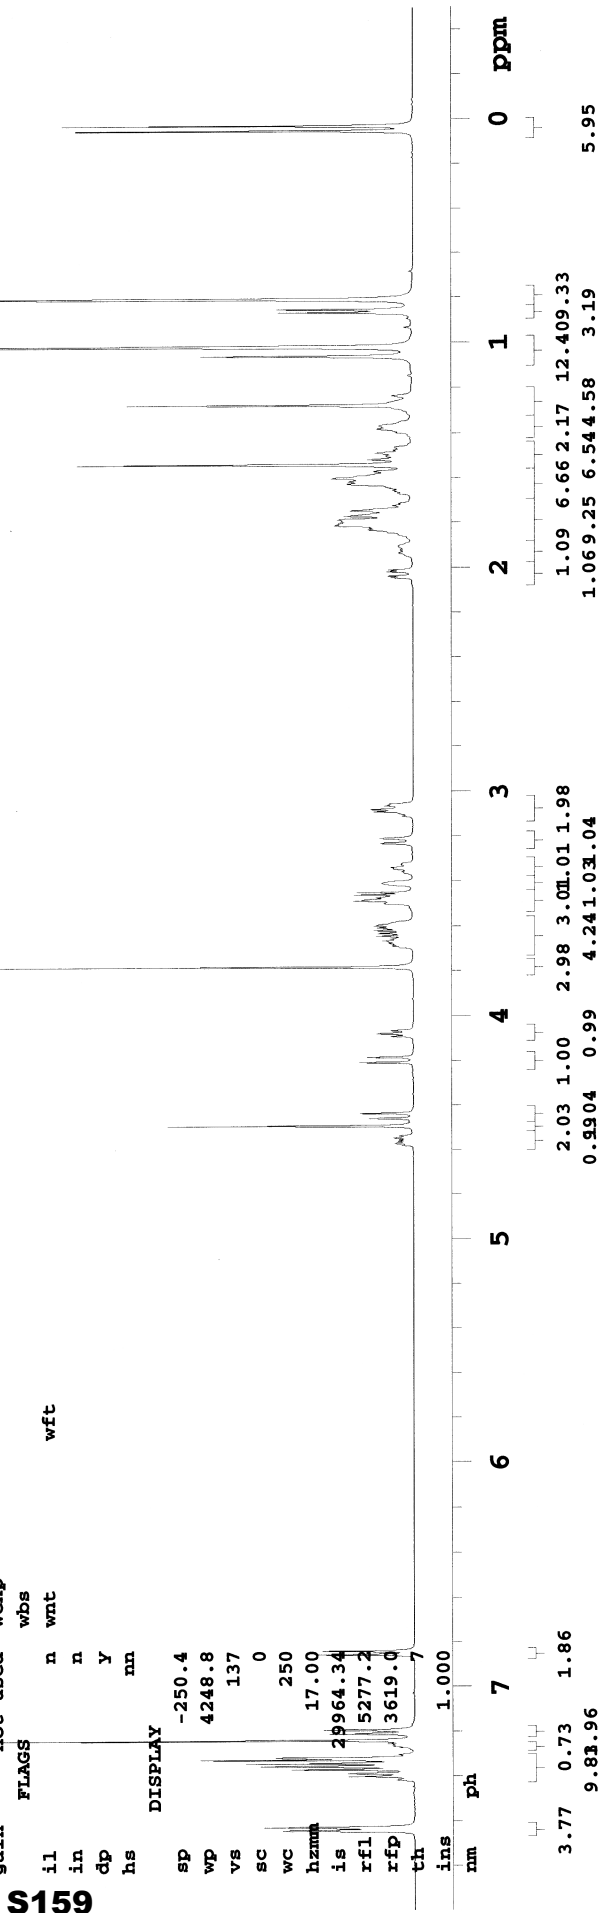

S159

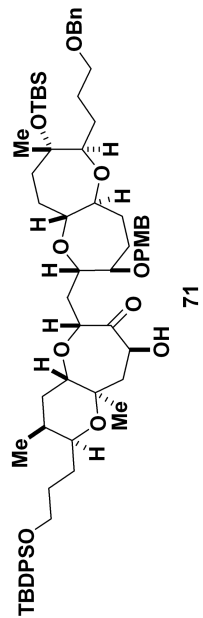

71

(125 MHz, CDCl<sub>3</sub>)

STANDARD CARBON PARAMETERS

exp3 s2pul

|                  |              |
|------------------|--------------|
| SAMPLE           | DEC. & VT    |
| date Jun 24 2006 | dfrq 499.862 |
| solvent CDC13    | dn H1        |
| file exp 27      | dpwr 0       |
| ACQUISITION      | dof 0        |
| sfrq 125.704     | dm YYY       |
| tn C13           | dmm w        |
| at 1.298         | dmf 12579    |
| np 97994         | dseq 1.0     |
| sw 37735.8       | dres n       |
| fb not used      | homo n       |
| bs 32            | temp 20.0    |
| tpwr 61          | PROCESSING   |
| pw 5.3           | lb 0.50      |
| d1 0.700         | wtfile ft    |
| tof 1883.8       | proc 131072  |
| nt 16000         | fn f         |
| ct 5120          | math         |
| alock n          | werr         |
| gain 56          | wexp wft     |
| il n             | wbs wft      |
| in n             | wnt          |
| dp y             |              |
| hs nn            |              |
| DISPLAY          |              |
| sp -1257.1       |              |
| wp 28908.1       |              |
| vs 413           |              |
| sc 0             |              |
| wc 250           |              |
| hzmm 115.63      |              |
| is 500.00        |              |
| rfl 14752.9      |              |
| rfp 9678.1       |              |
| th 130           |              |
| ins 100.000      |              |
| nm ph            |              |

S160

77.257  
77.000  
76.748

200 180 160 140 120 100 80 20 ppm

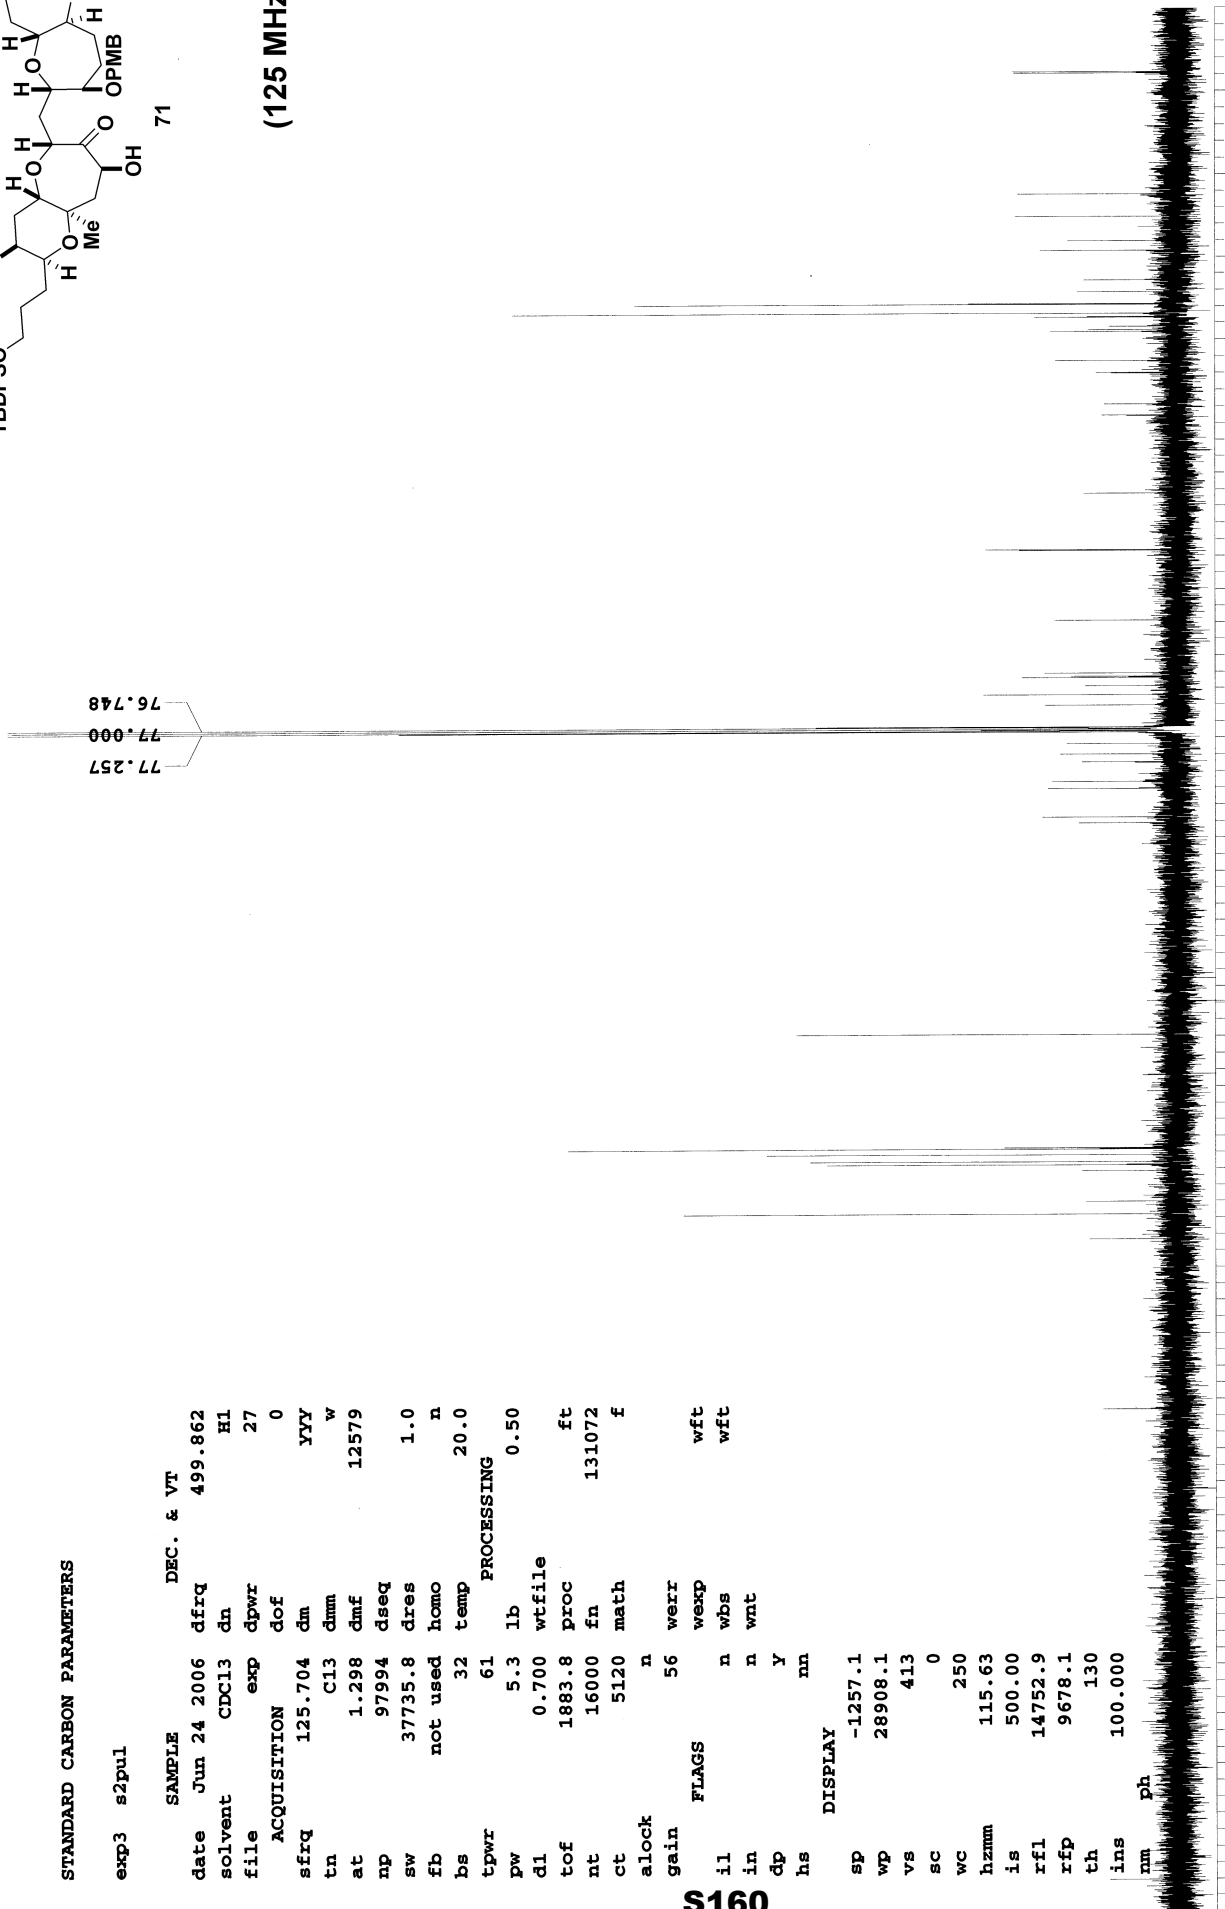

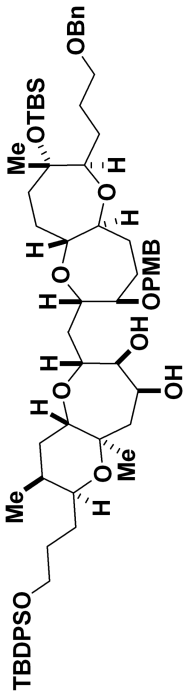

72

(500 MHz, CDCl<sub>3</sub>)

STANDARD PROTON PARAMETERS

```

exp1 s2pul
SAMPLE DEC. & VT
date Jun 25 2006 dfrq 499.862
solvent CDCl3 dn H1
file /export/home/~ dpwr 30
vnmr1/vnmrSYS/data~ dof 0
/Sasaki_lab/Ebine/~ dm nnn
ebineIII-131-H.fid dmm c
ACQUISITION dmf 200
sfrq 499.862 dseq 1.0
tn H1 dres n
at 1.892 homo n
np 30272 temp 20.0
sw 8000.0 PROCESSING
fb not used wfile
bs 4 proc lp
tpwr 54 fn not used
pw 2.5 math f
d1 1.000
tof -140.0 werr
nt 64 wexp
ct 64 wbs
alock n wnt wft
gain not used
  
```

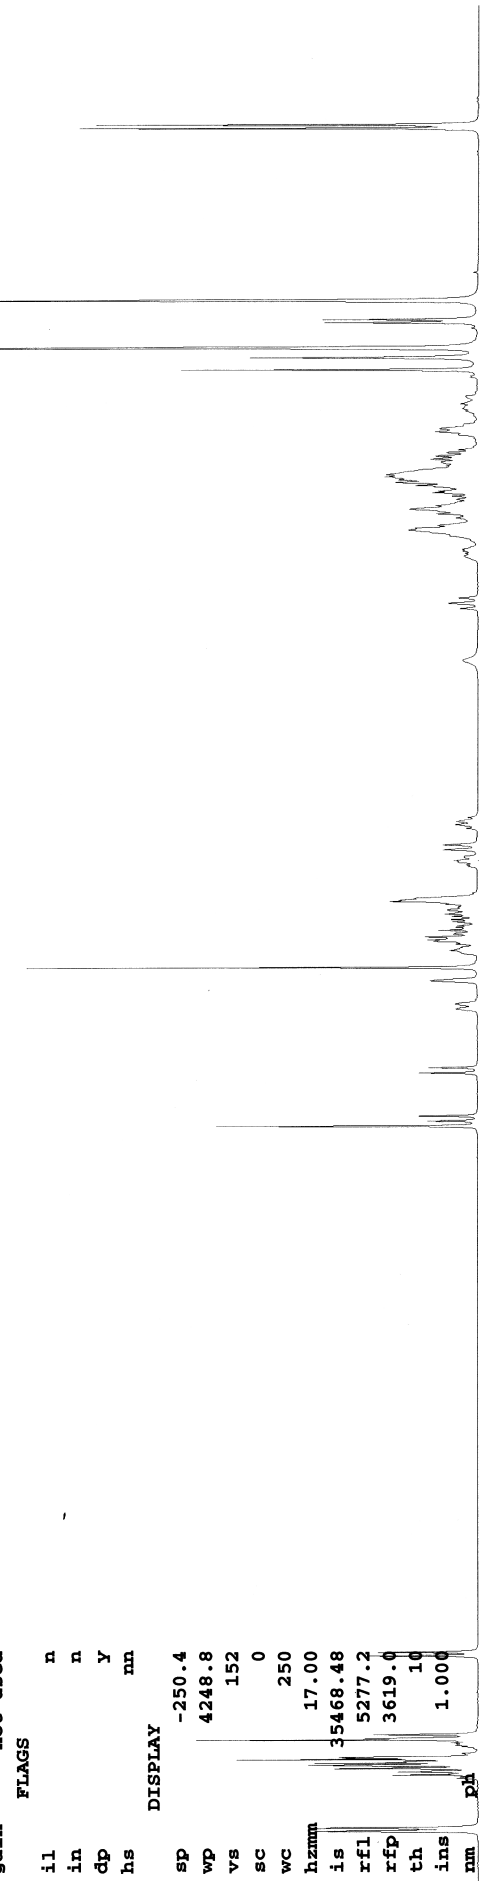

nm 7 6 5 4 3 2 1 0 ppm

S161

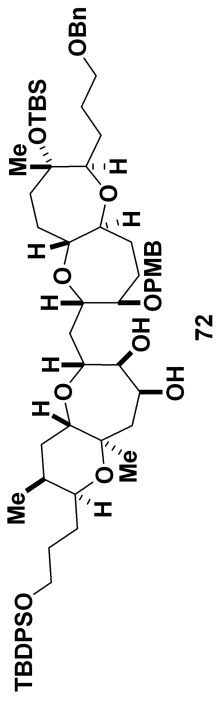

72

(125 MHz, C<sub>6</sub>D<sub>6</sub>)

STANDARD CARBON PARAMETERS

```

exp1 s2pul
SAMPLE
date Aug 7 2006 dfrq 499.862 DEC. & VT
solvent Benzene dn H1
file /export/home/~ dpwr 27
vnmr1/vnmrSYS/data/~ dof 0
/Sasaki_lab/Ebine/~ dm YYY
ebineIII-131-C-C6D6- dmm w
6.fid dmf 12579
ACQUISITION
sfrq 125.704 dseq 1.0
tn C13 homo n
at 1.298 temp 20.0
np 97994 PROCESSING
sw 37735.8 lb 0.50
fb not used wtfile
bs 16 proc ft
tpwr 61 fn 131072
pw 5.3 math f
dl 0.700
tof 1883.8 werr
nt 5120 wexp wft
ct 1280 wbs wft
alock n wnt
gain 56
DISPLAY
il n
in n
dp Y
hs nn
SP -1256.9
WP 26394.7
VS 846
SC 0
WC 250
hzmm 105.58
is 500.00
rf1 21120.2
rfp 16088.3
th 68
ins 100.000
nm ph
  
```

S162

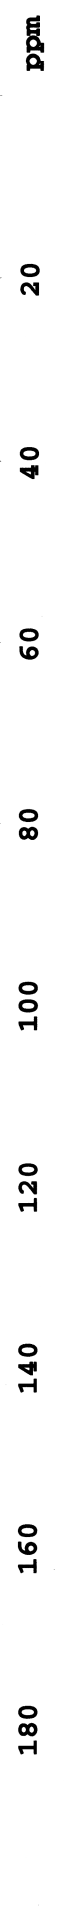

STANDARD PROTON PARAMETERS

```

exp2 s2pul
SAMPLE
date Aug 8 2006 dfrq 499.862 DEC. & VT
solvent Benzene dn H1
file exp dpwr 30 H1
ACQUISITION dof 0
sfrq 499.862 dm nnn
tn H1 dmm c
at 1.892 dmf 200
np 30272 dseq
sw 8000.0 dres 1.0
fb not used homo n
bs 4 temp 20.0
tpwr 54 PROCESSING
pw 2.5 wtfile
d1 1.000 proc lp
tof -140.0 fn not used
nt 32 math f
ct 32
alock n werr
gain not used wexp
flags n wnt wft
il in n
dp y
hs nn
DISPLAY
sp -250.0
wp 4248.8
vs 189
sc 0
wc 250
hznum 17.00
is 10547.60
rfl 5205.9
rfp 3574.0
th 7
ins 1.000
nm ph

```

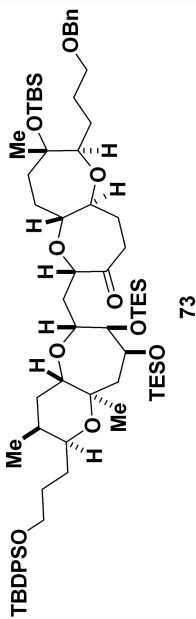

73

(500 MHz, C<sub>6</sub>D<sub>6</sub>)

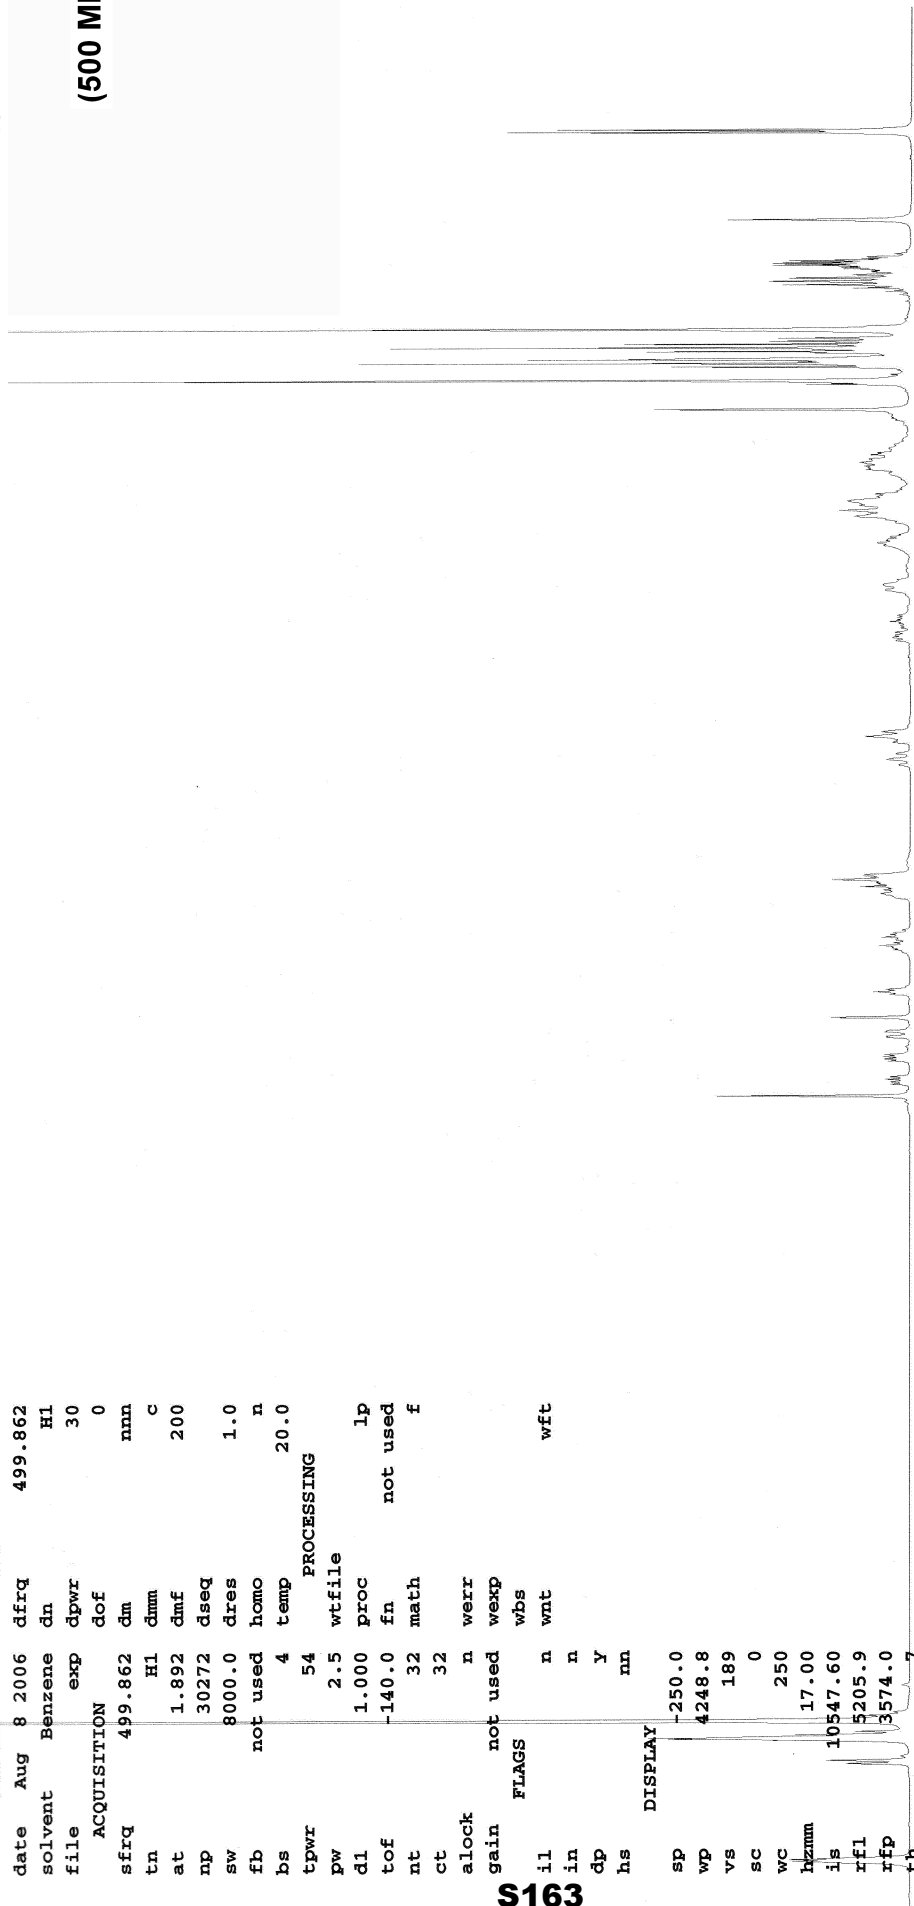

| Chemical Shift (ppm) | Integration |
|----------------------|-------------|
| 8.37                 | 1.941.07    |
| 8.24                 | 4.24        |
| 8.12                 | 1.000.99    |
| 8.04                 | 2.11.13     |
| 7.44                 | 1.02        |
| 7.44                 | 2.12        |
| 6.77                 | 1.022.04    |
| 6.77                 | 1.13        |
| 6.43                 | 4.8012.37   |
| 6.43                 | 10.410634   |
| 6.43                 | 6.77        |



STANDARD CARBON PARAMETERS

exp3 s2pul

|                 |              |
|-----------------|--------------|
| SAMPLE          | DEC. & VT    |
| date Aug 8 2006 | dfrq 499.862 |
| solvent Benzene | dn H1        |
| file exp        | dpwr 27      |
| ACQUISITION     | dof 0        |
| sfrq 125.704    | dm YYY       |
| tn C13          | dmm w        |
| at 1.298        | dmf 12579    |
| np 97994        | dseq 1.0     |
| sw 37735.8      | dres n       |
| fb not used     | homo n       |
| bs 16           | temp 20.0    |
| tpwr 61         | PROCESSING   |
| pw 5.3          | lb 0.50      |
| d1 0.700        | wtfile ft    |
| tof 1883.8      | proc 131072  |
| nt 5120         | fn f         |
| ct 1760         | math         |
| alock n         | werr         |
| gain 56         | wexp wft     |
| il n            | wbs wft      |
| in n            | wnt          |
| dp y            |              |
| hs nn           |              |

DISPLAY

|      |         |
|------|---------|
| sp   | -1256.9 |
| wp   | 28908.1 |
| vs   | 1005    |
| sc   | 0       |
| wc   | 250     |
| hzmm | 115.63  |
| is   | 125.00  |
| rfl  | 21119.6 |
| rfp  | 16088.3 |
| th   | 19      |
| ins  | 100.000 |
| nm   |         |
| ph   |         |

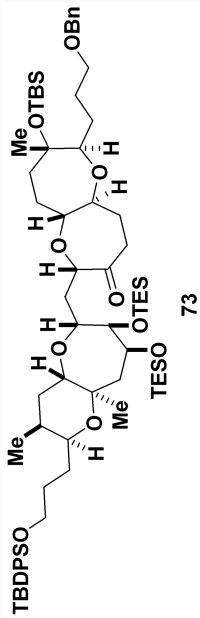

73

(125 MHz, C<sub>6</sub>D<sub>6</sub>)

S164

200 180 160 140 120 100 80 60 40 20 ppm

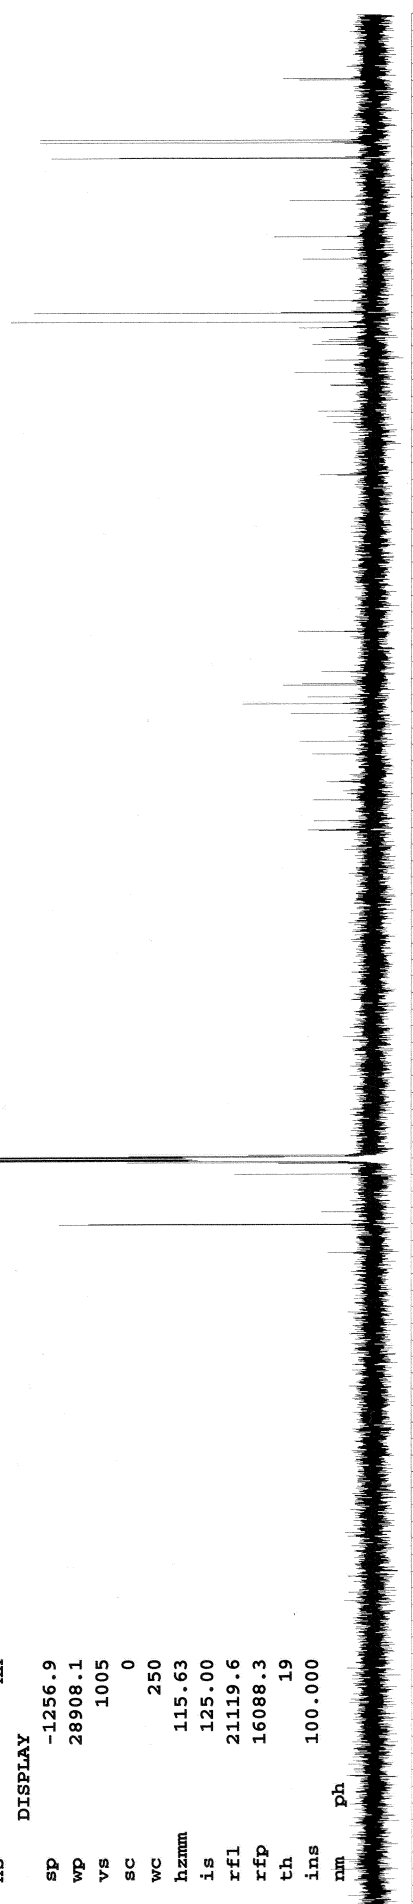

STANDARD PROTON PARAMETERS

exp3 s2pul

SAMPLE DEC. & VT  
 date Aug 7 2006 dfrq 499.862  
 solvent Benzene dn H1  
 file exp dpwr 30  
 ACQUISITION dof 0  
 sfrq 499.862 dm nnn  
 tn H1 dnm c  
 at 1.892 dmf 200  
 np 30272 dseq  
 sw 8000.0 dres 1.0  
 fb not used homo n  
 bs 4 temp 20.0  
 tpwr 54 PROCESSING  
 pw 2.5 wtfile  
 dl 1.000 proc lp  
 tof -140.0 fn not used  
 nt 16 math f  
 ct 16  
 alock n werr  
 gain not used wexp  
 FLAGS wbs  
 il n wnt wft  
 in n  
 dp y  
 hs mn  
 DISPLAY  
 sp -250.0  
 wp 4248.8  
 vs 192  
 sc 0  
 wc 250  
 hzmm 17.00  
 fs 35164.03  
 xfl 5205.9  
 rfp 3574.0  
 ch 7

74

(500 MHz, C<sub>6</sub>D<sub>6</sub>)

Acetyl  
 Oxide

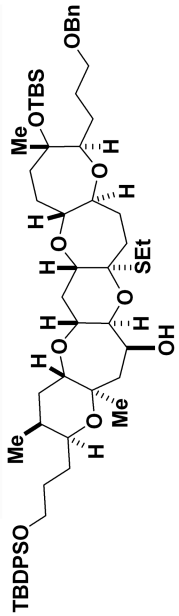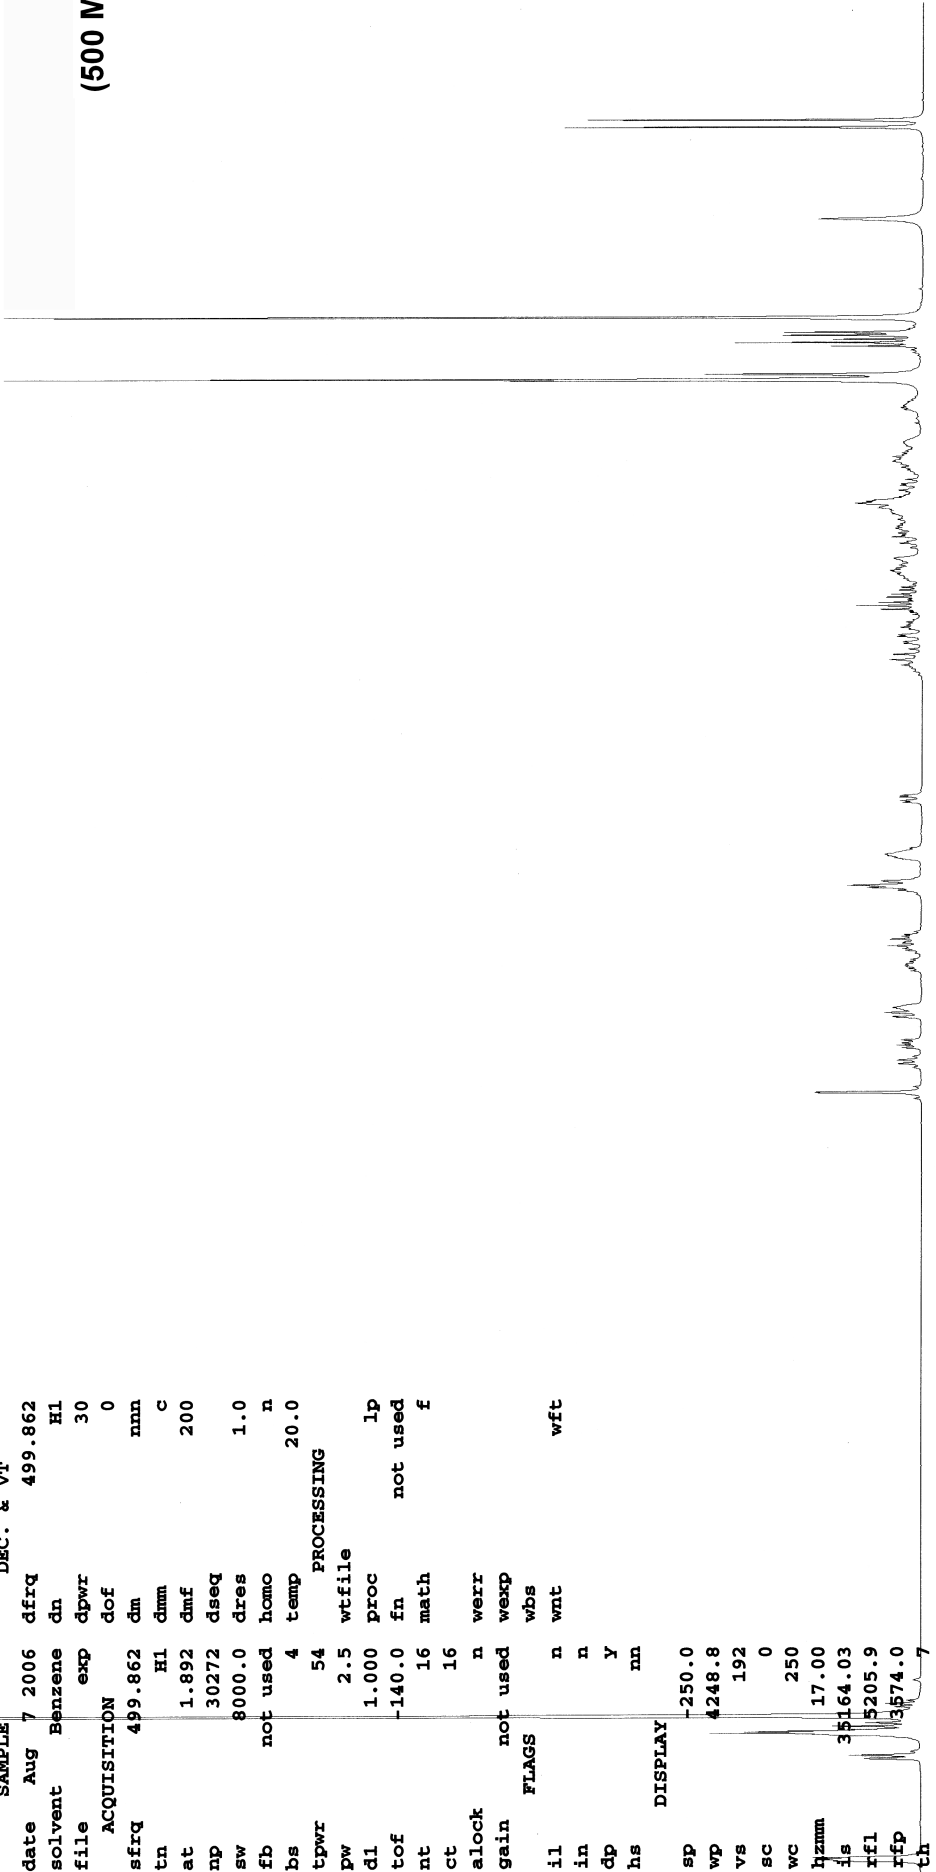

S165

STANDARD CARBON PARAMETERS

exp4 s2pul

|                 |              |
|-----------------|--------------|
| SAMPLE          | DEC. & VT    |
| date Aug 7 2006 | dfrq 499.862 |
| solvent Benzene | dn H1        |
| file exp        | dpwr 27      |
| ACQUISITION     | dof 0        |
| sfrq 125.704    | dm YYY       |
| tn C13          | dmm w        |
| at 1.298        | dmf 12579    |
| np 97994        | dseq         |
| sw 37735.8      | dres 1.0     |
| fb not used     | homo n       |
| bs 16           | temp 20.0    |
| tpwr 61         | PROCESSING   |
| pw 5.3          | lb 0.50      |
| d1 0.700        | wtfile       |
| tof 1883.8      | proc ft      |
| nt 5120         | fn 131072    |
| ct 2048         | math f       |
| alock n         |              |
| gain 56         | werr         |
| il n            | wexp wft     |
| in n            | wbs wft      |
| dp y            | wnt          |
| hs nn           |              |
| DISPLAY         |              |
| sp -1256.9      |              |
| wp 26394.7      |              |
| vs 843          |              |
| sc 0            |              |
| wc 250          |              |
| hzmm 105.58     |              |
| is 250.00       |              |
| rfl 21120.2     |              |
| rfp 16088.3     |              |
| th 61           |              |
| ins 100.000     |              |
| nm ph           |              |

128.192  
129.000  
127.803

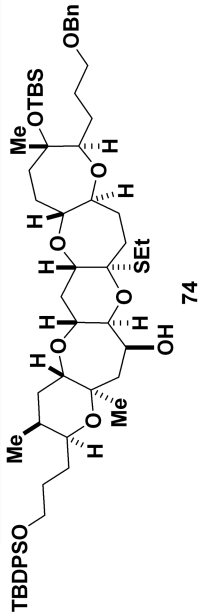

(125 MHz, C<sub>6</sub>D<sub>6</sub>)

S166

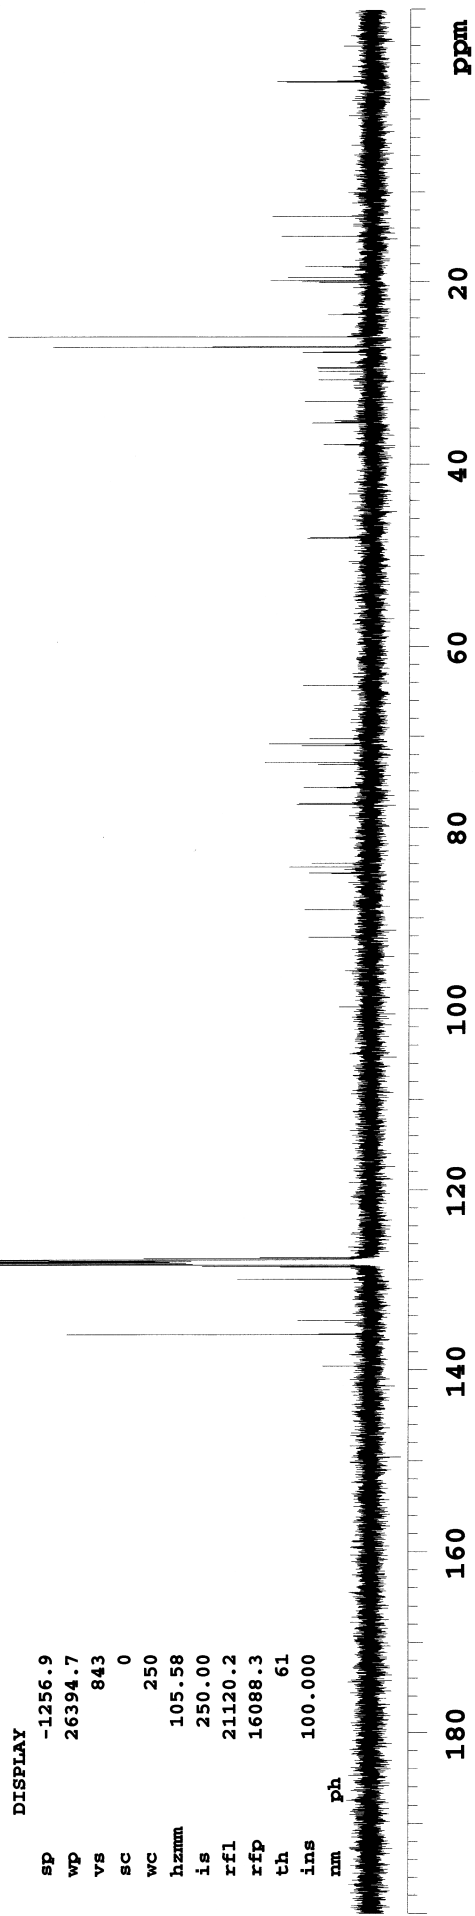

STANDARD PROTON PARAMETERS

exp1 s2pul  
 SAMPLE DEC. & VT  
 date Aug 7 2006 dfrq 499.862  
 solvent Benzene dn H1  
 file exp dpwr 30  
 ACQUISITION dof 0  
 sfrq 499.862 dm nnn  
 tn H1 dnm c  
 at 1.892 dmf 200  
 np 30272 dseq 1.0  
 sw 8000.0 dres n  
 fb not used homo n  
 bs 4 temp 20.0  
 tpwr 54 PROCESSING  
 pw 2.5 wtfile  
 d1 1.000 proc lp  
 tof -140.0 fn not used  
 nt 32 math f  
 ct 32  
 alock n werr  
 gain not used wexp  
 FLAGS wbs  
 il n wnt  
 in n  
 dp y  
 hs nn

DISPLAY  
 sp -250.0  
 wp 4248.8  
 vs 184  
 sc 0  
 wc 250  
 Hzmm 17.00  
 is 59827.96  
 xfl 5205.9  
 xfp 3574.0  
 th 7

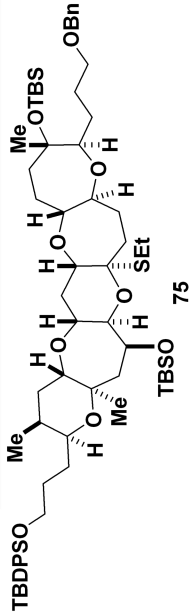

(500 MHz, C<sub>6</sub>D<sub>6</sub>)

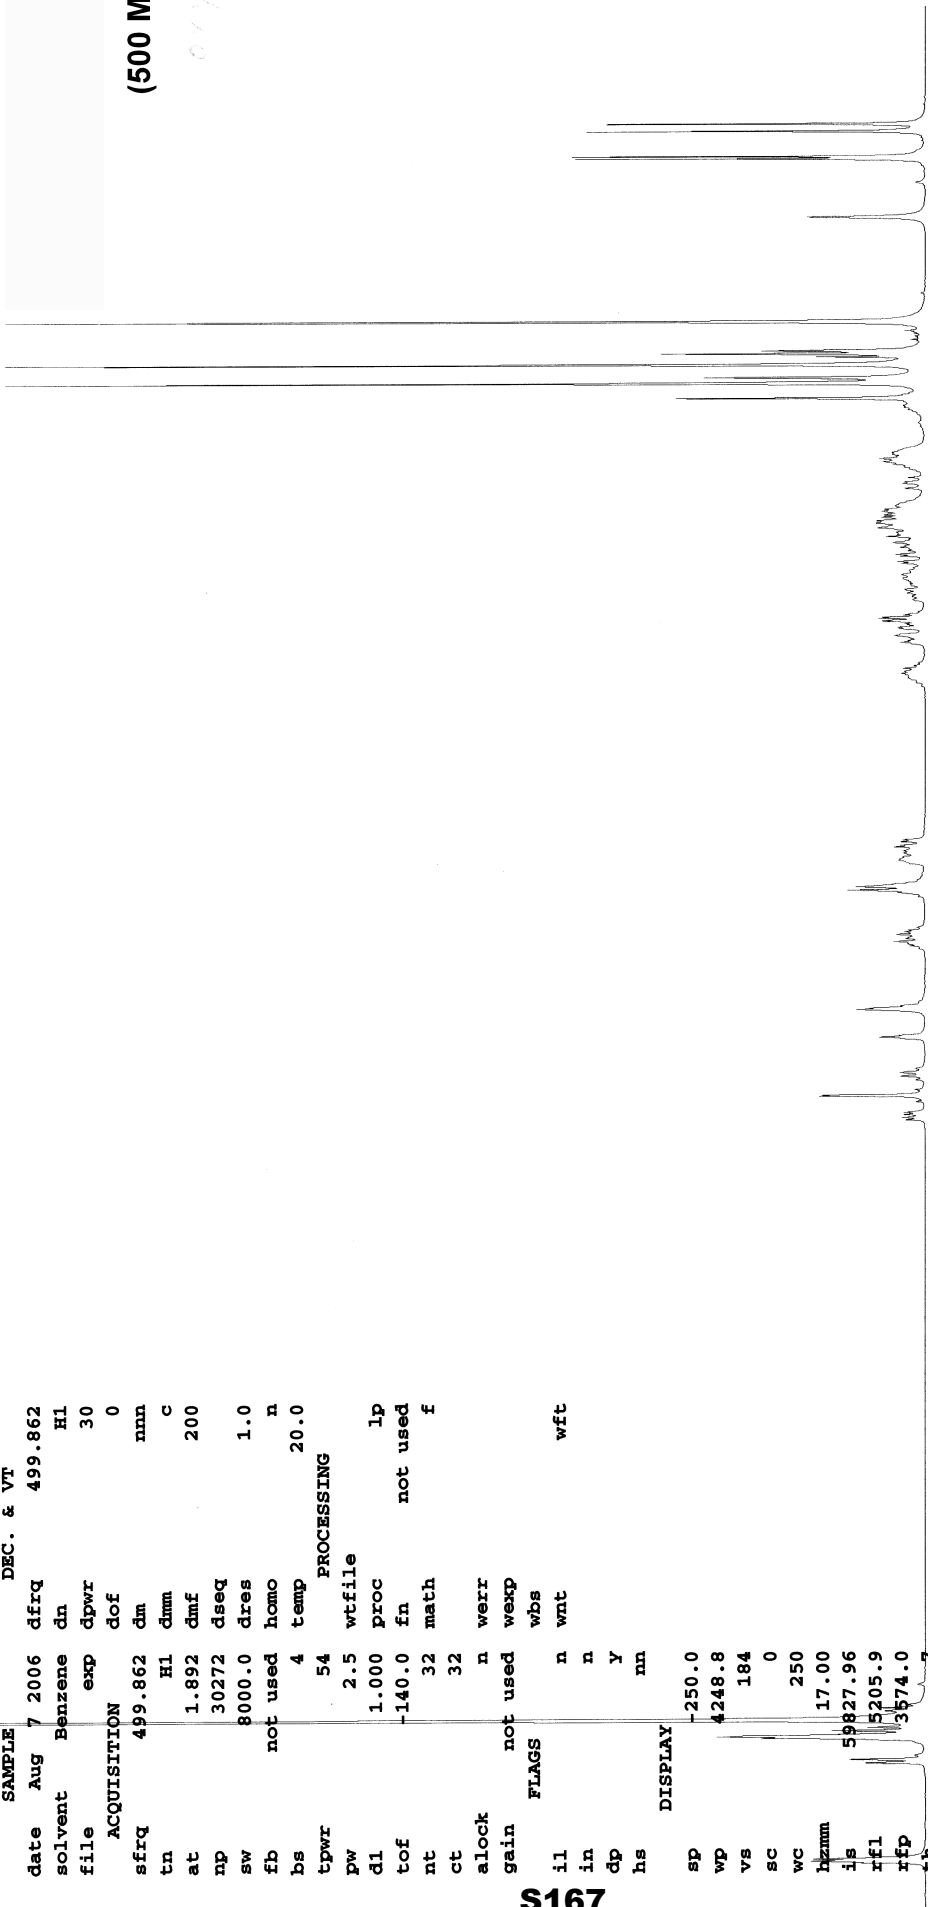

| Chemical Shift (ppm) | Integration |
|----------------------|-------------|
| 3.78                 | 1.9071      |
| 5.77                 | 5.7785      |
| 1.00                 | 1.00        |
| 1.01                 | 2.01        |
| 1.93                 | 3.11        |
| 3.07                 | 3.07        |
| 1.18                 | 1.18        |
| 1.15                 | 1.15        |
| 1.22                 | 1.22        |
| 1.42                 | 1.42        |
| 1.19                 | 1.19        |
| 1.11                 | 1.11        |
| 4.76                 | 4.76        |
| 1.19                 | 1.19        |
| 1.11                 | 1.11        |
| 12.08                | 12.08       |
| 12.83                | 12.83       |
| 4.25                 | 4.25        |
| 5.52                 | 5.52        |
| 5.94                 | 5.94        |

STANDARD CARBON PARAMETERS

exp2 s2pul

SAMPLE DEC. & VT  
 date Aug 7 2006 dfrq 499.862  
 solvent Benzene dn H1  
 file exp 27  
 ACQUISITION dof 0  
 sfrq 125.704 dm YYY w  
 tn C13 dnm 12579  
 at 1.298 dmf  
 np 97994 dseq  
 sw 37735.8 dres 1.0  
 fb not used homo n  
 bs 16 temp 20.0  
 tpwr 61 PROCESSING  
 pw 5.3 lb 0.50  
 d1 0.700 wtfile  
 tof 1883.8 proc ft  
 nt 5120 fn 131072  
 ct 1760 math f  
 alock n  
 gain 56 werr  
 FLAGS wft  
 il n wbs wft  
 in n wnt  
 dp y  
 hs nn

DISPLAY  
 sp -1256.9  
 wp 26394.7  
 vs 914  
 sc 0  
 wc 250  
 hzmm 105.58  
 is 500.00  
 rfl 21120.2  
 rfp 16088.3  
 th 17  
 ins 100.000  
 nm ph

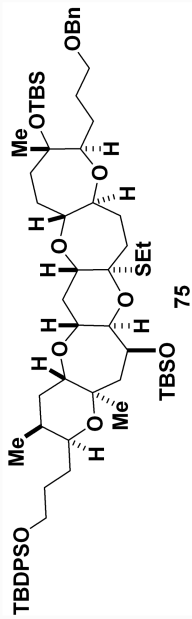

(125 MHz, C<sub>6</sub>D<sub>6</sub>)

S168

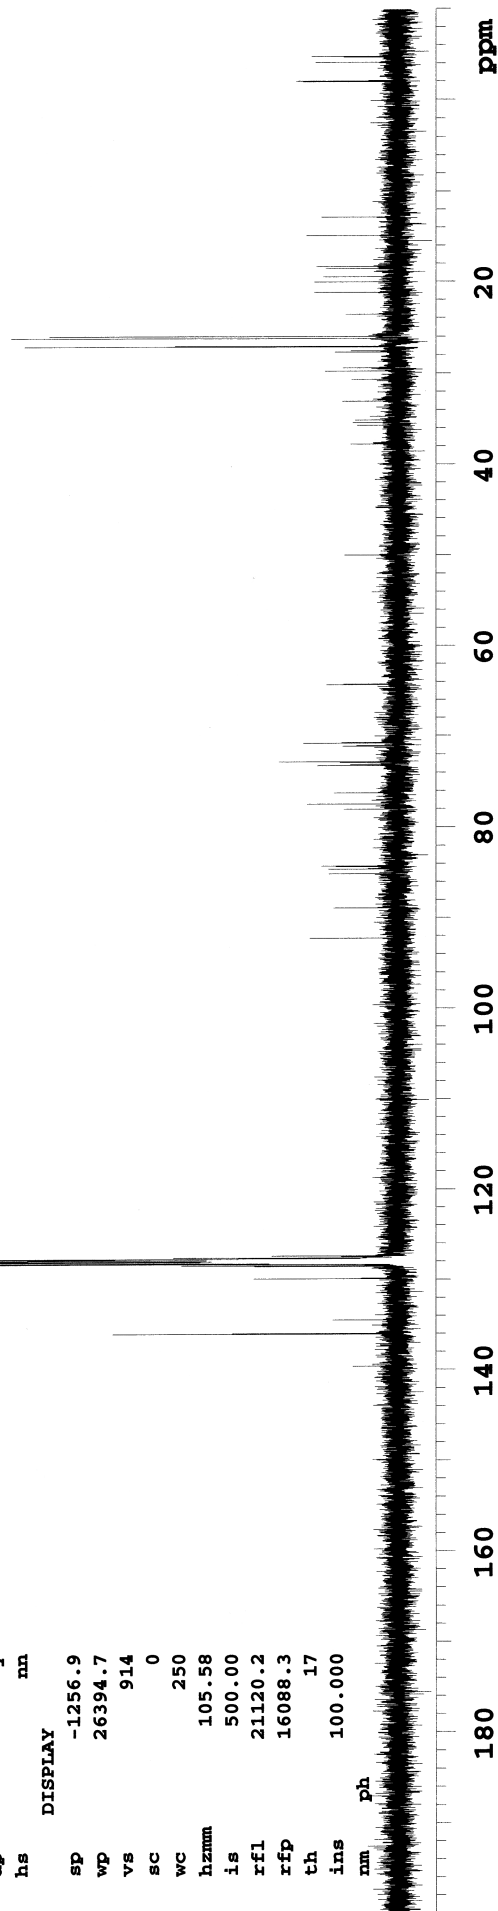

STANDARD PROTON PARAMETERS

```

exp1 s2pul
SAMPLE
date Mar 19 2005
solvent Benzene
file ACQUISITION
sfrq 499.862
th H1
at 1.892
np 30272
sw 8000.0
fb not used
bs 4
tpwr 54
pw 2.6
d1 1.000
tof -140.0
nt 128
ct 128
alock n
gain not used
il n
in n
dp y
hs nn
SP -250.0
wp 4248.8
vs 167
sc 0
wc 250
hzm 17.00
ls 33.57
rf1 5205.9
rfp 3574.0
th 1.000
nm ph
DEC. & VT
dfrq 499.862
dn H1
dpwr 30
dof 0
dm nnn
dmm C
dmf 200
dseq 1.0
dres n
homo n
temp 20.0
wtfile
proc lp
fn not used
math f
werr
wexp wft
wbs wft
wnt wft

```

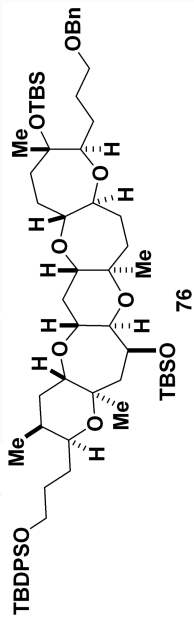

(500 MHz, C<sub>6</sub>D<sub>6</sub>)

Acid  
oxyl

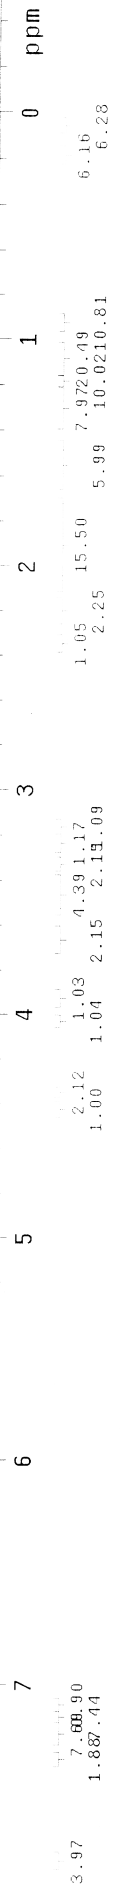

III-106 ebine 9437 kouzou 05/3/19  
 Pulse Sequence: s2pu1  
 Solvent: Benzene  
 Temp. 20.0 C / 293.1 K  
 User: 1-14-87  
 INOVA-600 "inova600"

Relax. delay 0.800 sec  
 Pulse 45.0 degrees  
 Acq. time 0.867 sec  
 Width 34632.0 Hz  
 36864 repetitions  
 OBSERVE C13, 150.8482663 MHz  
 DECOUPLE H1, 599.9153002 MHz  
 Power 39 dB  
 continuously on  
 WALTZ-16 modulated  
 DATA PROCESSING  
 Line broadening 0.5 Hz  
 Gauss apodization 0.388 sec  
 FT size 131072  
 Total time 23 hr, 16 min, 20 sec

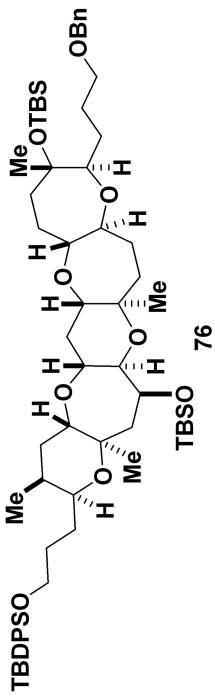

(

(125 MHz, C<sub>6</sub>D<sub>6</sub>)

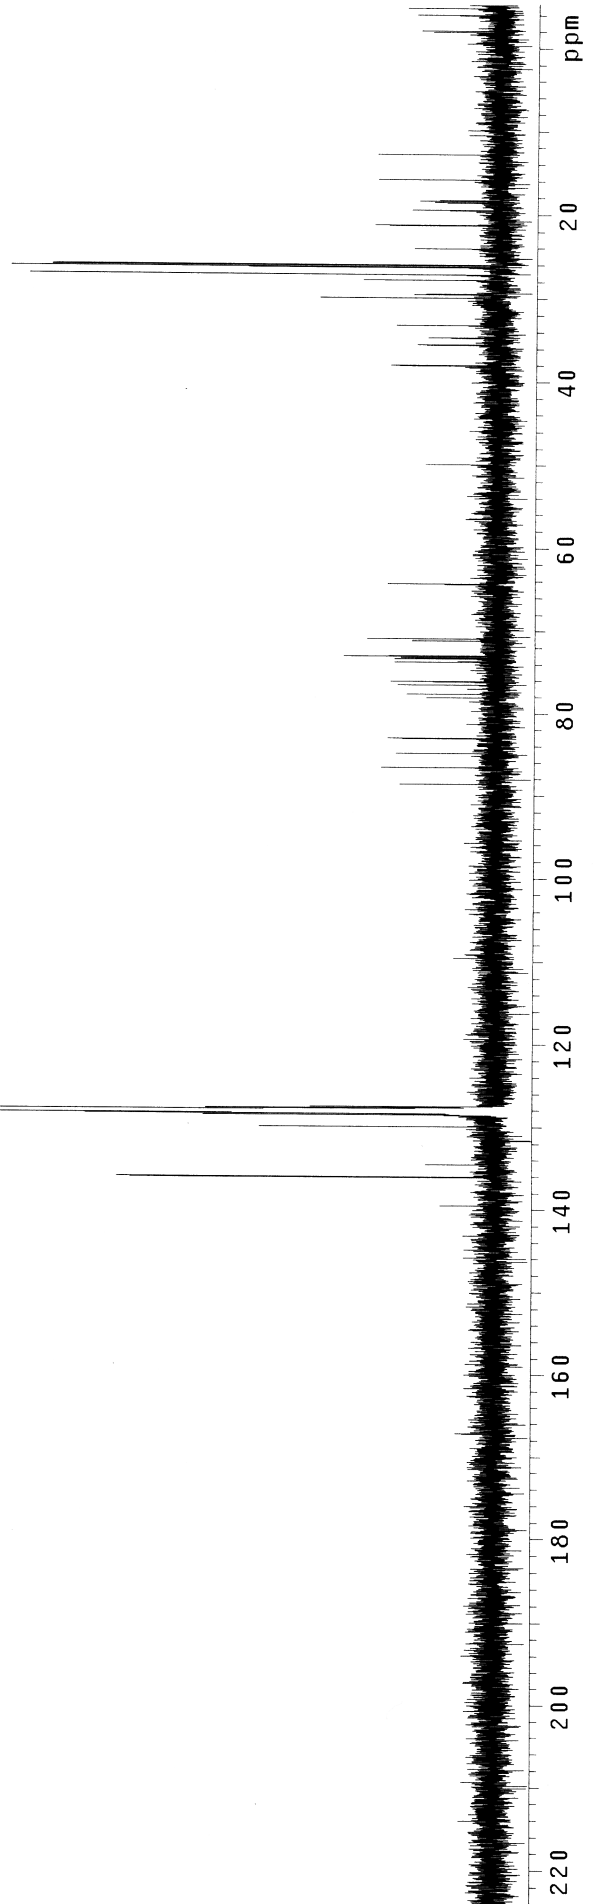

STANDARD PROTON PARAMETERS

exp1 s2pul

SAMPLE DEC. & VT  
 date Apr 14 2006 dfrq 499.862  
 solvent Benzene dn H1  
 file exp 30  
 ACQUISITION dof 0  
 sfrq 499.862 dm nnn  
 tn H1 dnm c  
 at 1.892 dmf 200  
 np 30272 dseq  
 sw 8000.0 dres 1.0  
 fb not used homo n  
 bs 4 temp 20.0  
 tpwr 54 PROCESSING  
 pw 2.6 wtfile  
 d1 1.000 proc lp  
 tof -140.0 fn not used f  
 nt 64 math  
 ct 64  
 alock n werr  
 gain not used wexp  
 FLAGS n wnt wft  
 il n  
 in n  
 dp y  
 hs nn  
 DISPLAY  
 sp -250.0  
 wp 4248.8  
 vs 148  
 sc 0  
 wc 250  
 Hzmm 17.00  
 is 40156.20  
 rfl 5205.9  
 rfp 3574.0  
 th 7  
 ins 1.000  
 nm ph

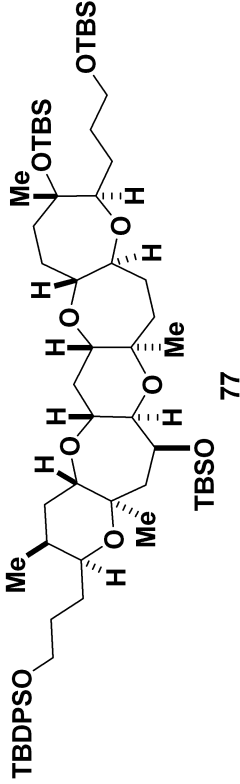

(500 MHz, C<sub>6</sub>D<sub>6</sub>)

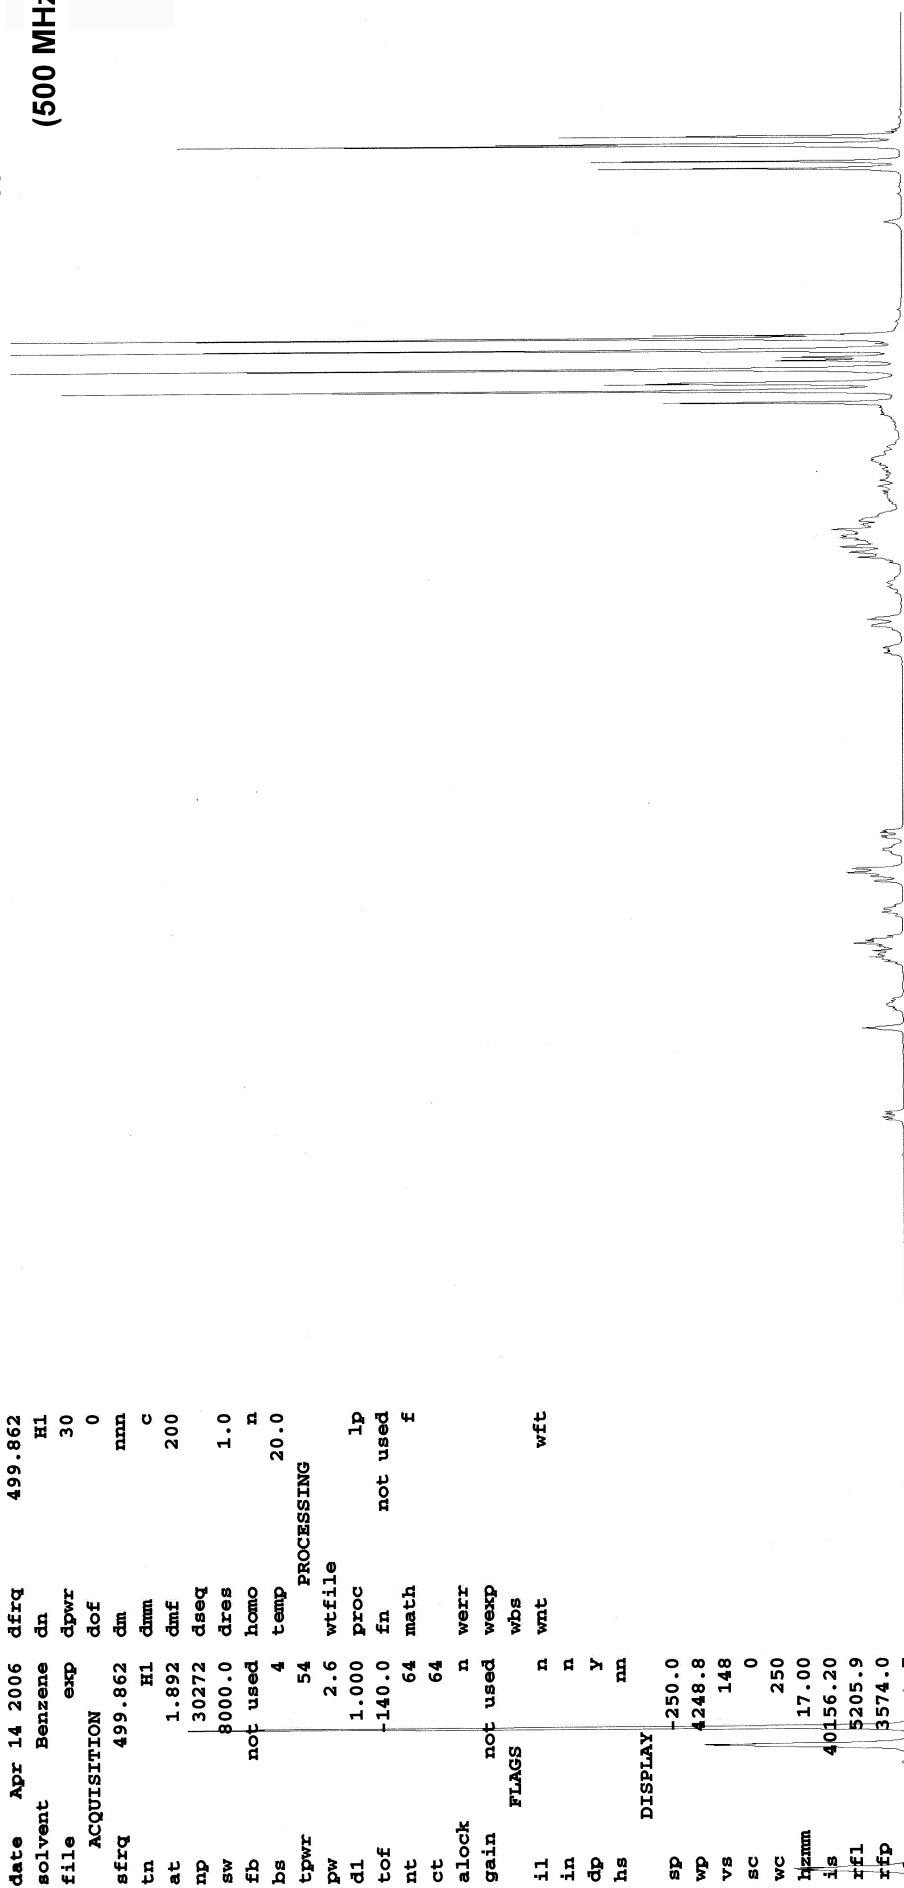

| Chemical Shift (ppm) | Integration  |
|----------------------|--------------|
| 3.65                 | 0.97         |
| 5.38                 | 0.96         |
| 1.04                 | 1.04         |
| 1.00                 | 1.00         |
| 3.090.98             | 3.090.98     |
| 1.17                 | 1.02         |
| 12.10                | 2.02         |
| 6.60                 | 6.60         |
| 3.528.913.22         | 3.528.913.22 |
| 2.8843               | 2.8843       |
| 2.3886               | 2.3886       |



**STANDARD CARBON PARAMETERS**

Pulse Sequence: s2pul

Solvent: Benzene

Temp. 20.0 C / 293.1 K

User: 1-14-87

INOVA-500 "varian"

Relax. delay 0.700 sec

Pulse 45.0 degrees

Acq. time 1.298 sec

Width 37735.8 Hz

256 repetitions

OBSERVE C13, 125.6896916 MHz

DECOUPLE H1, 499.8618491 MHz

Power 27 dB

continuously on

WALTZ-16 modulated

DATA PROCESSING

Line broadening 0.5 Hz

FT size 131072

Total time 2 hr, 51 min, 19 sec

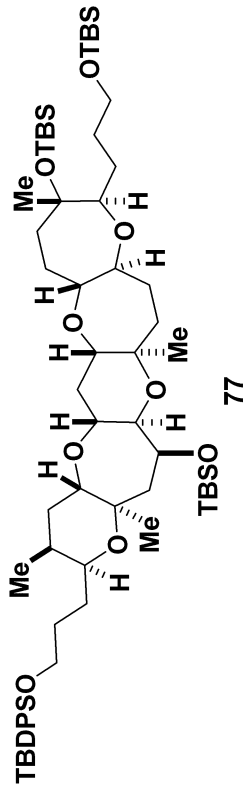

(125 MHz, C<sub>6</sub>D<sub>6</sub>)

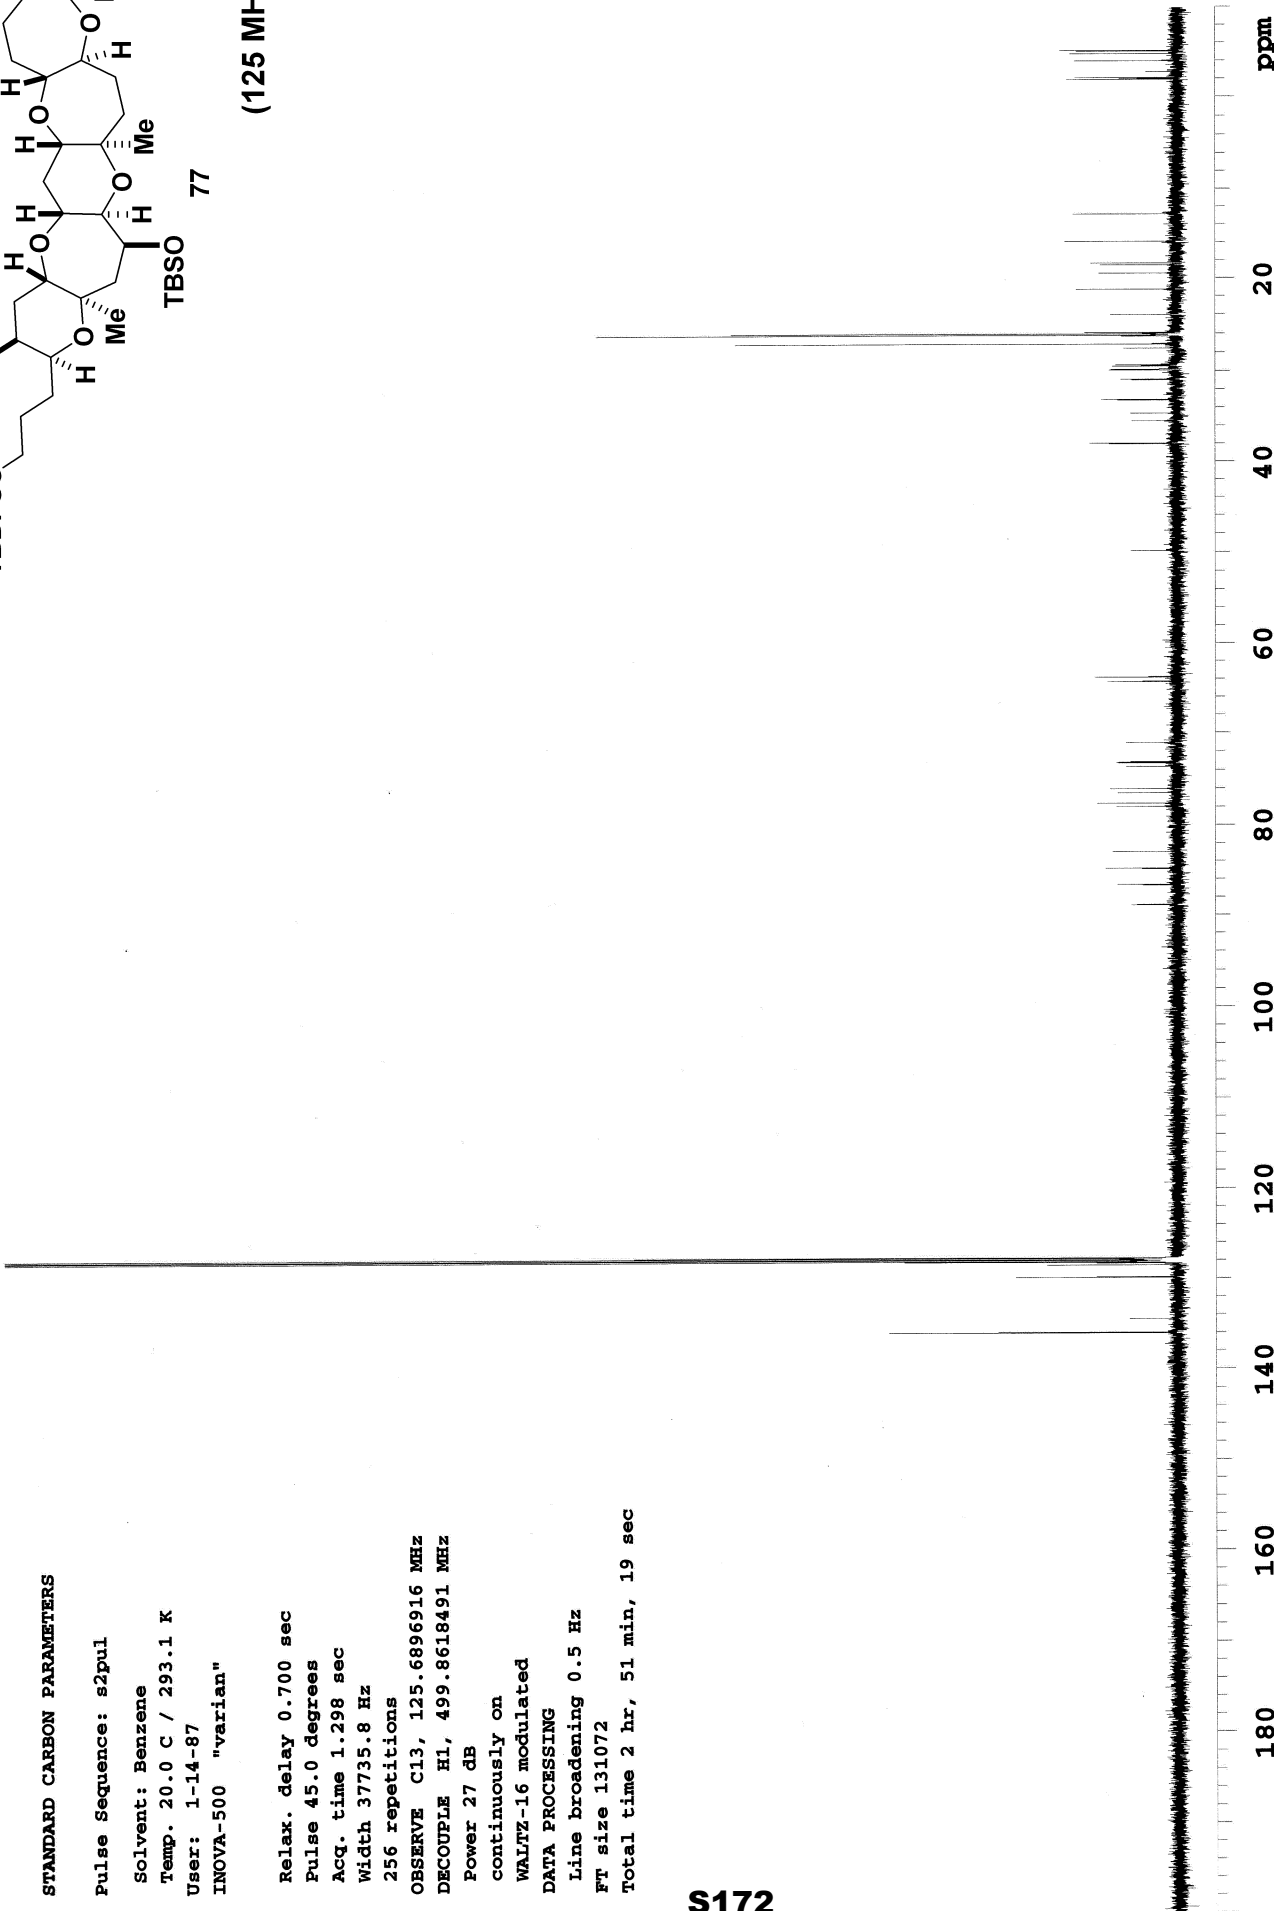

S172

STANDARD PROTON PARAMETERS

```

exp1 s2pul
SAMPLE
date Apr 19 2006 dfrq 499.862
solvent Benzene d1 H1
file exp 30
ACQUISITION
sfrq 499.862 dm nnn
tn H1 dnm c
at 1.892 dmf 200
np 30272 dseq 1.0
sw 8000.0 dres n
fb not used homo n
bs 4 temp 20.0
tpwr 54 PROCESSING
pw 2.5 wtfile
d1 1.000 proc lp
tof -140.0 fn not used
nt 16 math f
ct 16
alock n werr
gain not used wexp
FLAGS il n n wft
in n n
dp y
hs nn
DISPLAY
sp -250.0
wp 4248.8
vs 162
sc 0
wc 250
hzmm 17.00
is 20336.58
xfl 5203.4
xfp 3574.0
ch 7
ins 1.000
nm ph

```

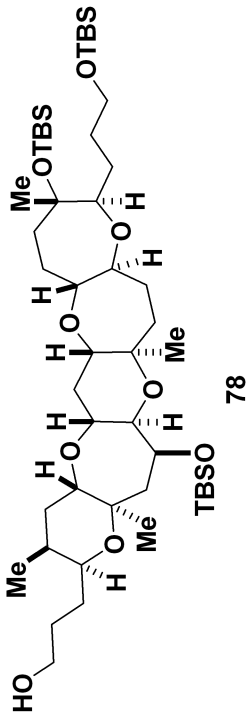

78

(500 MHz, C<sub>6</sub>D<sub>6</sub>)

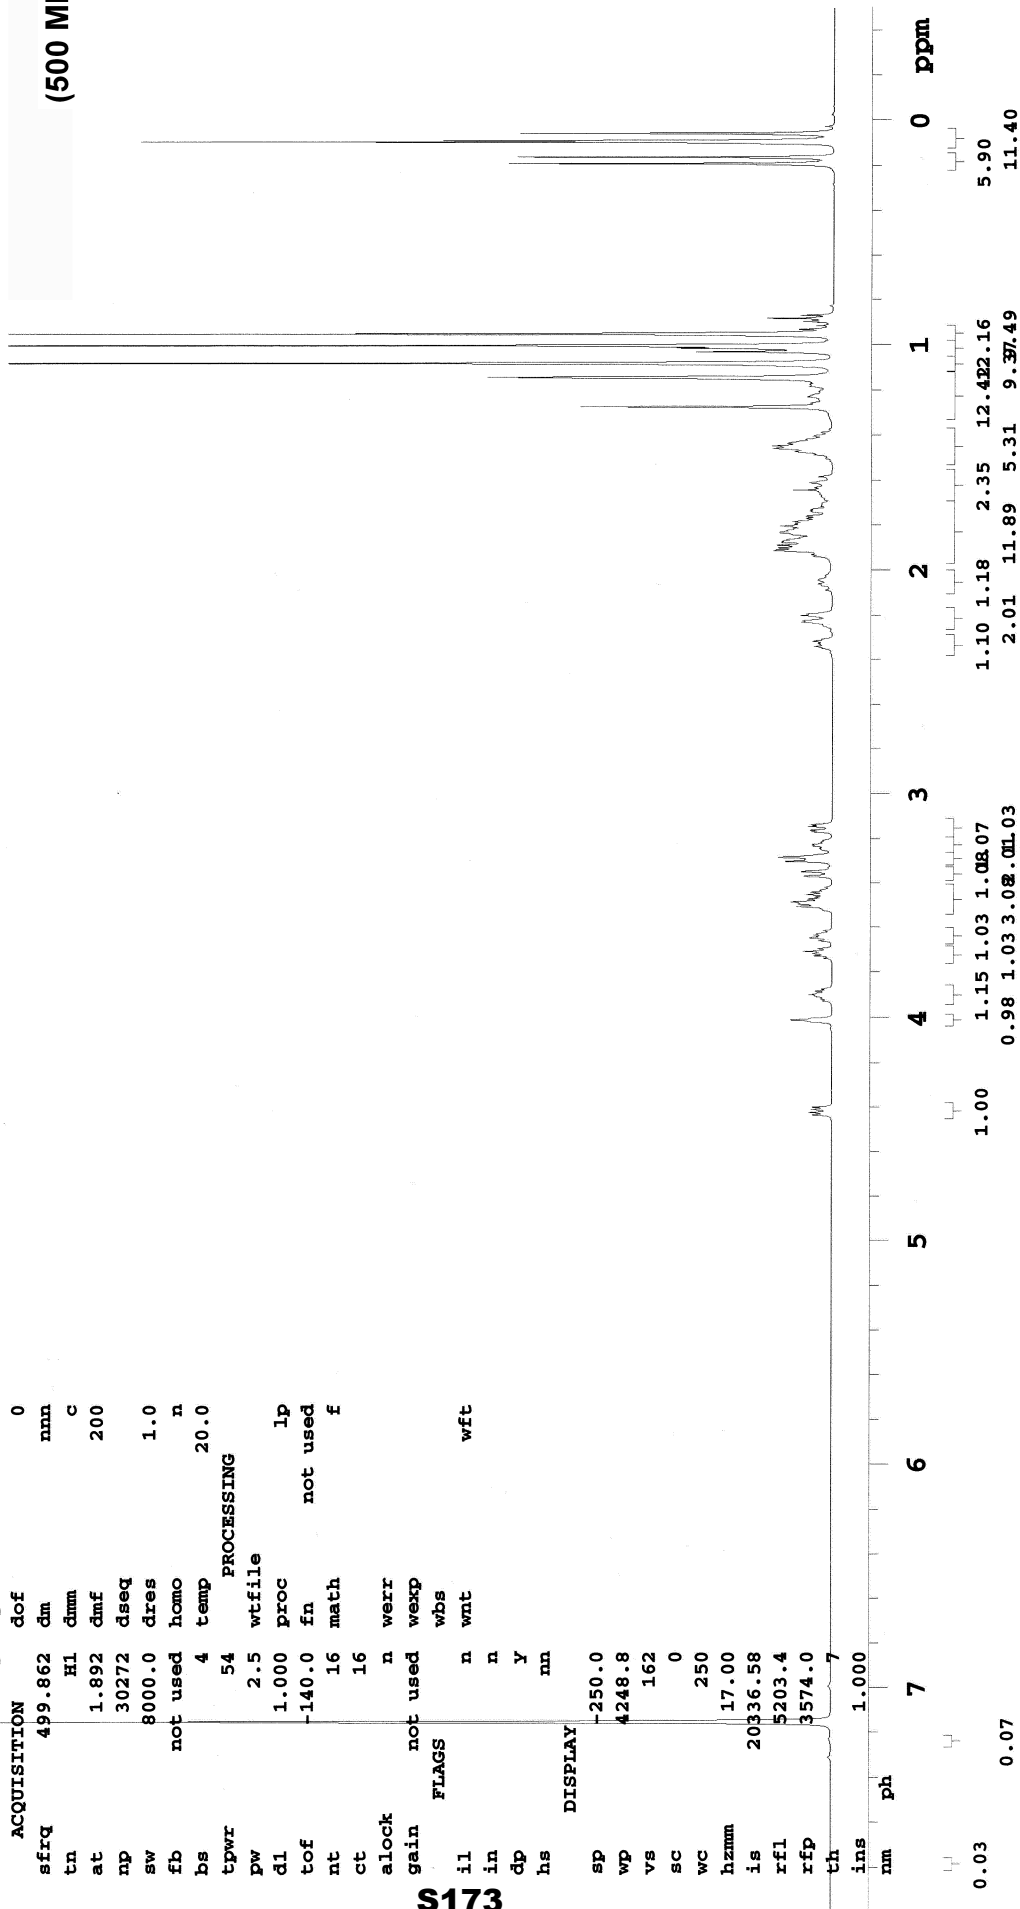

S173

STANDARD CARBON PARAMETERS

```

exp3 s2pul
SAMPLE
date Apr 19 2006 dfrq 499.862
solvent Benzene dn H1
file exp dpwr 27
ACQUISITION dof 0
sfrq 125.704 dm YYY
tn C13 dmm w
at 1.298 dmf 12579
np 97994 dseq
sw 37735.8 dres 1.0
fb not used homo n
bs 32 temp 20.0
tpwr 61 PROCESSING
pw 5.3 lb 0.50
d1 0.700 wfile
tof 1883.8 proc ft
nt 5120 fn 131072
ct 576 math f
alock n
gain 56 werr
FLAGS wexp wft
il n wbs wft
in n wnt
dp y
hs nn
DISPLAY
sp -1256.9
wp 26394.7
vs 405
sc 0
wc 250
hzmm 105.58
is 500.00
rfl 21119.6
rfp 16088.3
th 21
ins 100.000
nm ph
  
```

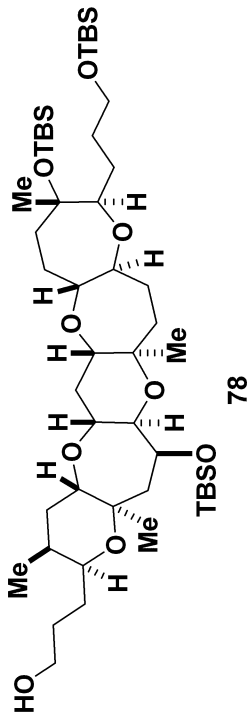

78

(125 MHz, C<sub>6</sub>D<sub>6</sub>)

S174

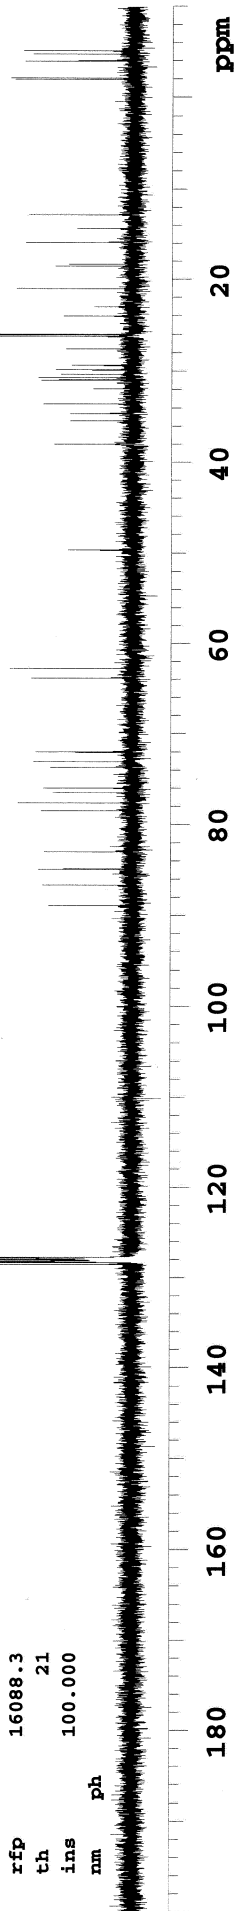

STANDARD PROTON PARAMETERS

exp1 s2pul

SAMPLE DEC. & VT  
 date Apr 21 2006 dfrq 499.862  
 solvent Benzene dn H1  
 file exp dpwr 30  
 ACQUISITION dof 0  
 sfrq 499.862 dm nnn  
 tn H1 dmm c  
 at 1.892 dmf 200  
 np 30272 dseq  
 sw 8000.0 dres 1.0  
 fb not used homo n  
 bs 4 temp 20.0  
 tpwr 54 PROCESSING  
 pw 2.5 wtfile  
 dl 1.000 proc lp  
 tof -140.0 fn not used  
 nt 64 math f  
 ct 64  
 alock n werr  
 gain not used wexp  
 FLAGS wbs wnt wft  
 il n  
 in n  
 dp Y  
 hs nn  
 DISPLAY  
 sp -250.0  
 wp 4248.8  
 vs 139  
 sc 0  
 wc 250  
 hzmm 17.00  
 is 26265.24  
 rfl 5205.4  
 rfp 3574.0  
 th 7

(500 MHz, C<sub>6</sub>D<sub>6</sub>)

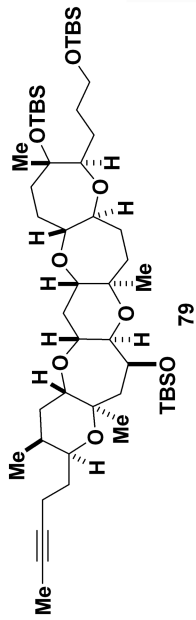

79

S175

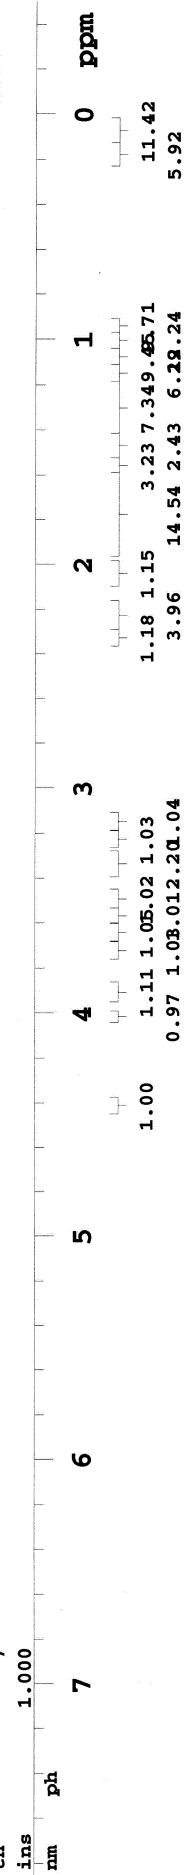

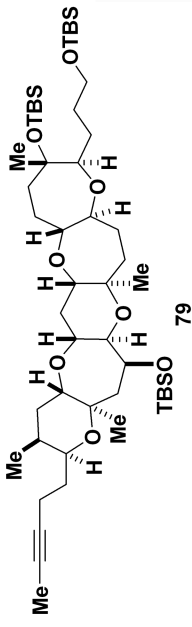

(125 MHz, C<sub>6</sub>D<sub>6</sub>)

STANDARD CARBON PARAMETERS

```

exp3 s2pul
SAMPLE
date Apr 21 2006 dfrq 499.862
solvent Benzene dn H1
file exp dpwr 27
ACQUISITION dof 0
sfrq 125.704 dm YYY
tn C13 dmm w
at 1.298 dmf 12579
np 97994 dseq
sw 37735.8 dres 1.0
fb not used homo n
bs 16 temp 20.0
tpwr 61 PROCESSING
pw 5.3 lb 0.50
dl 0.700 wfile
tof 1883.8 proc ft
nt 5120 fn 131072
ct 656 math f
alock n
gain 56 werr
flags wexp wft
il n wbs wft
in n wnt
dp y
hs mn
DISPLAY
sp -1256.9
wp 26394.7
vs 729
sc 0
wc 250
hzmm 105.58
is 500.00
rfl 21119.6
rfp 16088.3
th 12
ins 100.000
nm
ph
  
```

S176

180 160 140 120 100 80 60 20 ppm

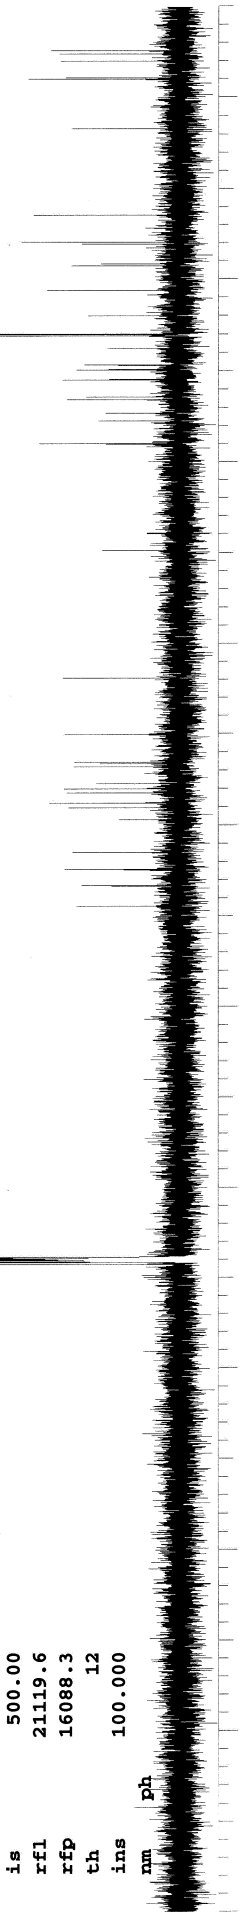

STANDARD PROTON PARAMETERS

exp1 s2pul

SAMPLE DEC. & VT  
 date Apr 25 2006 dfrq 499.862  
 solvent Benzene dn H1  
 file exp dpwr 30  
 ACQUISITION dof 0  
 sfrq 499.862 dm nnn  
 tn H1 dmm c  
 at 1.892 dmf 200  
 np 30272 dseq  
 sw 8000.0 dres 1.0  
 fb not used homo n  
 bs 4 temp 20.0  
 tpwr 54 PROCESSING  
 pw 2.5 wtfile lp  
 dl 1.000 proc  
 tof -140.0 fn not used f  
 nt 64 math  
 ct 64  
 alock n werr  
 gain not used wexp  
 FLAGS n wnt wft  
 il n  
 in y  
 dp nn  
 hs  
 DISPLAY  
 sp -250.0  
 wp 4248.8  
 vs 98  
 sc 0  
 wc 250  
 hzmm 17.00  
 is 14984.97  
 rfl 5205.9  
 rfp 3574.0  
 th 7

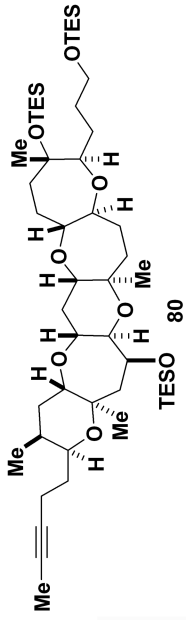

(500 MHz, C<sub>6</sub>D<sub>6</sub>)

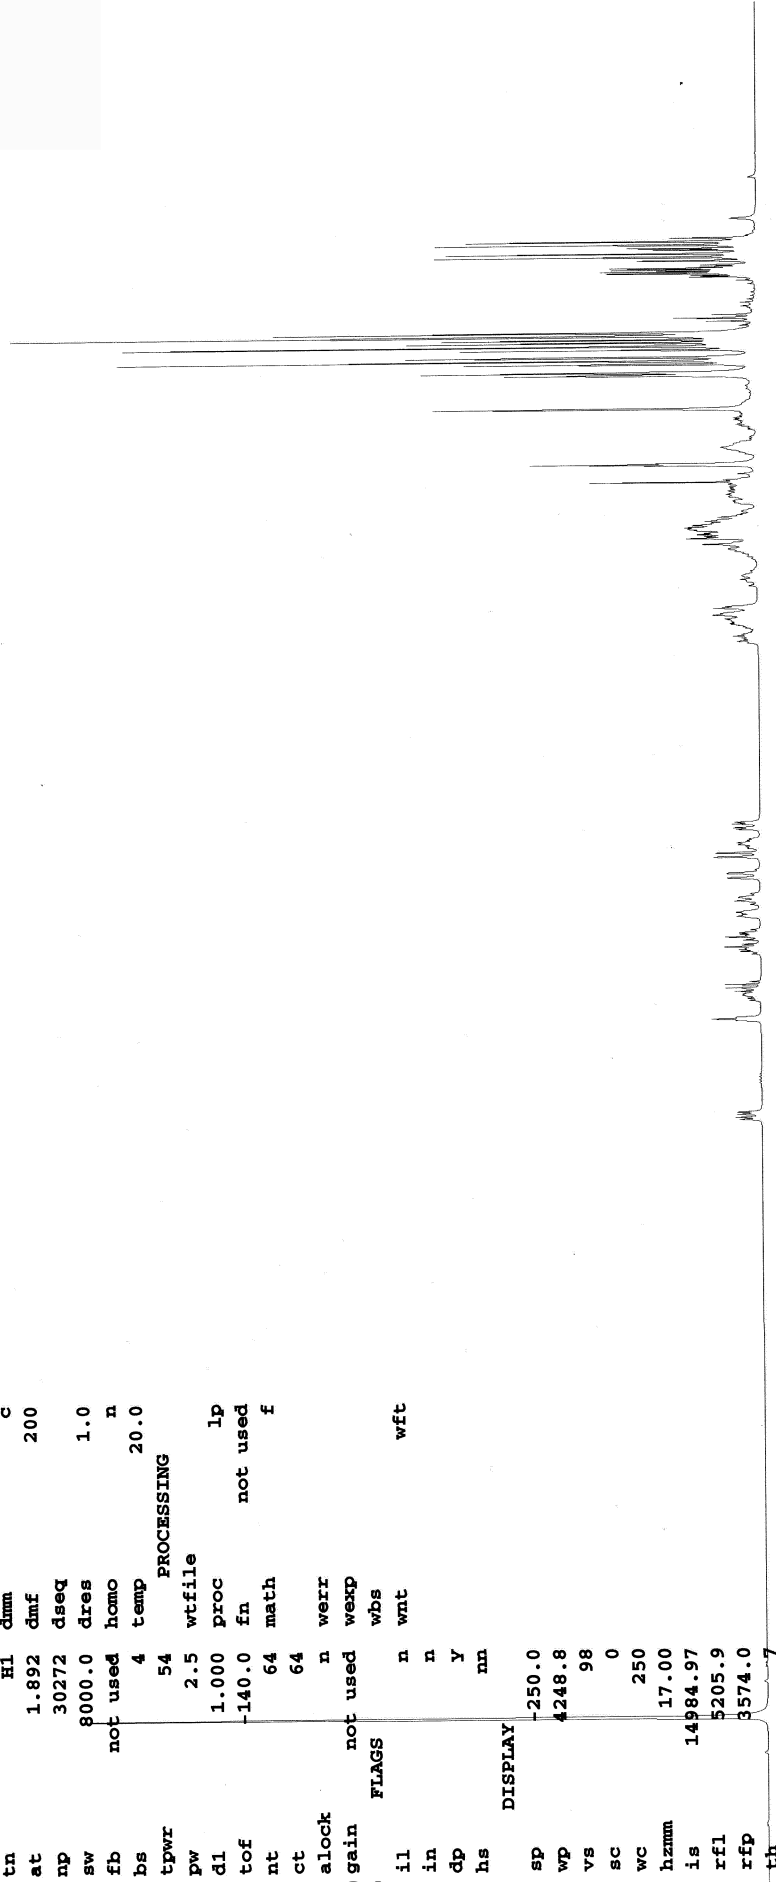

ins 1.000  
 nm ph 7  
 8  
 9  
 10  
 11  
 12  
 13  
 14  
 15  
 16  
 17  
 18  
 19  
 20  
 21  
 22  
 23  
 24  
 25  
 26  
 27  
 28  
 29  
 30  
 31  
 32  
 33  
 34  
 35  
 36  
 37  
 38  
 39  
 40  
 41  
 42  
 43  
 44  
 45  
 46  
 47  
 48  
 49  
 50  
 51  
 52  
 53  
 54  
 55  
 56  
 57  
 58  
 59  
 60  
 61  
 62  
 63  
 64  
 65  
 66  
 67  
 68  
 69  
 70  
 71  
 72  
 73  
 74  
 75  
 76  
 77  
 78  
 79  
 80  
 81  
 82  
 83  
 84  
 85  
 86  
 87  
 88  
 89  
 90  
 91  
 92  
 93  
 94  
 95  
 96  
 97  
 98  
 99  
 100

STANDARD CARBON PARAMETERS

exp3 s2pul

|                  |              |
|------------------|--------------|
| SAMPLE           | DEC. & VT    |
| date Apr 25 2006 | dfrq 499.862 |
| solvent Benzene  | dn H1        |
| file exp         | dpwr 27      |
| ACQUISITION      | dof 0        |
| sfrq 125.704     | dm YYY       |
| tn C13           | dmm w        |
| at 1.298         | dmf 12579    |
| np 97994         | dseq 1.0     |
| sw 37735.8       | dres n       |
| fb not used      | homo n       |
| bs 16            | temp 20.0    |
| tpwr 61          | PROCESSING   |
| pw 5.3           | lb 0.50      |
| d1 0.700         | wfile ft     |
| tof 1883.8       | proc 131072  |
| nt 5120          | fn f         |
| ct 512           | math         |
| alock n          |              |
| gain 56          | werr wft     |
| il               | wexp wft     |
| in n             | wbs          |
| dp n             | wnt          |
| hs y             |              |
| DISPLAY          |              |
| sp -1256.9       |              |
| wp 26394.7       |              |
| vs 373           |              |
| sc 0             |              |
| wc 250           |              |
| hzmm 105.58      |              |
| is 500.00        |              |
| rfl 21119.6      |              |
| rfp 16088.3      |              |
| th 18            |              |
| ins 100.000      |              |
| nm ph            |              |

(125 MHz, C<sub>6</sub>D<sub>6</sub>)

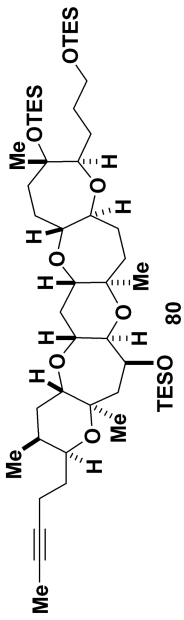

S178

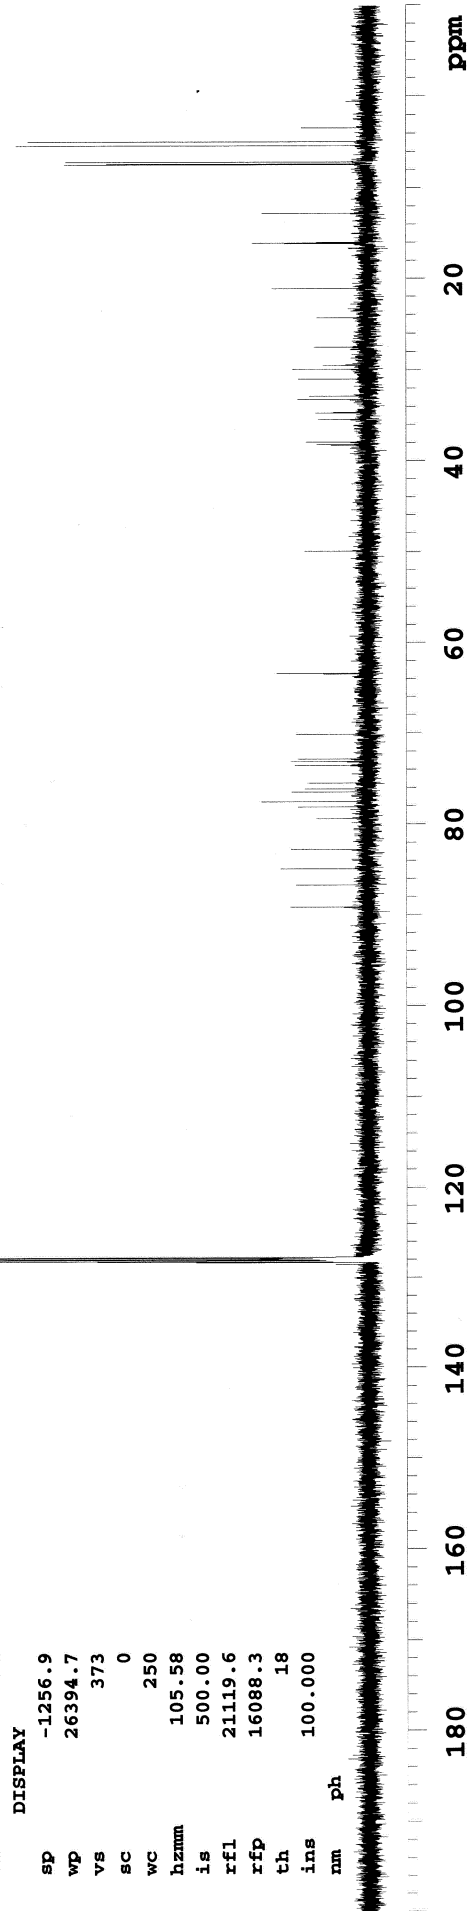

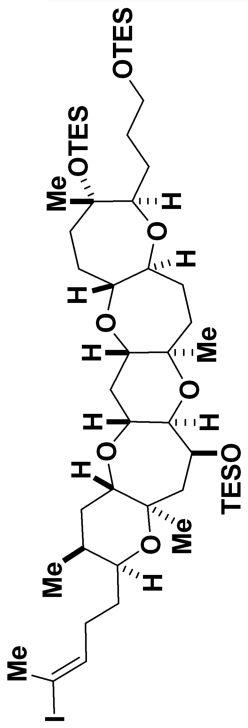

81

(500 MHz, C<sub>6</sub>D<sub>6</sub>)

STANDARD PROTON PARAMETERS

exp3 s2pul

SAMPLE DEC. & VT  
 date Apr 28 2006 dfrq 499.862  
 solvent Benzene dn H1  
 file exp dpwr 30  
 ACQUISITION dof 0  
 sfrq 499.862 dm nnn  
 tn H1 dmm c  
 at 1.892 dmf 200  
 np 30272 dseq  
 sw 8000.0 dres 1.0  
 fb not used homo n  
 bs 4 temp 20.0  
 tpwr 54 PROCESSING  
 pw 2.5 wtfile  
 dl 1.000 proc lp  
 tof -140.0 fn not used  
 nt 64 math f  
 ct 64  
 alock n verr  
 gain not used wexp  
 FLAGS wbs  
 il n wnt wft  
 in n  
 dp y  
 hs nn

DISPLAY

sp -250.3  
 wp 4248.8  
 vs 115  
 SC 0  
 WC 250  
 hzmm 17.00  
 is 7889.77  
 rfl 1640.6  
 rfp 0  
 th 7

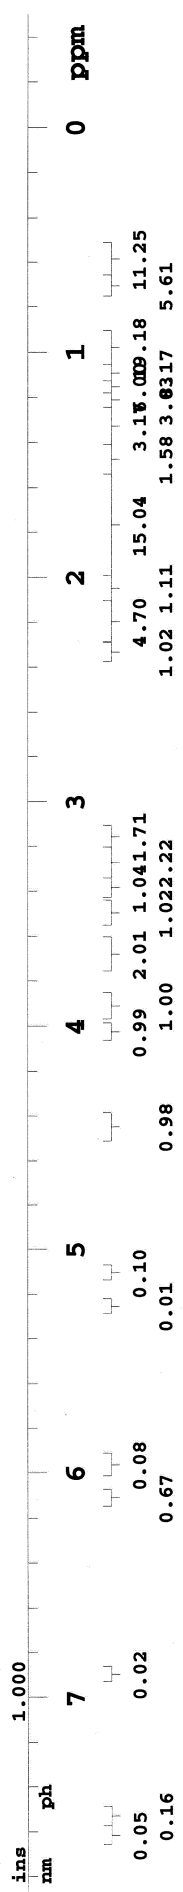

S179



STANDARD CARBON PARAMETERS

exp4 s2pul

|                  |              |
|------------------|--------------|
| SAMPLE           | DEC. & VT    |
| date Apr 28 2006 | dfrq 499.862 |
| solvent Benzene  | dn H1        |
| file exp         | dpwr 27      |
| ACQUISITION      | dof 0        |
| sfrq 125.704     | dm YYY       |
| tn C13           | dmm w        |
| at 1.298         | dmf 12579    |
| np 97994         | dseq         |
| sw 37735.8       | dres 1.0     |
| fb not used      | homo n       |
| bs 16            | temp 20.0    |
| tpwr 61          | PROCESSING   |
| pw 5.3           | lb 0.50      |
| d1 0.700         | wtfile       |
| tof 1883.8       | proc ft      |
| nt 5120          | fn 131072    |
| ct 640           | math f       |
| alock n          |              |
| gain 56          | werr         |
| il n             | wexp wft     |
| in n             | wbs wft      |
| dp y             | wnt          |
| hs nn            |              |
| DISPLAY          |              |
| sp -1256.9       |              |
| wp 26394.7       |              |
| vs 482           |              |
| sc 0             |              |
| wc 250           |              |
| hzmm 105.58      |              |
| is 500.00        |              |
| rf1 21119.6      |              |
| rfp 16088.3      |              |
| th 12            |              |
| ins 100.000      |              |
| nm               | ph           |

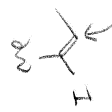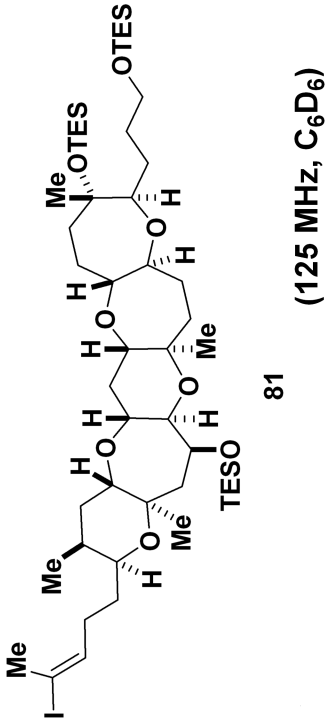

81

(125 MHz, C<sub>6</sub>D<sub>6</sub>)

S180

180 160 140 120 100 80 60 40 20 ppm

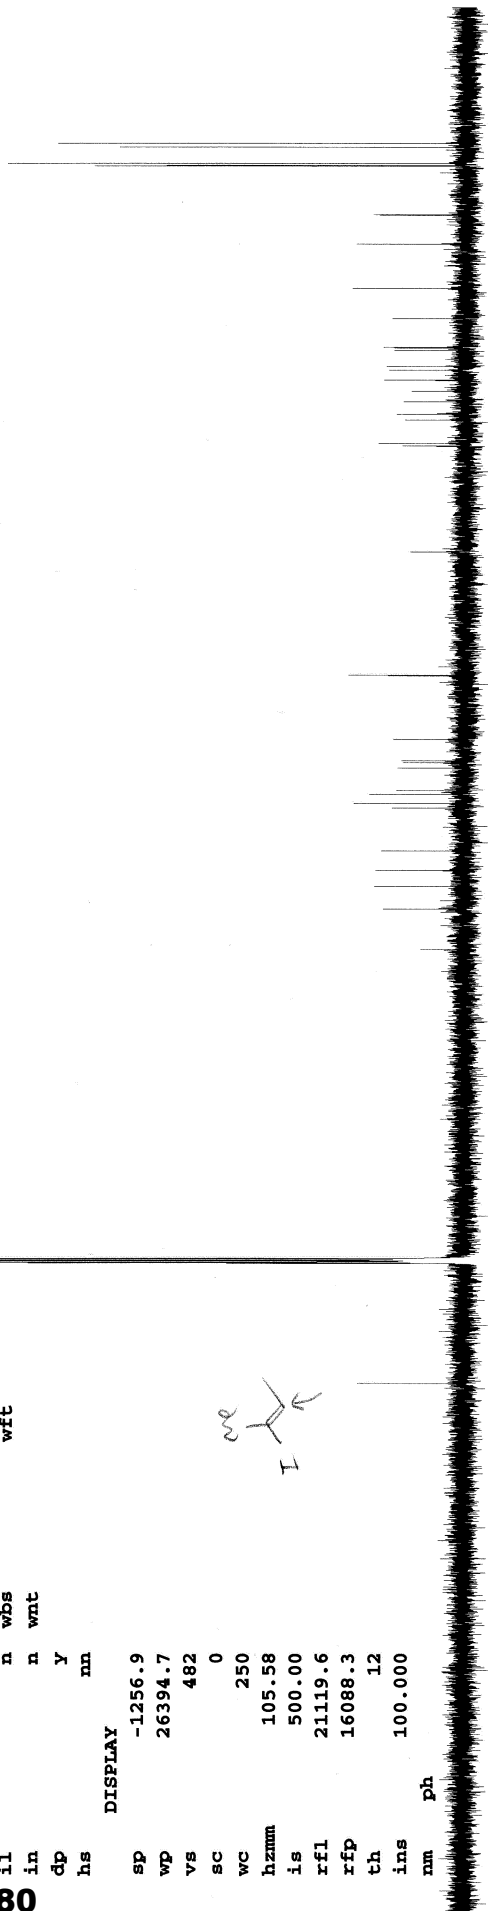

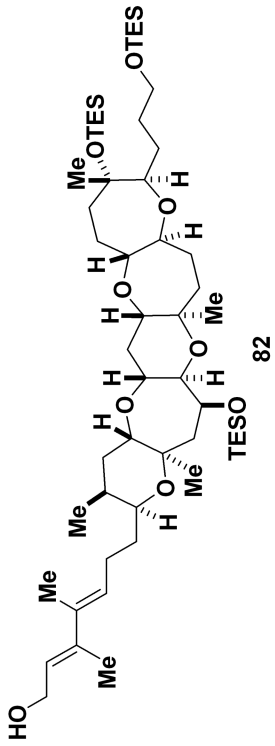

(500 MHz, C<sub>6</sub>D<sub>6</sub>)

STANDARD PROTON PARAMETERS

```

exp3 s2pul
SAMPLE
date May 2 2006 dfrq 499.862 DEC. & VT
solvent Benzene dn H1
file exp 30
ACQUISITION dof 0
sfrq 499.862 dm nnn
tn H1 dmm c
at 1.892 dmf 200
np 30272 dseq
sw 8000.0 dres 1.0
fb not used homo n
bs 4 temp 20.0
tpwr 54 PROCESSING
pw 2.5 wtfile
dl 1.000 proc lp
tof -140.0 fn not used
nt 64 math f
ct 64
alock n werr
gain not used wexp
flags n wnt wft
il n
in n
dp y
hs nn
DISPLAY
sp -250.0
wp 4248.8
vs 518
sc 0
wc 250
hzmm 17.00
is 51231.88
rfl 5205.9
rfp 3574.0
th 7
ins 1.000
nm ph
  
```

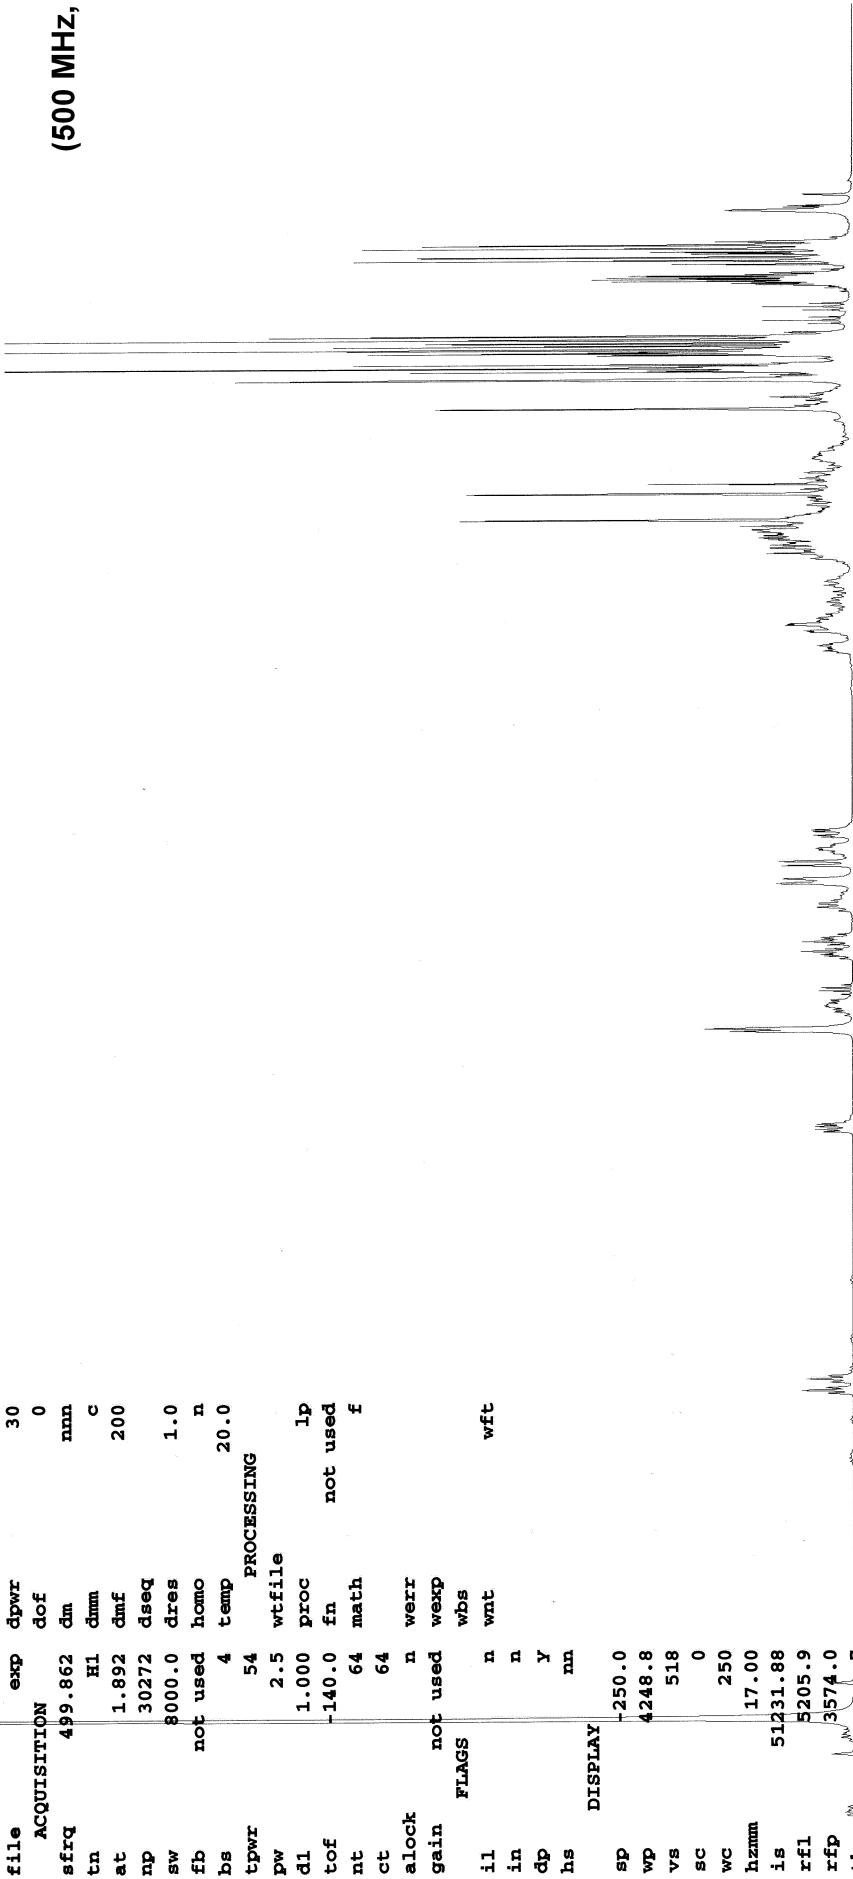

| Chemical Shift (ppm) | Integration         |
|----------------------|---------------------|
| 0.11                 | 0.720.06            |
| 0.09                 | 0.76 0.06           |
| 1.00                 | 1.00                |
| 2.60                 | 0.871.31.1D.05      |
| 1.13                 | 0.89 1.887.16       |
| 1.05                 | 20.75               |
| 5.15                 | 2.40 2.30140.86.95  |
| 3.82                 | 3.82 789.0L.8811.47 |

STANDARD CARBON PARAMETERS

```

exp4 s2pul
SAMPLE DEC. & VT
date May 2 2006 dfrq 499.862
solvent Benzene dn H1
file exp 27
ACQUISITION dof 0
sfrq 125.704 dm YYY
tn C13 dmm w
at 1.298 dmf 12579
np 97994 dseq
sw 37735.8 dres 1.0
fb not used homo n
bs 16 temp 20.0
tpwr 61 PROCESSING
pw 5.3 lb 0.50
dl 0.700 wtfile
tof 1883.8 proc ft
nt 20000 fn 131072
ct 16000 math f
alock n
gain 56 werr
flags wexp wft
il n wbs wft
in n wnt
dp y
hs nn
DISPLAY
sp -1256.9
wp 26394.7
vs 1390
sc 0
wc 250
hzmm 105.58
is 500.00
rfl 21119.6
rfp 16088.3
th 21
ins 100.000
nm ph
  
```

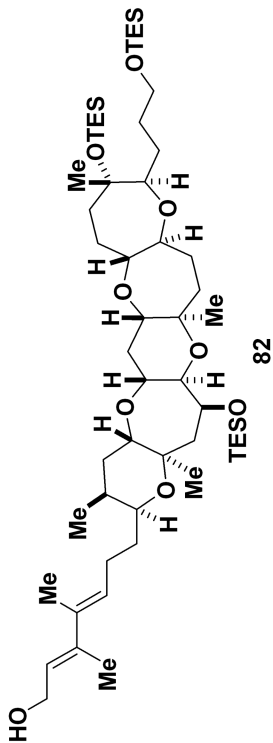

(125 MHz, C<sub>6</sub>D<sub>6</sub>)

S182

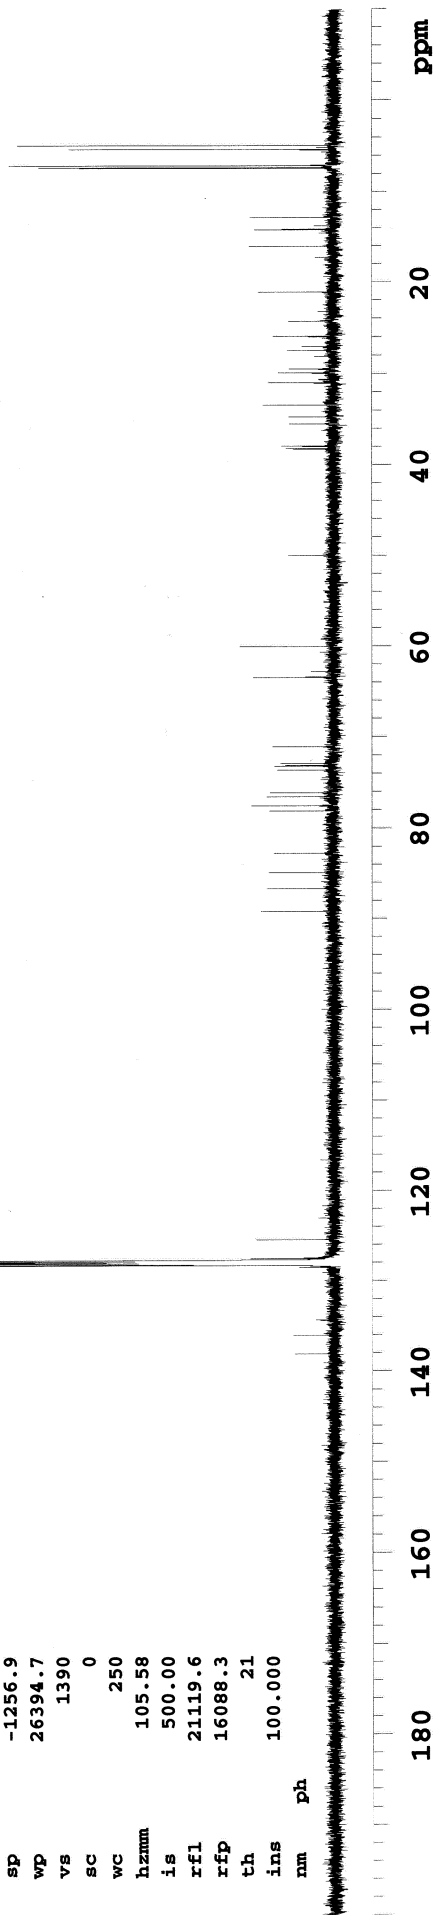

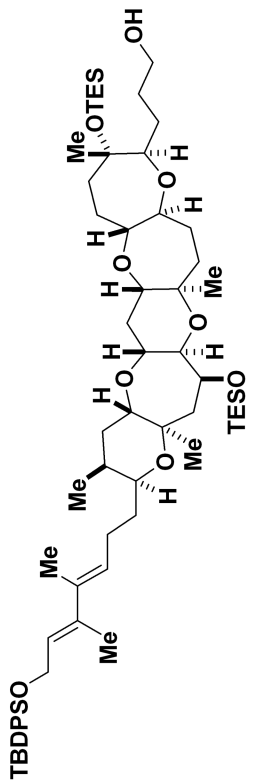

(500 MHz, C<sub>6</sub>D<sub>6</sub>)

83

STANDARD PROTON PARAMETERS

exp3 s2pul

SAMPLE DEC. & VT  
 date May 30 2006 dfrq 499.862  
 solvent Benzene d1 H1  
 file exp dpwr 30  
 ACQUISITION dof 0  
 sfrq 499.862 dm nnn  
 tn H1 dnm c  
 at 1.892 dmf 200  
 np 30272 dseq  
 sw 8000.0 dres 1.0  
 fb not used homo n  
 bs 4 temp 20.0  
 tpwr 54 PROCESSING  
 pw 2.5 wtfile  
 d1 1.000 proc lp  
 tof -140.0 fn not used  
 nt 64 math f  
 ct 64  
 alock n werr  
 gain not used wexp  
 FLAGS wbs wft  
 il n wnt  
 in n  
 dp y  
 hs nn

DISPLAY

sp -250.3  
 wp 4248.8  
 vs 134  
 SC 0  
 WC 250  
 hzmm 17.00  
 fs 24335.86  
 ffl 1640.6  
 xfp 0  
 ch 7

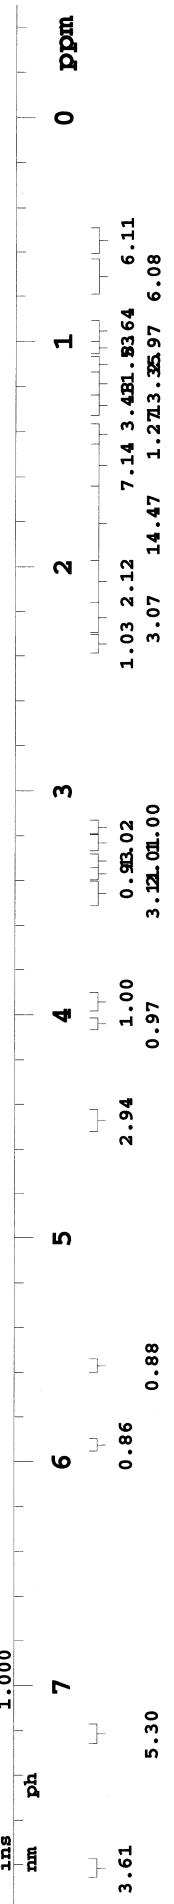

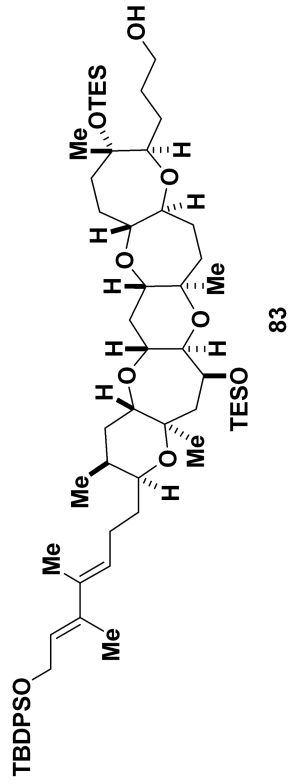

83

(125 MHz, C<sub>6</sub>D<sub>6</sub>)

STANDARD CARBON PARAMETERS

```

exp4 s2pul
SAMPLE
date May 30 2006 dfrq 499.862 DEC. & VT
solvent Benzene dn H1
file exp 27
ACQUISITION dof 0
sfrq 125.704 dm YY
tn C13 dmm w
at 1.298 dmf 12579
np 97994 dseq
sw 37735.8 dres 1.0
fb not used homo n
bs 16 temp 20.0
tpwr 61 PROCESSING
pw 5.3 lb 0.50
d1 0.700 wfile
tof 1883.8 proc ft
nt 5120 fn 131072
ct 512 math f
alock n
gain 56 werr
il il n wexp wft
in in n wbs wft
dp dp y
hs hs nn
DISPLAY
sp -1256.9
wp 26394.7
vs 572
sc 0
wc 250
hzmm 105.58
is 500.00
rfl 21119.6
rfp 16088.3
th 10
ins 100.000
nm ph
  
```

S184

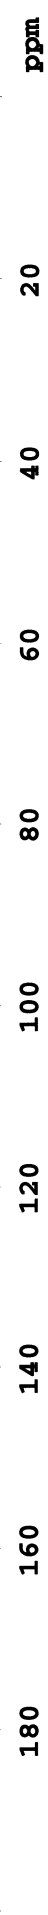



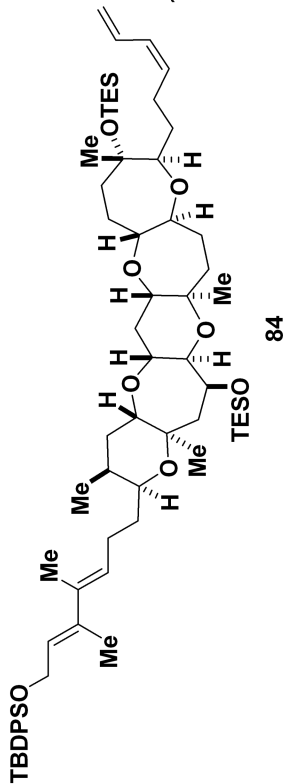

84

(125 MHz, C<sub>6</sub>D<sub>6</sub>)

STANDARD CARBON PARAMETERS

```

exp3 s2pul
SAMPLE DEC. & VT
date Jun 2 2006 dfrq 499.862
solvent Benzene dn H1
file exp dpwr 27
ACQUISITION dof 0
sfrq 125.704 dm YYY
tn C13 dmm w
at 1.298 dmf 12579
np 97994 dseq
sw 37735.8 dres 1.0
fb not used homo n
bs 16 temp 20.0
tpwr 61 PROCESSING
pw 5.3 lb 0.50
dl 0.700 wtfile
tof 1883.8 proc ft
nt 5120 fn 131072
ct 1600 math f
alock n
gain 56 werr
flags il n wexp wft
in in n wbs wft
dp dp y
hs nn
DISPLAY
sp -1256.9
wp 26394.7
vs 1120
sc 0
wc 250
hzmm 105.58
is 250.00
rfl 21119.6
rfp 16088.3
th 14
ins 100.000
nm ph
  
```

S186

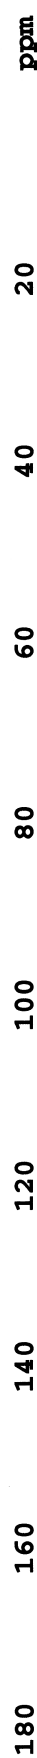

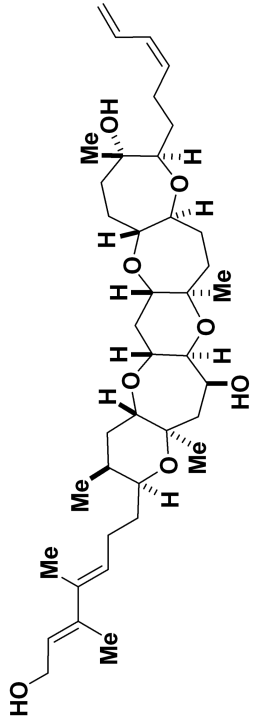

85

(500 MHz, C<sub>6</sub>D<sub>6</sub>)

STANDARD PROTON PARAMETERS

```

exp1 s2pul
SAMPLE
date Jun 3 2006 dfrq 499.862 DEC. & VT
solvent Benzene dn H1
file exp 30
ACQUISITION dof 0
sfrq 499.862 dm nnn
tn H1 dmm c
at 1.892 dmf 200
np 30272 dseq
sw 8000.0 dres 1.0
fb not used hmo n
bs 4 temp 20.0
tpwr 54 PROCESSING
pw 2.5 wfile
d1 1.000 proc lp
tof -140.0 fn not used
nt 64 math f
ct 64
alock n werr
gain not used wexp
FLAGS n wnt wft
il n
in n
dp y
hs nn
DISPLAY
sp -250.0
wp 4248.8
vs 354
sc 0
wc 250
hzmm 17.00
is 75485.88
rfl 5205.9
rfp 3574.0
th 7
ins 1.000
nm ph

```

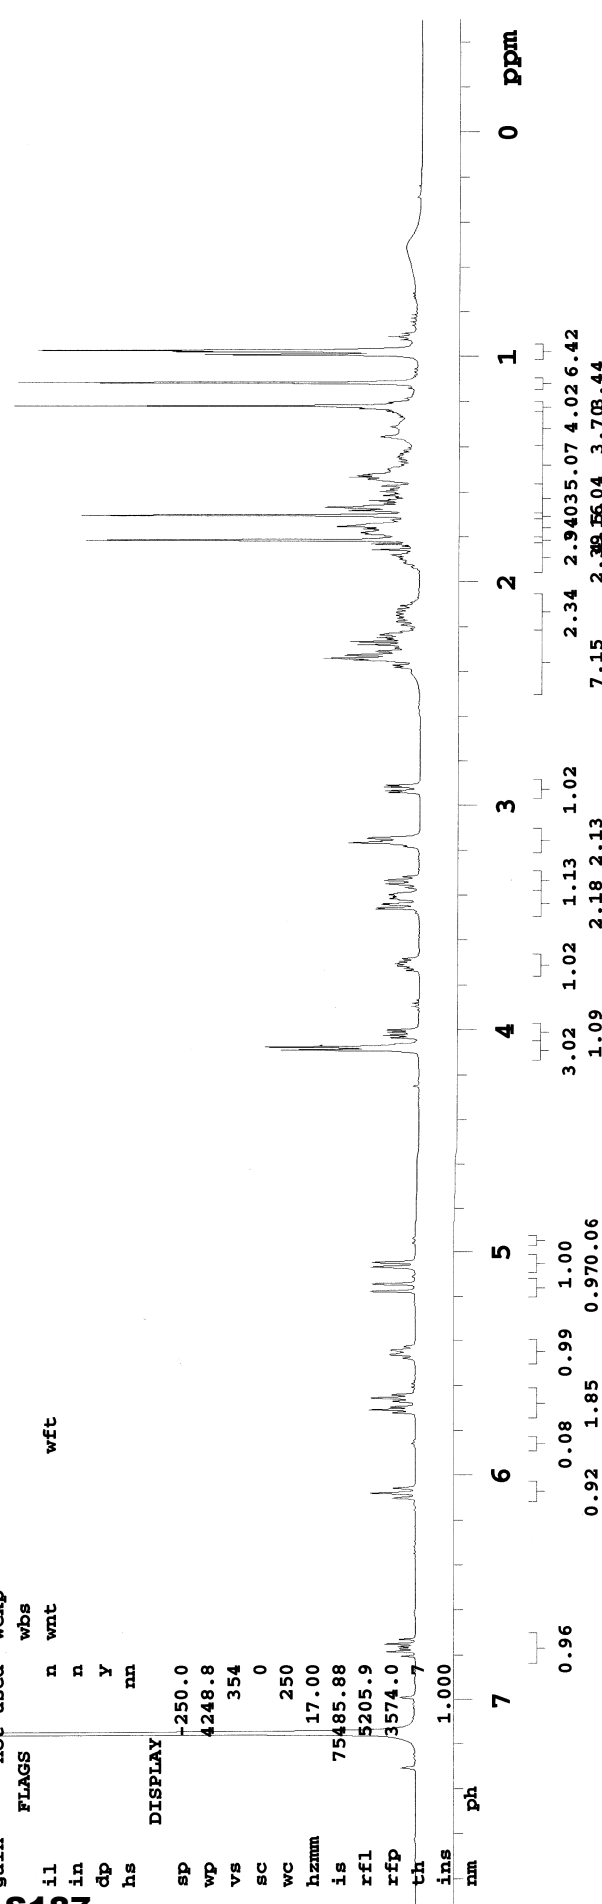



STANDARD CARBON PARAMETERS

```

exp5 s2pul
SAMPLE
date Jun 3 2006 dfreq 499.862
solvent Benzene dn H1
file exp dpwr 27
ACQUISITION dof 0
sfrq 125.704 dm YYY
tn C13 dmm w
at 1.298 dmf 12579
np 97994 dseq
sw 37735.8 dres 1.0
fb not used homo n
bs 32 temp 20.0
tpwr 61 PROCESSING
pw 5.3 lb 0.50
d1 0.700 wtfile
tof 1883.8 proc ft
nt 5120 fn 131072
ct 2432 math f
alock n
gain 56 werr
flags il n wexp wft
in in n wbs wft
dp dp y
hs hs nn
DISPLAY
sp -1256.9
wp 26394.7
vs 1536
sc 0
wc 250
hzmm 105.58
is 500.00
rfl 21120.2
rfp 16088.3
th 13
ins 100.000
nm ph
  
```

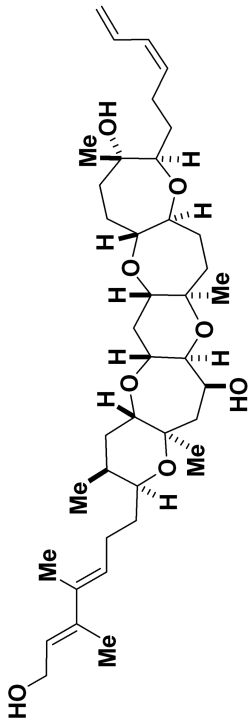

85

(125 MHz, C<sub>6</sub>D<sub>6</sub>)

S188

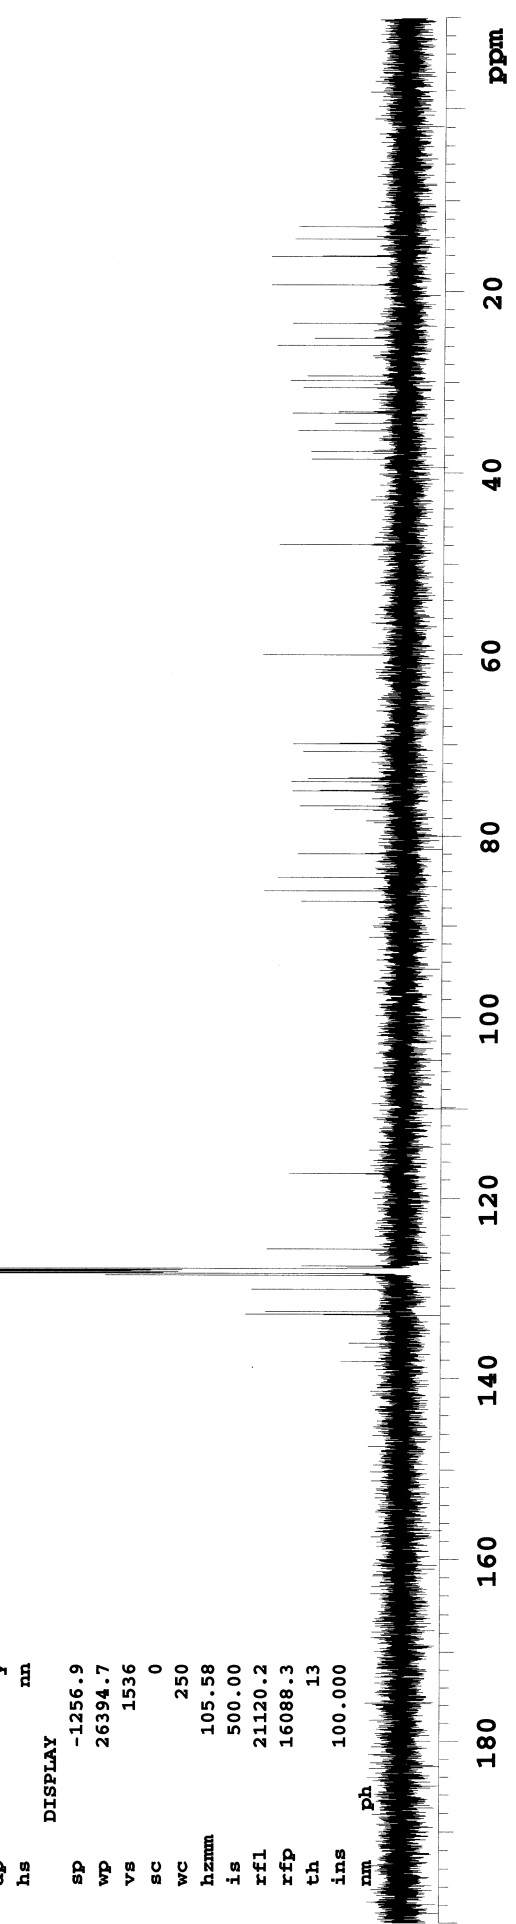

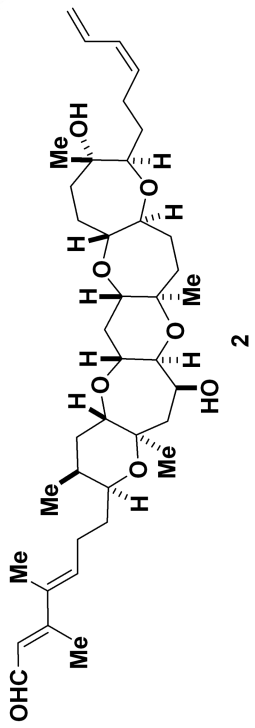

(500 MHz, C<sub>6</sub>D<sub>6</sub>)

STANDARD PROTON PARAMETERS

```

exp3 s2pul
SAMPLE DEC. & VT
date Jun 19 2006 dfrq 499.862
solvent Benzene dn H1
file exp dpwr 30
ACQUISITION dof 0
sfrq 499.862 dm nnn
tn H1 dmm c
at 1.892 dmf 200
np 30272 dseq
sw 8000.0 dres 1.0
fb not used homo n
bs 4 temp 20.0
tpwr 54 PROCESSING
pw 2.5 wtfile
dl 1.000 proc lp
tof -140.0 fn not used f
nt 128 math
ct 128
alock n werr
gain not used wexp
flags n wnt wft
il n
in n
dp y
hs mn
DISPLAY
sp -250.0
wp 5498.4
vs 103
sc 0
wc 250
hzmm 21.99
is 30517.58
rf1 5203.9
rfq 3574.0
th
ins 1.000
nm ph

```

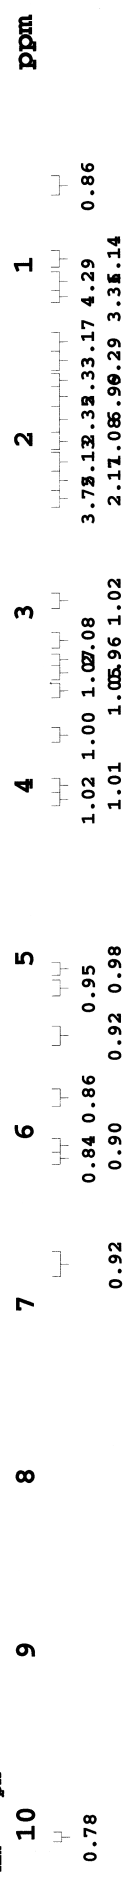

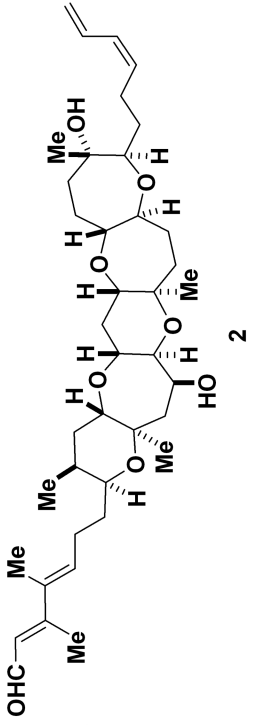

(125 MHz, C<sub>6</sub>D<sub>6</sub>)

STANDARD CARBON PARAMETERS

```

exp3  s2pul
SAMPLE
date   Jun 19 2006      DEC. & VT
solvent Benzene       dfrq   499.862
file   exp             dn      H1
ACQUISITION
sfrq   125.704        dpwr   27
tn     C13            dof    0
at     1.298          dm      YYY
np     97994          dmm    w
sw     37735.8        dmf    12579
fb     not used      dseq   1.0
bs     32             dres   n
tpwr   61            homo   20.0
pw     5.3           temp   20.0
dl     0.700         PROCESsing
tof    1883.8        lb      0.50
nt     20000         wtfile
ct     18816         proc   ft
alock  n             fn     131072
gain   56            math   f
flags  56            werr
il     n             wexp
in     n             wbs   wft
cp     Y             wnt
hs     nn
DISPLAY
sp     -1256.9
wp     26394.7
vs     3617
sc     0
wc     250
hzmm   105.58
is     500.00
rf1    21120.2
rfp    16088.3
th     101
ins    100.000
nm     ph
  
```

127.808  
128.192  
129.000

S190

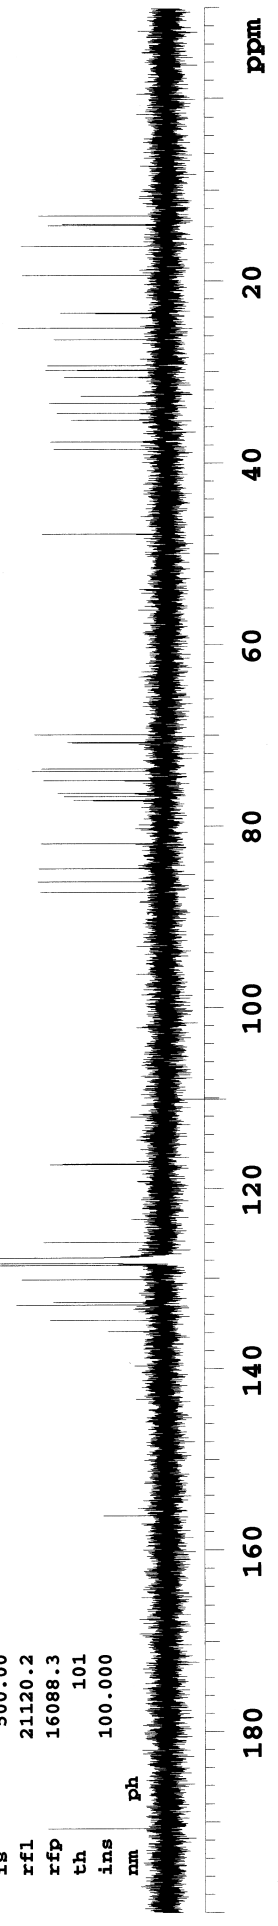

Supplement: NIHMS69330-supplement-3.pdf [file NIHMS69330-supplement-3.pdf]
